1 **Distribution Shapes Govern the Discovery of Predictive Models for Gene Regulation**

2

3 Running Title: **Predicting Transcription Dynamics**

4

5 Brian E. Munsky<sup>1,2\*</sup>, Guoliang Li<sup>3</sup>, Zachary R. Fox<sup>2</sup>, Douglas P. Shepherd<sup>6</sup>, Gregor Neuert<sup>3-5,\*</sup>

6

7 <sup>1</sup>Keck Scholar, Department of Chemical and Biological Engineering, Colorado State University,  
8 Fort Collins, CO 80523, USA

9

10 <sup>2</sup>School of Biomedical Engineering, Colorado State University, Fort Collins, CO 80523, USA

11

12 <sup>3</sup>Department of Molecular Physiology and Biophysics, School of Medicine, Vanderbilt  
13 University, Nashville, TN, 37232, USA

14

15 <sup>4</sup>Department of Biomedical Engineering, School of Engineering, Vanderbilt University,  
16 Nashville, TN, 37232, USA

17

18 <sup>5</sup>Department of Pharmacology, School of Medicine, Vanderbilt University, Nashville, TN,  
19 37232, USA

20

21 <sup>6</sup>Department of Physics, Pediatric Heart Lung Center, and Department of Pediatrics  
22 University of Colorado Denver, Denver, CO 80217

23

24 \*Senior authors to whom correspondence should be addressed

25 E-mail: [munsky@colostate.edu](mailto:munsky@colostate.edu); [gregor.neuert@vanderbilt.edu](mailto:gregor.neuert@vanderbilt.edu)

26

27 Keywords: modeling, prediction, quantitative, single-cell, transcription

28

29 Final Character Count including references (6,435), captions (4,627), title page, materials and  
30 methods (16,319), and spaces): 47,664

31

32 **Significance Statement**

33 Systems biology seeks to combine experiments with computation to predict complex biological  
34 behaviors. However, despite tremendous data and knowledge, most biological models make  
35 terrible predictions. By analyzing single-cell-single-molecule measurements of mRNA in yeast  
36 during stress response, we explore how prediction accuracy is controlled by experimental  
37 distributions shapes. We find that asymmetric data distributions, which arise in measurements of  
38 positive quantities, can cause standard modeling approaches to yield excellent fits but make  
39 meaningless predictions. We demonstrate advanced computational tools that solve this dilemma  
40 and achieve predictive understanding of many spatiotemporal mechanisms of transcription  
41 control including RNA polymerase initiation and elongation and mRNA accumulation, transport  
42 and decay. Our approach extends to any discrete dynamic process with rare events and  
43 realistically limited data.

44

45

46

47  
48  
49  
50  
51  
52  
53  
54  
55  
56  
57  
58  
59  
60  
61  
62  
63  
64  
65  
66

**Abstract:** Despite substantial experimental and computational efforts, mechanistic modeling remains more predictive in engineering than in systems biology. The reason for this discrepancy is not fully understood. Although randomness and complexity of biological systems play roles in this concern, we hypothesize that significant and overlooked challenges arise due to specific features of single-molecule events that control crucial biological responses. Here we show that modern statistical tools to disentangle complexity and stochasticity, which assume normally distributed fluctuations or enormous datasets, don't apply to the discrete, positive, and non-symmetric distributions that characterize spatiotemporal mRNA fluctuations in single-cells. We demonstrate an alternate approach that fully captures discrete, non-normal effects within finite datasets. As an example, we integrate single-molecule measurements and these advanced computational analyses to explore Mitogen Activated Protein Kinase induction of multiple stress response genes. We discover and validate quantitatively precise, reproducible, and predictive understanding of diverse transcription regulation mechanisms, including gene activation, polymerase initiation, elongation, mRNA accumulation, spatial transport, and degradation. Our model-data integration approach extends to any discrete dynamic process with rare events and realistically limited data.

67 The ultimate goal of modeling is to integrate quantitative data to understand, predict, or control  
68 complex processes. Useful models may be discovered through mechanistic or statistical  
69 approaches, but success is always limited by the quantity and quality of data and the rigor of  
70 comparison between models and experiments. These issues are largely solved in engineering,  
71 where computer analyses routinely enable the design of extraordinarily complex systems. Many  
72 would argue that predictive modeling in biology is far behind this capability due to limited  
73 experimental data, inescapable randomness or noise, and overwhelming biological complexity.  
74 These concerns have driven rapid single-cell experimental and computational advances, which  
75 have enabled measurement and modeling of individual biomolecules (i.e., DNA, RNA, and  
76 protein) in single cells with outstanding spatiotemporal resolution<sup>1-12</sup>. Such experiments have  
77 allowed the characterization of many intriguing aspects of biological complexity and variation<sup>13</sup>,  
78 while capturing these phenomena with stochastic gene regulation models has improved  
79 understanding of mechanisms and their parameters<sup>14-18</sup>.

80  
81 Despite experimental and computational advances, most biological models still underperform  
82 expectations. While it is tempting to attribute this failure to “poor models” or “insufficient data,”  
83 an alternative and often overlooked explanation is that combinations of sufficient data and good  
84 models may fail because they haven't been integrated properly. Many standard engineering  
85 techniques exist to integrate models with continuous-valued data, but unlike most engineered  
86 systems, biological fluctuations are dominated by *discrete* events. A single molecule of DNA,  
87 RNA, or protein can change the fate of an organism<sup>19-22</sup>. The resulting positive and discrete  
88 distributions violate the most basic assumption of most model inference approaches (i.e., that  
89 measurement errors are continuous Gaussian random variables). Moreover, this violation is  
90 compounded by the fact that datasets for single-cell imaging and sequencing are usually too  
91 small to invoke the central limit theorem (CLT). Consequently, standard data-model integration  
92 procedures can fail dramatically. We hypothesize that more exact treatment of discrete biological  
93 fluctuations could solve the data-model integration dilemma and enable precise quantitative  
94 predictions.

95  
96 To test this hypothesis, we explore the effects of experimental data distribution shapes on the  
97 uncertainty, bias, and resulting predictive capabilities of single-cell gene regulation models. We  
98 examine the evolutionary conserved Stress Activated Protein Kinase (p38 / Hog1 SAPK) signal  
99 transduction pathway (Figs. 1 and S1), and we quantify its control of transcription mechanisms  
100 including RNA polymerase transcription initiation and elongation on target genes as well as  
101 mature mRNA export and degradation in *Saccharomyces cerevisiae* during adaptation to hyper-  
102 osmotic shock (Fig. 1A)<sup>23</sup>. We quantify the number of individual mRNA primary transcripts at  
103 the site of transcription, in the nucleus, and in the cytoplasm for multiple genes using single-  
104 molecule fluorescence *in situ* hybridization (smFISH) (Fig. 1B,C)<sup>1,2</sup>. We collect high-resolution  
105 data from more than 65,000 cells, and we quantify single-cell spatiotemporal mRNA  
106 distributions that are demonstrably non-normal and non-symmetric (Figs. S2-S3). For such  
107 distributions, huge data sets would be needed to justify application of the CLT as we discuss  
108 below. We use computational analyses to integrate these data with a discrete stochastic  
109 spatiotemporal model<sup>24</sup> (Fig. 1A), and we show how different computational analyses of the  
110 *same experimental data* and *same models* can yield vastly different parameter biases and  
111 uncertainties which cause predictive accuracy to vary by many orders of magnitude (Fig. 1D).

112

113 We discover that standard single-cell modeling approaches, which assume continuous and  
114 normally distributed fluctuations *or* enough data to invoke the CLT<sup>24</sup>, are not always valid to  
115 interpret finite datasets for single-cell transcription responses. We find that these standard  
116 approaches can yield surprising errors and poor predictions (Fig. 1D), especially when mRNA  
117 expression is very low. In contrast, we show that improved computational analyses of full single-  
118 cell RNA distributions can yield far more precisely constrained, less biased, and more  
119 reproducible models (Fig. 1D). We also discover new and valuable information contained in the  
120 intracellular spatial locations of RNA (Figs. 1B, S4-S5), enabling quantitative predictions for  
121 novel dynamics of gene regulation, including transcription initiation and elongation rates,  
122 fractions of actively transcribing cells, and the average number and distribution of polymerases  
123 per active transcription site, which could not otherwise be measured simultaneously in  
124 endogenous cell populations (Figs. 1D, 4).

125

## 126 **Results**

127

128 Under osmotic stress, the high osmolarity glycerol kinase, Hog1, is phosphorylated and  
129 translocated to the nucleus, where it activates several hundred genes<sup>23</sup>. For two of these genes  
130 (*STL1*, a glycerol proton symporter of the plasma membrane and *CTT1*, the Cytosolic catalase  
131 T), we quantified transcription at single-molecule and single-cell resolution (Figs. 1B,C, S2, and  
132 S3), at temporal resolutions of one to five minutes, at two osmotic stress conditions (0.2M and  
133 0.4M NaCl), and in multiple biological replicas. We built histograms to quantify the marginal  
134 and joint distributions of the nuclear and cytoplasmic mRNA (Figs. 2D,E and S2-S5).

135

136 We extended a bursting gene expression model<sup>14,25</sup> to account for transcriptional regulation and  
137 spatial localization of mRNA (Fig. 1A)<sup>24</sup>. We considered four approaches to fit this model to  
138 gene transcription data: First, we used exact analyses of the first moments (i.e., population  
139 means) of mRNA levels as functions of time. Second, we added exact analyses of the second  
140 moments (i.e., variances and covariances). Third, we extended the moments analyses to include  
141 the third and fourth moments. Finally, we used the finite state projection (FSP<sup>26</sup>) approach to  
142 compute the full joint probability distributions for nuclear and cytoplasmic mRNA. *All four*  
143 *approaches provide exact solutions of the same model*, but at different levels of statistical  
144 detail<sup>24</sup>. We used each analysis to compute the likelihood that the measured mRNA data would  
145 match the model, and we maximized this likelihood<sup>24</sup>. As was the case for previous studies<sup>17,27</sup>,  
146 we note that the moments-based likelihood computations assume either normally distributed  
147 deviations (first and second methods) *or* sufficiently large sample sizes such that the moments  
148 can be captured by a normal distribution as guaranteed by the CLT (third method)<sup>24</sup>. In contrast,  
149 the FSP approach (fourth method) makes no assumptions on the distribution shape and has no  
150 requirement for large sample sizes.

151

152 *Different exact analyses of the same model and same data yield dramatically different results.*

153 The four likelihood definitions were maximized by different parameter combinations (Tables S3  
154 and S4), and the fit and prediction results are compared to the measured mean, variance, ON-  
155 fraction (i.e., fraction of cells with more than 3 mRNA / cell), and distributions versus time for  
156 *STL1* and *CTT1* (Figs. 2, S2, and S3). The different analyses used the same model, and they were  
157 fit to the exact same experimental data, but they yielded dramatically different results. When  
158 identified using the average mRNA dynamics (Fig. 2A, left), the model failed to match the

159 variance, ON-fractions, or distributions of the process (Fig. 2B-E, left). Fitting the response  
160 means and variances simultaneously (Fig. 2A-B, center) failed to predict the ON-fractions or  
161 probability distributions (Fig. 2C-E, center). In contrast, parameter estimation using the full  
162 probability distribution (Fig. 2, right column and Figs. S2 and S3) matched all measured  
163 statistics. Importantly, key parameters identified using the FSP approach agree well with  
164 previous studies<sup>18</sup>, such as *STL1* and *CTT1* mRNA transcription and degradation rates. This  
165 agreement indicates strong reproducibility of both experiments and analyses (Tables S3 and S4)  
166 and provides more confident predictions for new transcriptional mechanisms as discussed below.  
167 In contrast, the moment-based analyses overestimated these rates by multiple orders of  
168 magnitude.

169  
170 *Standard modeling identification procedures fail due to bias in moment estimation.* We  
171 considered three explanations for the failure of moment-based parameter estimation approaches:  
172 (i) the model parameters could be unidentifiable from the considered moments; (ii) the  
173 parameters could be too weakly constrained by those moments; or (iii) the moments analyses  
174 could have introduced systematic biases due to a failure of the CLT. To eliminate the first  
175 explanation, we computed the Fisher Information Matrix (FIM) defined by the moments-based  
176 analyses<sup>24</sup>. Because the computed FIM has full rank, we conclude that the model should be  
177 identifiable. If the second explanation were true (i.e., if the moments-analyses had produced  
178 weakly constrained models), then changing the parameters to those selected by the FSP analysis  
179 should have only a small effect on the moment-based likelihood. In such a case, the FSP  
180 parameters would lie within large parameter confidence intervals identified by the moments-  
181 based analyses. However, using the experimental *STL1* data, we computed that the FSP  
182 parameter set was  $10^{2.750}$  less likely to have been discovered using means,  $10^{14.500}$  less likely to  
183 have been discovered using means and variances, and  $10^{664}$  less likely to have been discovered  
184 using the extended moments analysis (Table S5). Thus, we conclude that failure of the moments-  
185 based analyses to match the distributions in Figs. 2, S2, and S3 cannot be explained by  
186 uncertainty alone.

187  
188 To test the third explanation for parameter estimation failure (i.e., systematic bias), we used the  
189 FSP parameters and generated simulated data for the mean (Fig. 3A), standard deviation (Fig.  
190 3B), and the ON-fraction (Fig. 3C) versus time for *STL1* mRNA under an osmotic shock of 0.2M  
191 NaCl. As shown in Fig. 3A,B, the *median* of the simulated data sets (magenta) matches the  
192 experimental data (red and cyan) at all times, but at later times (>20 minutes) both are  
193 consistently less than the theoretical values (black). This mismatch is due to finite sampling from  
194 asymmetric distributions especially at later time points (Fig. 3D). The Gaussian assumption  
195 applied to the first two moments analyses<sup>24</sup>, which does not account for asymmetry, imposes  
196 narrow and nearly symmetric likelihood functions for the sample mean and sample variance  
197 (cyan lines in Fig. 3E,F, respectively). These moment-based likelihood functions are inconsistent  
198 with the actual sample statistic distributions (Fig. 3F, compare cyan and black lines). Because the  
199 mRNA distributions are very broad at late time points (Fig. 3D), one would need to measure  $10^5$   
200 or  $10^7$  cells to estimate the variance within 10% or 1%, respectively (Fig. 3G). Furthermore,  
201 because the mRNA distributions are highly asymmetric, measurements are likely to repeatedly  
202 underestimate the summary statistics. As a result, the moment-based likelihood functions were  
203 deleteriously overfit to underestimated mRNA expression at late time points, and resulted in  
204 excessively confident overestimation of the mRNA degradation rate (Table S3). In principle, the

205 extended moments analysis could better capture the correct likelihood function for the sample  
206 statistics (Figs. 3E,F magenta lines), but this requires *a priori* knowledge of the exact third and  
207 fourth moments. In practice, because those higher order statistics must be estimated using the  
208 model, the resulting extended moments analysis was less biased but more uncertain.

209  
210 *Full distribution analyses substantially reduce model uncertainty and bias.* To confirm the  
211 tradeoff between uncertainty and bias, we applied the Metropolis Hastings algorithm (MHA) to  
212 analyze parameter variation for the different likelihood functions and to estimate parameter  
213 uncertainty and bias (Fig. 4A-C)<sup>24</sup>. Comparing the parameter variations for the transcription  
214 initiation rate,  $k_{i3}$ , and the mRNA degradation rate,  $\gamma$ , illustrates that extending the analysis from  
215 the means to means and variances can affect the parameter identification bias much more than  
216 the parameter uncertainty (Fig. 4A). Moreover, this effect is not always advantageous; inclusion  
217 of variances in the analysis led to substantially increased parameter bias for *STL1* (compare red  
218 and blues ellipses in Fig. 4A,C and see Fig. S9) and relatively little change for *CTT1* (Figs. S10  
219 and S11). In contrast, analyses using the FSP consistently reduced both uncertainty and bias for  
220 both *STL1* and *CTT1* analyses (Figs. 4A-C and S9-S11).

221  
222 *Using spatial fluctuations improves model identification.* Having established that different  
223 stochastic fluctuation analyses attain different levels of uncertainty and bias, we asked if more  
224 information could be extracted from spatially-resolved data. Using a nuclear stain, we quantified  
225 the numbers of *STL1* and *CTT1* mRNA in the nucleus and cytoplasm<sup>24</sup> (Fig. 1B). We then  
226 extended the model and our analyses to consider the joint cytoplasmic and nuclear mRNA  
227 distributions (Fig. S4 and S5). From these analyses, we observed that spatial data reduced  
228 parameter bias for the models, despite the addition of new parameters and model complexity  
229 (Fig. 4A-C and S9-11).

230  
231 *Measuring and predicting transcription site dynamics.* We next explored how well the identified  
232 models could be used to predict the elongation dynamics of nascent mRNA at individual *STL1* or  
233 *CTT1* transcription sites (TS, Fig. 1B,C). We quantified the TS intensity for *CTT1*, and we used  
234 an extended FSP model for *CTT1* regulation to estimate the Polymerase II elongation rate to be  
235  $63 \pm 13$  nt/s<sup>24</sup>, a value consistent with published rates of 14-61 nt/s<sup>28,29</sup>. We assumed an identical  
236 rate for the *STL1* gene, and we used the FSP model for *STL1* gene regulation to predict the *STL1*  
237 TS activity (Figs. 1D, 4D). The spatial (non-spatial) FSP model predicts an average of 7.0 (9.3)  
238 full length *STL1* mRNA per active TS, a value that matches well to our measured value of 4.2-  
239 7.5 *STL1* mRNA per active TS. However, predictions using parameters identified from  
240 moments-based analyses were incorrect by several orders of magnitude (Fig. 1D). In addition to  
241 predicting the average number of nascent mRNA per active TS, the FSP model also accurately  
242 predicts the fraction of cells that have an active *STL1* TS versus time as well as the distribution  
243 of nascent mRNA per TS (Figs. 4E).

## 244 245 **Discussion**

246  
247 Integrating stochastic models and single-molecule and single-cell experiments can provide a  
248 wealth of information about gene regulatory dynamics<sup>14</sup>. In previous work, we discussed the  
249 importance to *choose the right model* to match the single-cell fluctuation information and  
250 achieve predictive understanding<sup>18</sup>. Here we have shown how important it is to *choose the right*

251 *computational analysis* with which to analyze single-cell data. We showed how model  
252 identification based solely upon average behaviors can lead to substantial parameter uncertainty  
253 and bias, potentially resulting in poor predictive power (Figs. 1-4). We showed how single-  
254 molecule experiments often yield discrete, asymmetric distributions that are demonstrably non-  
255 Gaussian (Figs. 2D,E, 3, S2, and S3), and how model extensions to include hard-to-measure  
256 variances and covariances may exacerbate biases (Fig. 4C) leading to greatly diminished  
257 predictive power (Figs. 1D). By taking into account the full distribution shapes, one can correct  
258 these deleterious effects and obtain parameter estimates and predictions that are improved by  
259 many orders of magnitude, even when applied to the same model and same data (Figs. 1D, 2, 4).  
260 We stress that this concern occurs even for models for which exact equations are known and  
261 solvable for the statistical moment dynamics. For more complex and nonlinear models, where  
262 approximate moment analyses are required, these effects are likely to be exacerbated further.  
263 This issue is expected to be even more relevant in mammalian systems, which exhibit greater  
264 bursting<sup>1,2,21</sup> and for which data collection may be limited to smaller sizes (e.g., by increased  
265 image processing difficulties for complex cell shapes or by small numbers of cells, as available  
266 from an organ, a tissue from a biopsy, or for a rare cell type population).

267  
268 Because most single-cell modeling investigations to date have used only means or means and  
269 variances from finite data sets to constrain models, it is not surprising that many biological  
270 models fail to realize predictive capabilities. Conversely, our full consideration of the single-  
271 molecule distributions enabled discovery of a comprehensive model that quantitatively captures  
272 transcription regulation with biologically realistic rates and interpretation for transcription  
273 initiation, transcription elongation, and mRNA export and nuclear and cytoplasmic mRNA  
274 degradation (Fig. 1A). We argue that the solution is not to collect increasingly massive amounts  
275 of data, but instead to develop computational tools that utilize the full, unbiased spatiotemporal  
276 distributions of single-cell fluctuations. By addressing the limitations of current approaches and  
277 relaxing requirements for normal distributions or large sample sizes, our approach should have  
278 general implications to improve mechanistic model identification for any discipline that is  
279 confronted with non-symmetric datasets and finite sample sizes.

## 280 281 **Methods and Materials**

282  
283 **Yeast strain and growth condition.** *Saccharomyces cerevisiae* BY4741 (*MATa*; *his3Δ1*;  
284 *leu2Δ0*; *met15Δ0*; *ura3Δ0*) was used for time-lapse microscopy and FISH experiments. Cells  
285 are grown in complete synthetic media (CSM, Formedia, UK) to an optical density (OD) of 0.5.  
286 Nuclear enrichment of YFP C-terminus tagged Hog1 was measured in single cells over time in  
287 response to osmotic stress<sup>30,31</sup>.

288  
289 **Microscopy setup for time-lapse and single molecule RNA FISH imaging.** Cells were imaged  
290 with a Nikon Ti Eclipse epifluorescent microscope equipped with perfect focus (Nikon), a 100x  
291 VC DIC lens (Nikon), fluorescent filters for YFP, DAPI, TMR and CY5 (Semrock), an X-cite  
292 120 fluorescent light source (Excelitas), and an Orca Flash 4v2 CMOS camera (Hamamatsu).  
293 The microscope was controlled by Micro-Manager program<sup>32</sup>.

294  
295 **Image acquisition for time-lapse and single molecule RNA FISH imaging.** Constant focus  
296 mode live cell time-lapse microscopy was performed by taking bright field images every 10 s

297 and YFP fluorescent images every minute. Single molecule RNA-FISH microscopy was  
298 performed as z-stacks of 200nm between images from fixed yeast cells for bright field, DAPI,  
299 TMR and CY5.

300

301 **Sample preparation for live cell time-lapse microscopy.** Hog1-YFP tagged yeast cells are  
302 loaded into a flow chamber<sup>33</sup>. CSM or CSM with 0.2M or 0.4M NaCl was passed through the  
303 flow chamber using a syringe pump (New Era Pump Systems) at a pump rate of 0.1 ml/minute.

304

305 **Image analysis for time-lapse microscopy.** The bright field and YFP images are background  
306 corrected and smoothed. The YFP images are then thresholded and converted to a binary image  
307 resulting in a nuclear marker for cell segmentation. The processed bright field and the binary  
308 YFP images were combined using morphological reconstruction, and cells were segmented with  
309 a watershed algorithm. After segmentation, the centroid of each cell was computed and tracked  
310 over time to generate single cell time trajectories. For each cell the Hog1 nuclear enrichment  
311 was then calculated as  $Hog1(t) = [(I_t(t) - I_b) / (I_w(t) - I_b)]$ , with  $I_w$  (average per pixel fluorescent  
312 intensity of the whole cell),  $I_b$  (average per pixel fluorescent intensity of the camera background),  
313 and  $I_t$  (average per pixel fluorescent intensity of the 100 brightest fluorescent pixels). The single  
314 cell traces were smoothed and subtracted by the Hog1(t) signal on the beginning of the  
315 experiment. For cell volume measurements, volume change relative to the volume at the  
316 beginning of the experiment was calculated. The median and the average median distance  
317 (standard deviation of the median) from single cell time traces of Hog1- YFP and cell volume  
318 was computed. The final time-lapse microscopy data set consist of 246 (0.2M NaCl) and 167  
319 (0.4M NaCl) cells. Each time course was measured in duplicates or triplicates.

320

321 **Sample preparation for single-molecule RNA-FISH.** Yeast cells (OD = 0.5) was concentrated  
322 tenfold through a filter system, then exposed to NaCl concentration of 0.2 M and 0.4 M NaCl,  
323 and then fixed in 4 % formaldehyde at time points 0, 1, 2, 4, 6, 8, 10, 15, 20, 25, 30, 35, 40, 45,  
324 50, 55 minutes after osmotic stress. After fixation, cells are spheroplasted with 2.5 mg/ml  
325 Zymolyase (US Biological) until cells turn from an opaque to a black color. Cells are stored in  
326 70 % ethanol at +4C for at least 12 hours. Hybridization and RNA-FISH probe preparation  
327 conditions were applied as published<sup>18</sup>. Table S1 contains the RNA-FISH probes for *STL1* and  
328 *CTT1*. Each time course was measured in duplicate or triplicate.

329

330 **Image analysis for single-molecule RNA-FISH.** Each DAPI image stack was maximum  
331 intensity projected, thresholded, converted into a binary image, and individual connected regions  
332 of biologically relevant size was segmented resulting in individually labeled nuclei. For each  
333 cell, the entire DAPI image stack was converted into a binary image stack using cell specific  
334 DAPI thresholds resulting in 3D thresholded nucleus and cytoplasm. The last 5 images of the  
335 bright field image stack were maximum projected to generate the cell outlines. This image was  
336 background corrected and combined with the threshold DAPI image using morphological  
337 reconstruction and cells were segmented with a watershed algorithm. To identify RNA spots, a  
338 fluorescent intensity threshold was determined for each dye, and each field of view imaged. For  
339 a specific time course experiment, the average fluorescent threshold was determined from the  
340 average of all the individual thresholds. After the thresholds had been determined each image in  
341 the stack was Gaussian filtered, filtered with a Laplacian of a Gaussian filter to detect punctuate  
342 in the image, converted into binary images using the previously determined threshold, and the



343 regional maxima was determined within the image stack. A mask of segmented nucleus and  
344 cytoplasm was applied to the filtered RNA-FISH image stacks and the numbers of RNA spots  
345 were counted in each compartment for each cell in three dimensions. To determine the number  
346 of transcripts of each transcription site, we determined the total intensity of each RNA spot in the  
347 cell. We also fitted each RNA spot with a 2D Gaussian function to determine the RNA spot  
348 intensity and found very good agreement between the fitted and the total RNA spot intensities.  
349 The total RNA-FISH data set consists of a total of 65454 single cells (25511 at 0.2M NaCl and  
350 39943 at 0.4M NaCl).

351  
352 **RNA-FISH data analysis.** For each time point, a distribution of mRNA molecules in single cells  
353 was determined as the marginal distribution of total *STL1* and *CTT1* mRNA or as the joint  
354 probability distribution of nuclear and cytoplasmic RNA. The distributions were also  
355 summarized in a binary data set of ON-cells and OFF-cells. Cells with three or more mRNA  
356 molecules were considered ON-cells for quantification of the ON-fraction. The population  
357 average was computed as the mean marginal cytoplasmic or nuclear RNA for each mRNA  
358 species. To quantify transcription site intensities, we recorded the intensity of all spots in the  
359 nuclei for all cells. The brightest nuclear spots of each cell were labeled as potential  
360 transcription sites, and were temporarily removed from the data set. We then computed the  
361 median intensity for the remaining nuclear spots, and we used this median value to define the  
362 equivalent mature nuclear mRNA fluorescence intensity. Next, we re-examined the brightest  
363 RNA spot in each nucleus (i.e., the potential transcription sites), and we computed the  
364 fluorescence intensity in units of mature mRNA intensities. Potential transcription sites that had  
365 intensities greater than the equivalent of two mature mRNA molecules were labeled as active  
366 transcription sites. This approach was applied to all cells from a single experiment. From this  
367 analysis, we computed the fraction of cells with an active transcription site as a function of time,  
368 the single-cell distributions of full length RNA transcripts per transcription site as a function of  
369 time, and the average number of full length RNA transcripts per transcription site as a function  
370 of time.

371  
372 **Hog1-Kinase Model.** To model the temporally-varying Hog1p localization signal, we adopt the  
373 model from<sup>18</sup>, and we fit parameters of this model to the measured Hog1p nuclear enrichment  
374 levels as functions of time, and osmolyte concentrations (see Table S2 and Fig. S1). This time-  
375 varying signal has been used as an input to the gene regulation models.

376  
377 **Gene Regulation Model.** To capture the spatial stochastic expression of *STL1* or *CTT1* mRNA,  
378 the four-state *Hog1p*- activated gene expression model identified in Ref. 18 was extended to  
379 account for spatial localization of mRNA in the nucleus or cytoplasm (see Fig. 1A). In total,  
380 there are 13 non-spatial or 15 spatial parameters in the model.

381  
382 **Computation of Moments.** Moment dynamics were analyzed using sets of coupled linear time-  
383 varying ordinary differential equations. These ODEs provide exact expressions for the  
384 dynamics of the model's means, variances, covariances and higher moments<sup>34</sup>. Because the  
385 reaction rates are all linear, these moment equations are closed, and the moments can be  
386 computed with no assumption on the distribution shape.

387

388 **Computation of Full Distributions.** Distributions were computed using the Finite State  
389 Projection approach<sup>26</sup> to approximate the exact solution of the Chemical Master Equation.

390  
391 **Computation of Moment-Based Likelihood Functions.** To compare computed moments to  
392 measured experimental data required computation of the likelihood that the measured moments  
393 (e.g., means or covariance matrix) would have been observed by chance given that the model  
394 were correct. Three different approaches were derived to compute the likelihood of the observed  
395 moments given the model. First, to estimate the likelihood that the average data could come  
396 from the model, fluctuations were assumed to be Gaussian, with the model-generated means and  
397 the measured sample (co)variances. Second, to compute the likelihood to observe both the  
398 measured sample variance (non-spatial) or covariance matrix (spatial), the chi-squared  
399 distribution (non-spatial) or Wishart distribution (spatial) were used to approximate the  
400 likelihood to obtain the measured sample means and variances, given the model<sup>35</sup>. Third, the  
401 approach from Ref. 17 (based upon application of the central limit theorem) was used to  
402 approximate the joint likelihood to simultaneously measure the joint sample means and sample  
403 covariance matrix in which the co-variance of the first two moments was assumed to depend  
404 upon the first four moments of the model at each condition and point in time.

405  
406 **Computation of the Full Distribution Likelihood.** The likelihood of the full distribution data  
407 was computed using the FSP approach, similar to the approach taken in Refs. 18,36.

408  
409 **Parameter Searches to Maximize Likelihood.** Iterative combinations of simplex based  
410 searches and genetic algorithm based searches were used to maximize likelihood functions. All  
411 parameters were defined to have positive values, and searches were conducted in logarithmic  
412 space. The searches are run multiple times from different starting parameter guesses leading to  
413 many tens of millions of function evaluations ( $>4 \times 10^7$  evaluations of the means and moments  
414 analyses,  $>5 \times 10^6$  evaluations of the non-spatial FSP distributions, and  $>5 \times 10^5$  evaluations for  
415 the more computationally expensive analyses of extended moments and the spatial FSP  
416 distributions). Parallel fits were conducted on clusters of more than 128 processors at a time  
417 allowing for the consideration of several millions of model/parameter/experiment combinations  
418 per day.

419  
420 **Quantification of Parameter Uncertainties.** The Metropolis Hastings algorithm<sup>37</sup> was used to  
421 quantify the parameter uncertainties. All MCMC parameter explorations were conducted in  
422 logarithmic parameter space, and all analyses (i.e., means, means and variances, or distributions,  
423 both spatial and non-spatial) used the same proposal distribution for the MCMC chains. This  
424 proposal distribution was a symmetric normal distribution (in logarithmic space) with a variance  
425 of 0.005 (also in logarithmic space). For each parameter proposal, a random selection of  
426 parameters was selected to change, where each parameter had a 50% chance to be perturbed. The  
427 first half of each chain was discarded as an MCMC burn-in period, and all chains were thinned  
428 by 90%. MCMC chains for the means and simpler moments analyses were run for MH chains  
429 with lengths of 1,000,000 parameter evaluations. MCMC analyses for the more computationally  
430 expensive extended moment analyses were run for at least 120,000 parameter evaluations.  
431 MCMC analyses for the non-spatial distribution analyses were run for at least 250,000 parameter  
432 evaluations. MCMC analyses for the most computationally expensive spatial distribution  
433 analyses were run for at least 15,000 parameter evaluations. To evaluate convergence of the

434 MCMC analyses, multiple MCMC chains were run for each analysis. To illustrate the achieved  
435 convergence, Fig. S8 shows the similarity of distributions of likelihood values for two  
436 independent MCMC runs for each analysis and for *STL1* and *CTT1*. The total bias and total  
437 uncertainty, shown in Figs. 4B, 4C, S11B and S11C, were computed as described in the  
438 supplemental material.

439  
440 **Predictions of Transcription Site Activity.** Two different analyses were developed to predict  
441 transcription site (TS) activity: a simplified theoretical analysis of average active TS activity and  
442 an extended FSP analysis of distributions of polymerases on a given TS. In the *simplified*  
443 *analysis*, it was assumed that an *active* TS would correspond to one gene at steady state with the  
444 maximum transcription rate,  $k_{i-max}$ . Under this assumption, the average number of elongating  
445 polymerases is given by  $\langle n_{pol} \rangle = k_{i-max} \tau_{elong} = k_{i-max} L / k_{elong}$ . The average nascent mRNA was  
446 assumed to be half the length of a mature mRNA, and since smFISH probes were equally  
447 distributed along the length of the gene, the average nascent mRNA was assumed to exhibit half  
448 the brightness of a mature mRNA. An *extended FSP approach* similar to that in (38) was also  
449 used to compute the distribution for the number of polymerases at the TS. Under the assumption  
450 that each partially transcribed mRNA was at a random location in the gene, its effective intensity  
451 was approximated to be uniformly distributed between zero and the equivalent of one mature  
452 mRNA. The distribution of TS spot intensities with  $N_{poly}$  polymerases was found through the  
453 convolution of  $N_{poly}$  independent random variables, each with a uniform distribution between  
454 zero and one. The FSP analysis was confirmed using an adapted form of the Stochastic  
455 Simulation Algorithm<sup>39</sup> but with a modification<sup>40</sup> to allow for time varying reaction rates (Fig.  
456 S12). For both experimental and computational analyses, TS sites were labeled as ON if their  
457 predicted or measured intensities were greater than twice the intensity of a single mature mRNA.

458  
459 **Identification of mRNA Elongation Rate.** The transcription elongation rate was found by  
460 computing the TS intensity distribution for *CTT1* at each point in time for 0.2M and 0.4M NaCl  
461 osmotic shock using the previously identified parameters (Table S4) and one free constant to  
462 describe the average elongation rate,  $k_{elong}$ . The probability that the observed distributions of  
463 *CTT1* TS intensities could have originated from this model was computed for all time points and  
464 conditions, and as a function of  $k_{elong}$ . This likelihood was maximized for the different biological  
465 replicas and NaCl concentrations to determine the uncertainty in this parameter. The simplified  
466 theoretical model, which does not account for transitions between active and inactive periods,  
467 provided an *upper bound* on the *CTT1* elongation rates to be  $91 \pm 9$  Nt/s. The more detailed spatial  
468 FSP approach determined the *CTT1* elongation rates to be  $63 \pm 14$  Nt/s. For both cases, the  
469 uncertainty is given as the standard error of the mean using the five experimental replicas (two  
470 for 0.2M NaCl and three for 0.4M NaCl). The elongation rate was then fixed to be 63 Nt/s, and  
471 this rate was used in conjunction with the previously identified parameters to predict the TS  
472 intensity distributions for *CTT1* and *STL1* as functions of time in both osmotic shock conditions  
473 (Figs. 1D, 4D,E and S11D-H).

474  
475 **Codes.** All computational results presented in this paper can be reproduced using the provided  
476 Matlab codes. The codes also include a simple GUI interface to generate additional figures: to  
477 make predictions with changes to the identified parameters, to produce confidence ellipses for  
478 new combinations of parameters, etc.

479

480

## 481 **Acknowledgments**

482 BM and ZF were funded by the W.M. Keck Foundation, DTRA FRCALL 12-3-2-0002 and CSU  
483 Startup Funds. GL and GN were funded by NIH DP2 GM11484901, NIH R01GM115892 and  
484 Vanderbilt Startup Funds. The authors like to thank Luis Aguilera, Anthony Weil, Alexander  
485 Thiemicke, Dustin Rogers, Benjamin Kesler and Rohit Venkat for comments on the manuscript.

486

## 487 **Contributions**

488 BM and ZF designed and implemented the computational analyses. GL and GN designed and  
489 implemented the experimental analyses. BM, ZF, DS and GN wrote the manuscript.

490

## 491 **Conflict of Interest**

492 All authors have reviewed this manuscript, and there are no conflicts of interest.

493

## 494 **References**

- 495 1. Femino, A. M., Fay, F. S., Fogarty, K. & Singer, R. H. Visualization of Single RNA  
496 Transcripts in Situ. *Science* 280, 585–590 (1998).
- 497 2. Raj, A., van den Bogaard, P., Rifkin, S. A., van Oudenaarden, A. & Tyagi, S. Imaging  
498 individual mRNA molecules using multiple singly labeled probes. *Nature Methods* 5, 877–  
499 879 (2008).
- 500 3. Bendall, S. C. *et al.* Single-Cell Mass Cytometry of Differential Immune and Drug  
501 Responses Across a Human Hematopoietic Continuum. *Science* 332, 687–696 (2011).
- 502 4. Hammar, P. *et al.* Direct measurement of transcription factor dissociation excludes a simple  
503 operator occupancy model for gene regulation. *Nature genetics* 46, 405–408 (2014).
- 504 5. Gaublot, J. T. *et al.* Single-Cell Genomics Unveils Critical Regulators of Th17 Cell  
505 Pathogenicity. *Cell* 163, 1400–1412 (2015).
- 506 6. Battich, N., Stoeger, T. & Pelkmans, L. Control of Transcript Variability in Single  
507 Mammalian Cells. *Cell* 163, 1596–1610 (2015).
- 508 7. Buenrostro, J. D. *et al.* Single-cell chromatin accessibility reveals principles of regulatory  
509 variation. *Nature* 523, 486–90 (2015).
- 510 8. Sepulveda, L. A., Xu, H., Zhang, J., Wang, M. & Golding, I. Measurement of gene  
511 regulation in individual cells reveals rapid switching between promoter states. *Science* 351,  
512 1218–1222 (2016).
- 513 9. Morisaki, T. *et al.* Real-time quantification of single RNA translation dynamics in living  
514 cells. *Science* 352, 1425–1429 (2016).
- 515 10. Moffitt, J. R. *et al.* High-throughput single-cell gene-expression profiling with multiplexed  
516 error-robust fluorescence in situ hybridization. *Proceedings of the National Academy of  
517 Sciences* 113, 11046–11051 (2016).
- 518 11. Bintu, L. *et al.* Dynamics of epigenetic regulation at the single-cell level. *Science* 351, 720–  
519 724 (2016).
- 520 12. Frieda, K. L. *et al.* Synthetic recording and in situ readout of lineage information in single  
521 cells. *Nature* 541, 107–111 (2017).
- 522 13. Kumar, R. M. *et al.* Deconstructing transcriptional heterogeneity in pluripotent stem cells.  
523 *Nature* 516, 56–61 (2014).
- 524 14. Munsky, B., Neuert, G. & van Oudenaarden, A. Using Gene Expression Noise to Under-

- 525 stand Gene Regulation. *Science* 336, 183–187 (2012).
- 526 15. Zechner, C., Unger, M., Pelet, S., Peter, M. & Koepl, H. Scalable inference of  
527 heterogeneous reaction kinetics from pooled single-cell recordings. *Nature Methods* 11,  
528 197–202 (2014).
- 529 16. Hilfinger, A., Norman, T. M. & Paulsson, J. Exploiting natural fluctuations to identify  
530 kinetic mechanisms in sparsely characterized systems. *Cell systems* 2, 251–259 (2016).
- 531 17. Ruess, J., Miliás-Argeitis, A. & Lygeros, J. Designing experiments to understand the  
532 variability in biochemical reaction networks. *Journal of The Royal Society Interface* 10,  
533 20130588–20130588 (2013).
- 534 18. Neuert, G. *et al.* Systematic Identification of Signal-Activated Stochastic Gene Regulation.  
535 *Science* 339, 584–587 (2013).
- 536 19. Weinberger, L. S., Burnett, J. C., Toettcher, J. E., Arkin, A. P. & Schaffer, D. V. Stochastic  
537 Gene Expression in a Lentiviral Positive-Feedback Loop: HIV-1 Tat Fluctuations Drive  
538 Phenotypic Diversity. *Cell* 122, 169–182 (2005).
- 539 20. Suel, G. M. *et al.* Tunability and Noise Dependence in Differentiation Dynamics. *Science*  
540 315, 1716–1719 (2007).
- 541 21. Raj, A., Rifkin, S. A., Andersen, E. & van Oudenaarden, A. Variability in gene expression  
542 underlies incomplete penetrance. *Nature* 463, 913–918 (2010).
- 543 22. Balazsi, G., van Oudenaarden, A. & Collins, J. J. Cellular decision making and biological  
544 noise: from microbes to mammals. *Cell* 144, 910–925 (2011).
- 545 23. Saito, H. & Posas, F. Response to Hyperosmotic Stress. *Genetics* 192, 289–318 (2012).
- 546 24. See Materials and Methods and supplemental information.
- 547 25. Peccoud, J. & Ycart, B. Markovian Modeling of Gene-Product Synthesis. *Theoretical*  
548 *Population Biology* 48, 222–234 (1995).
- 549 26. Munsky, B. & Khammash, M. The Finite State Projection Algorithm for the Solution of the  
550 Chemical Master Equation. *The Journal of Chemical Physics* 124, 044104 (2006).
- 551 27. Komorowski, M., Costa, M. J., Rand, D. A. & Stumpf, M. P. H. Sensitivity, robustness, and  
552 identifiability in stochastic chemical kinetics models. *Proceedings of the National Academy*  
553 *of Sciences* 108, 8645–8650 (2011).
- 554 28. Larson, D. R., Zenklusen, D., Wu, B., Chao, J. A. & Singer, R. H. Real-Time Observation  
555 of Transcription Initiation and Elongation on an Endogenous Yeast Gene. *Science* 332, 475–  
556 478 (2011).
- 557 29. Mason, P. B. & Struhl, K. Distinction and relationship between elongation rate and  
558 processivity of RNA polymerase II in vivo. *Molecular Cell* 17, 831–840 (2005).
- 559 30. Muzzey, D., Gomez-Uribe, C. A., Mettetal, J. T. & van Oudenaarden, A. A Systems-Level  
560 Analysis of Perfect Adaptation in Yeast Osmoregulation. *Cell*, 138(1), 160–171 (2009).
- 561 31. Ferrigno, P., Posas, F., Koepp, D., Saito, H. & Silver, P.A. Regulated nucleo/cytoplasmic  
562 exchange of HOG1 MAPK requires the importin  $\beta$  homologs NMD5 and XPO1. *Embo J.*,  
563 17(19), 5606–5614 (1998).
- 564 32. Edelstein, A. D., Tsuchida, M. A., Amodaj, N., Pinkard, H., Vale, R. D. & Stuurman, N.  
565 Advanced methods of microscope control using  $\mu$ Manager software. *Journal of Biological*  
566 *Methods*, 1(2), e10 (2014).
- 567 33. Mettetal, J. T., Muzzey, D., Gomez-Uribe, C. & van Oudenaarden, A. The Frequency  
568 Dependence of Osmo-Adaptation in *Saccharomyces cerevisiae*. *Science*, 319(5862), 482–  
569 484 (2008).

- 570 34. Hespanha, J. P. & Singh, A. Stochastic models for chemically reacting systems using  
571 polynomial stochastic hybrid systems. *International Journal of robust and nonlinear*  
572 *control*, 15(15), 669–690 (2005).
- 573 35. Wishart, J. The Generalised Product Moment Distribution in Samples from a Normal  
574 Multivariate Population. *Biometrika*, 20A(1/2), 32-52 (1928).
- 575 36. Fox, Z., Neuert, G. & Munsky, B. Finite state projection based bounds to compare chemical  
576 master equation models using single-cell data. *J. Chemical Physics*, 145(7), 074101 (2016).
- 577 37. Chib, S. & Greenberg, E. Understanding the Metropolis-Hastings Algorithm. *The American*  
578 *Statistician*, 49(4), 327–335 (1995).
- 579 38. Senecal, A., Munsky, B., Proux, F., Ly, N., Braye, F. E., Zimmer, C., Mueller, F. &  
580 Darzacq, X. Transcription factors modulate c-Fos transcriptional bursts. *Cell Reports*, 8(1),  
581 75–83 (2014).
- 582 39. Gillespie, D. T. Exact stochastic simulation of coupled chemical reactions. *J. Phys. Chem.*,  
583 81, 2340–2361 (1977).
- 584 40. Voliotis, M., Thomas, P., Grima, R. & Bowsher, C. G. Stochastic Simulation of  
585 Biomolecular Networks in Dynamic Environments. *PLoS Computational Biology*, 12(6),  
586 e1004923 (2016).

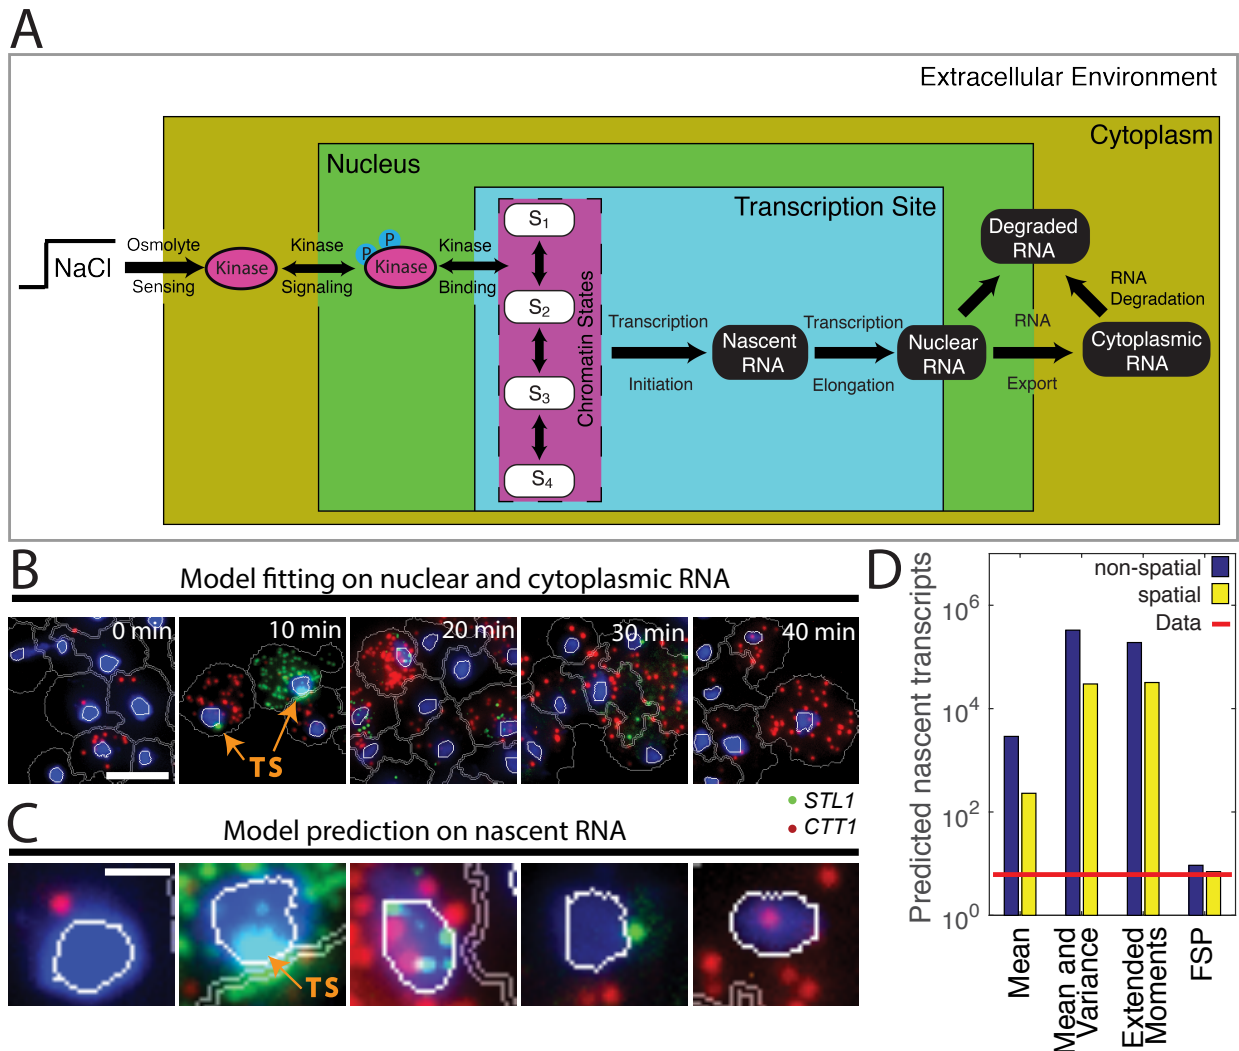

587  
 588 **Figure 1. Discovering stochastic models to predict single-cell gene regulation.** (A) Scope of  
 589 the model to be identified, including quantitative analysis of MAPK induction and translocation,  
 590 chromatin reorganization, polymerase initiation and elongation, and mRNA transcription, export,  
 591 nuclear and cytoplasmic degradation. (B) Collection of single-cell spatiotemporal RNA  
 592 transcription data to constrain the model (Fitting). Cytoplasmic and nuclear transcription  
 593 quantification for expression of two mRNA species (*CTT1* in red and *STL1* in green). DAPI  
 594 stained nucleus in blue. White line is the nuclear border, and the grey line is the cell boundary  
 595 after automated segmentation. Representative images of cells exposed to 0.2M NaCl. 65454 cells  
 596 in total have been imaged at 16 time points. Scale bar: 5 $\mu$ m. (C) Single-gene transcription site  
 597 (TS) data used to validate the model (Prediction). Intensely bright spots within some cell nuclei  
 598 are identified as transcription sites (TS). Scale bar: 1 $\mu$ m. (D) Validation of the model by  
 599 comparing measured (solid red line) to predicted average number of nascent transcripts at active  
 600 transcription sites using the same model and same data but under different modeling  
 601 assumptions. Non-spatial analyses (blue) use the statistics (means, means and variances, or  
 602 distributions) of the total number of RNA per cell. Spatial analyses (yellow) use the joint  
 603 statistics of nuclear and cytoplasmic number of RNA per cell.

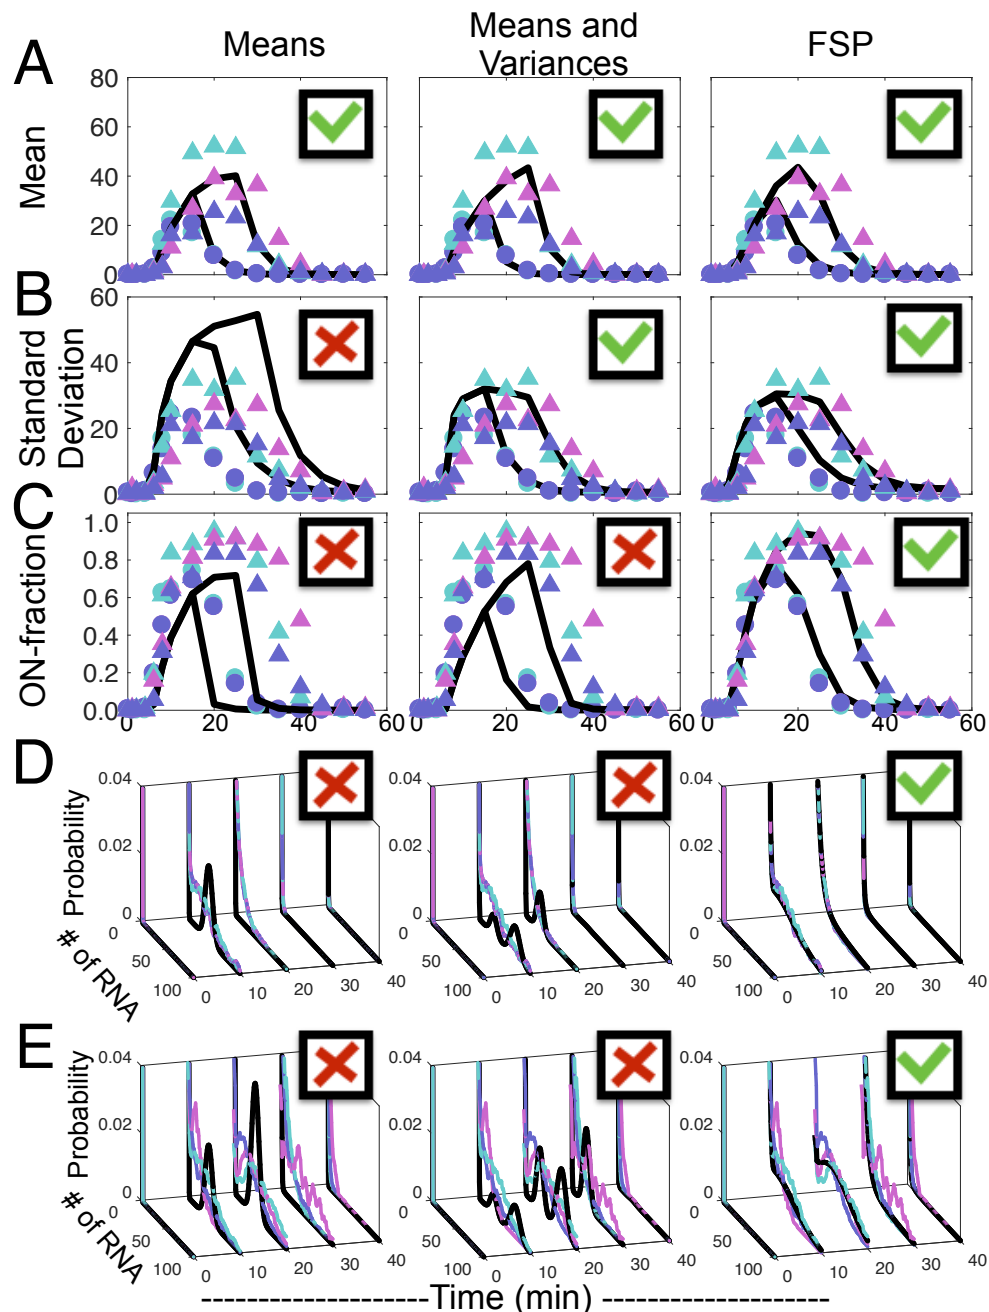

604  
 605 **Figure 2. Different computational analyses result in matches to different data statistics.** (A)  
 606 Mean number, (B) standard deviation, (C) ON-fraction (cells with >3 mRNA), and (D,E)  
 607 distributions of *STL1* mRNA copy number. In panels A-C, data for 0.2M NaCl (circles, two  
 608 biological replica) and 0.4M NaCl (triangles, three biological replica) are shown in magenta,  
 609 cyan, and violet, and model results are shown in black. Temporal distributions are measured at  
 610 (D) 0.2M NaCl and (E) 0.4M NaCl (cyan, violet, and magenta are biological replica). The left  
 611 column corresponds to the best fit to the measured mean; the center column corresponds to the  
 612 best fit to the measured means and variances; and the right column corresponds to the best fit to  
 613 the full measured distributions.  
 614



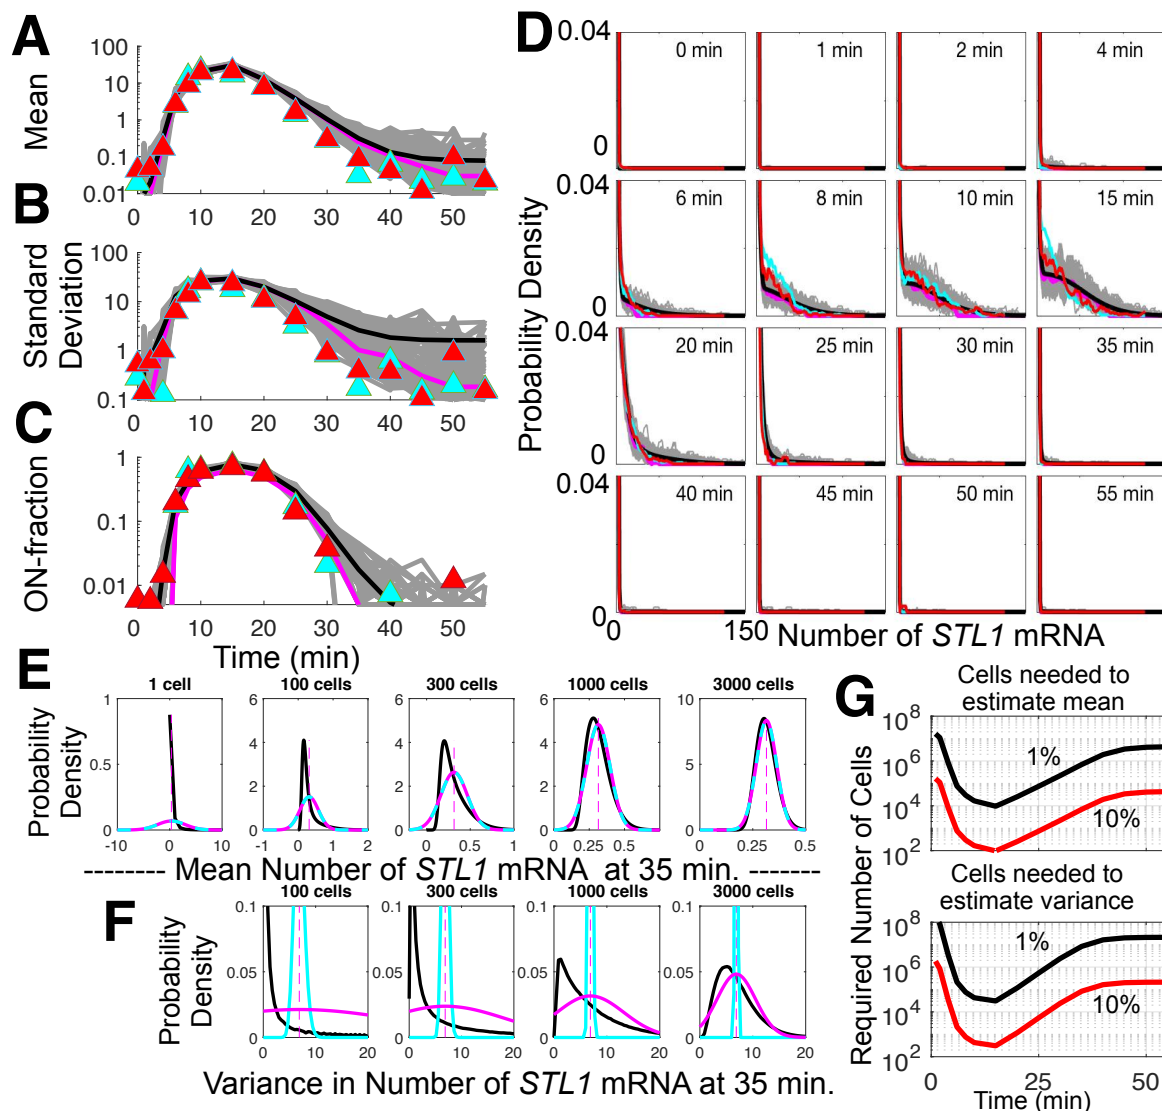

615  
 616 **Figure 3. Discrete positive distributions introduce uncertainty and bias in parameter**  
 617 **estimation.** (A) Mean, (B) standard deviation, (C) ON-fraction, and (D) full distributions  
 618 of *STL1* mRNA versus time for an osmotic shock of 0.2M NaCl applied at time  $t = 0$ . Theoretical  
 619 values are in black, representative simulated samples of 200 cells each are in gray, median statistics  
 620 of the simulated samples are in magenta; and experimental biological replica data are in red and  
 621 cyan. (E,F) Expected distribution of sample mean (E) and sample variance (F) for *STL1* at 35  
 622 minutes computed using the CLT using Gaussian approximation (cyan), an extended moment  
 623 analysis (magenta), or exact sampling from the FSP (black) for population sizes of 1, 100, 300,  
 624 1000, and 3000 cells. (G) Expected number of cells required to estimate the mean (top) or variance  
 625 (bottom) within standard errors of 10% (red) or 1% (black). The dependence on time is due to the  
 626 changing distribution shapes shown in Panel D.

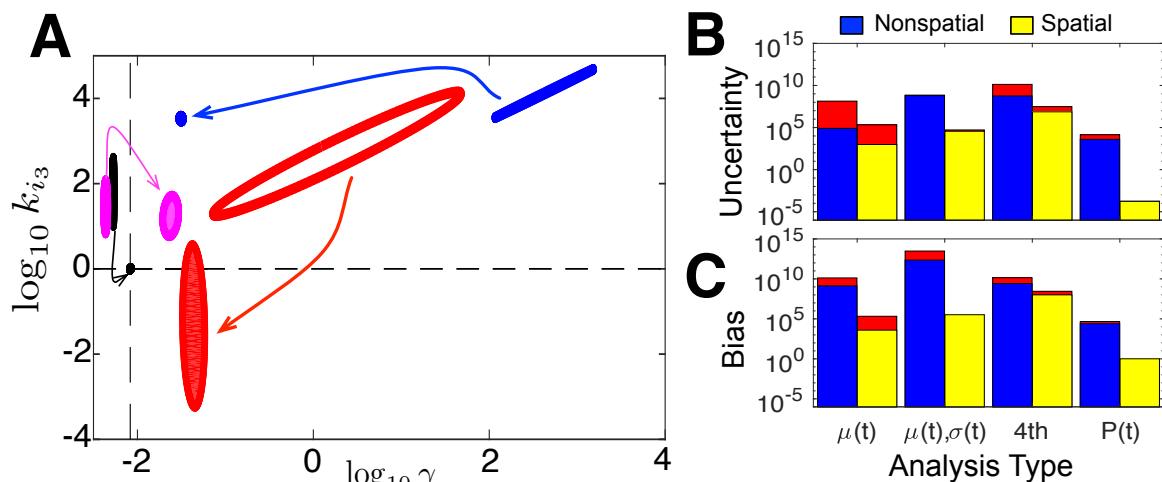

**Predictions** for *STL1* transcription site activity versus time and NaCl.

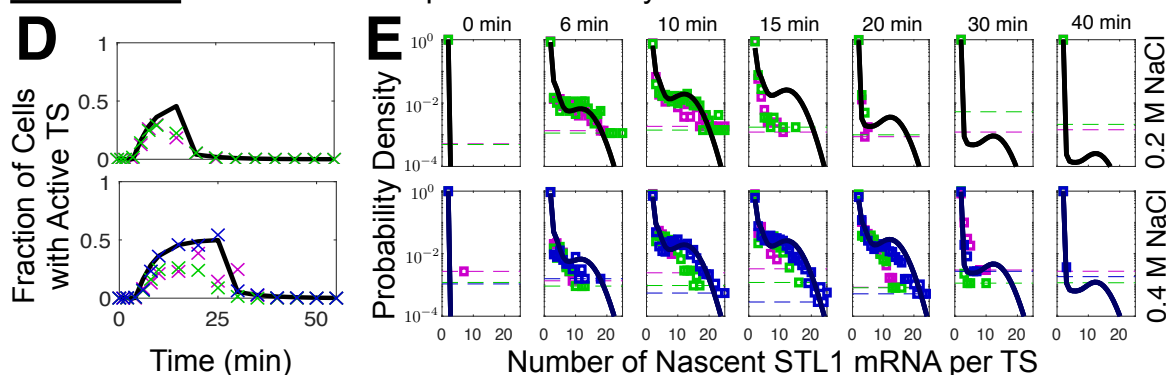

627  
628

629 **Figure 4. Stochastic and spatial fluctuation information improve parameter estimation to**  
 630 **enable precise quantitative predictions.** (A) Ninety percent confidence ellipses for the  
 631 degradation rate ( $\gamma$ ) and the maximal transcription initiation rate ( $k_{i3}$ ) using the means only ( $\mu(t)$ ,  
 632 red), means and variances ( $\mu(t), \Sigma(t)$  blue), extended moment analyses (4th, magenta), or the full  
 633 FSP distributions ( $\mathbf{P}(t)$ , black). Arrows show the effect of adding spatial information to the  
 634 analyses. The dashed black lines show the fit parameters for the spatial FSP *STL1* model. (B) Total  
 635 parameter uncertainty and (C) bias for the four analyses using non-spatial (blue) and spatial  
 636 (yellow) analyses. The red regions show the difference between independent MHA chains. (D)  
 637 Predicted (black) and measured (magenta, green and blue crosses) fractions of cells with active  
 638 *STL1* TS versus time at 0.2M (top) NaCl and 0.4M (bottom) NaCl osmotic shock. (E) Predicted  
 639 (black) and measured (magenta, green and blue) distributions of nascent *STL1* mRNA per TS at  
 640 different times following 0.2M (top) NaCl and 0.4M (bottom) NaCl osmotic shock. Magenta,  
 641 green and blue horizontal lines correspond to the minimum detection limit ( $1/N_c$ , where  $N_c$  is the  
 642 number of cells measured at that time for the corresponding biological replica). All predictions are  
 643 made using parameters estimated previously from the mature, spatial mRNA distributions.

## Supplementary Materials for

### Distribution Shapes Govern the Discovery of Predictive Models for Gene Regulation

Brian E. Munsky, Guoliang Li, Zachary R. Fox, Douglas P. Shepherd, Gregor Neuert

correspondence to: munsky@colostate.edu and gregor.neuert@vanderbilt.edu

## Contents

|          |                                                                                                                                                 |          |
|----------|-------------------------------------------------------------------------------------------------------------------------------------------------|----------|
| <b>1</b> | <b>Materials and Methods – Experimental</b>                                                                                                     | <b>3</b> |
| 1.1      | Yeast strain and growth conditon . . . . .                                                                                                      | 3        |
| 1.2      | Microscopy setup for time-lapse and single molecule RNA FISH imaging . . . . .                                                                  | 3        |
| 1.3      | Image aquisition for time-lapse and single molecule RNA FISH imaging . . . . .                                                                  | 3        |
| 1.4      | Sample preparation for live cell time-lapse microscopy . . . . .                                                                                | 3        |
| 1.5      | Image analysis for time-lapse microscopy . . . . .                                                                                              | 3        |
| 1.6      | Sample preparation for single-molecule RNA-FISH . . . . .                                                                                       | 4        |
| 1.7      | Image analysis for single-molecule RNA-FISH . . . . .                                                                                           | 5        |
| 1.8      | RNA-FISH data analysis . . . . .                                                                                                                | 5        |
| <b>2</b> | <b>Methods–Computational</b>                                                                                                                    | <b>6</b> |
| 2.1      | Parameterizing the Hog1p signal . . . . .                                                                                                       | 6        |
| 2.2      | Gene regulation model . . . . .                                                                                                                 | 6        |
| 2.3      | Computation of statistical moments of gene regulation fluctuations . . . . .                                                                    | 7        |
| 2.3.1    | First and second moments . . . . .                                                                                                              | 7        |
| 2.3.2    | Higher moments of gene regulation fluctuations . . . . .                                                                                        | 8        |
| 2.4      | FSP computation of probability densities of gene regulation fluctuations . . . . .                                                              | 9        |
| 2.5      | Computation of Likelihood Functions – Moments Analyses . . . . .                                                                                | 9        |
| 2.5.1    | Application of Central Limit Theory . . . . .                                                                                                   | 9        |
| 2.5.2    | Likelihood to observe measured means . . . . .                                                                                                  | 10       |
| 2.5.3    | Likelihood to observe measured (co)variances . . . . .                                                                                          | 11       |
| 2.5.4    | Comparison of the $\chi^2$ /Wishart distributions and multivariate Gaussian approaches<br>for the likelihoods of the first two moments. . . . . | 13       |
| 2.6      | Likelihood to observe measured distributions . . . . .                                                                                          | 14       |
| 2.7      | Parameter searches to maximize likelihood . . . . .                                                                                             | 15       |
| 2.8      | Comparison of results for different likelihood functions (Table S5) . . . . .                                                                   | 15       |
| 2.9      | Metropolis Hastings algorithm to quantify parameter uncertainties . . . . .                                                                     | 15       |
| 2.9.1    | Convergence . . . . .                                                                                                                           | 15       |
| 2.9.2    | MCMC Results . . . . .                                                                                                                          | 16       |
| 2.10     | Fisher Information analysis . . . . .                                                                                                           | 16       |
| 2.11     | Predictions of Transcription Site activity . . . . .                                                                                            | 17       |
| 2.11.1   | Simplified theoretical model of average TS polymerase loading . . . . .                                                                         | 17       |
| 2.11.2   | Extended FSP model of nascent transcription . . . . .                                                                                           | 18       |
| 2.11.3   | Identification of mRNA elongation rate . . . . .                                                                                                | 18       |

## List of Figures

|    |                                                 |    |
|----|-------------------------------------------------|----|
| S1 | Hog1p nuclear signal versus time. . . . .       | 21 |
| S2 | <i>STL1</i> distributions versus time . . . . . | 22 |
| S3 | <i>CTT1</i> distributions versus time . . . . . | 23 |

|     |                                                                                    |    |
|-----|------------------------------------------------------------------------------------|----|
| S4  | Joint nuclear and cytoplasmic <i>STLI</i> distributions versus time . . . . .      | 24 |
| S5  | Joint nuclear and cytoplasmic <i>CTTI</i> distributions versus time . . . . .      | 25 |
| S6  | Excessive skewness permitted by the extended moments analysis . . . . .            | 26 |
| S7  | <i>CTTI</i> and <i>STLI</i> statistics and model predictions versus time . . . . . | 27 |
| S8  | Density of likelihood samples for Metropolis Hastings analysis . . . . .           | 28 |
| S9  | Bias and uncertainty in <i>STLI</i> models . . . . .                               | 29 |
| S10 | Bias and uncertainty in <i>CTTI</i> models . . . . .                               | 30 |
| S11 | Overall bias and uncertainty and TS predictions for <i>CTTI</i> . . . . .          | 31 |
| S12 | Comparison of FSP and SSA for TS predictions . . . . .                             | 32 |

## List of Tables

|    |                                                                        |    |
|----|------------------------------------------------------------------------|----|
| S1 | Locations for smRNA-FISH probes . . . . .                              | 33 |
| S2 | Parameterization of the Hog1p signal . . . . .                         | 34 |
| S3 | Parameters identified for <i>STLI</i> model . . . . .                  | 35 |
| S4 | Parameters identified for <i>CTTI</i> model . . . . .                  | 36 |
| S5 | Values of likelihoods functions for different parameter sets . . . . . | 37 |
| S6 | Elongation rates identified from <i>CTTI</i> TS data . . . . .         | 38 |

# 1 Materials and Methods – Experimental

## 1.1 Yeast strain and growth condition

*Saccharomyces cerevisiae* BY4741 (*MATa*; *his3Δ1*; *leu2Δ0*; *met15Δ0*; *ura3Δ0*) was used for time-lapse microscopy and FISH experiments. Three days before the experiment, yeast cells from a stock of cells stored at -80°C were streaked out on a complete synthetic media plate (CSM, Formedia, UK). The day before the experiment, a single colony from the CSM plate was inoculated in 5 ml CSM medium (pre-culture). After 6-12h, the optical density (OD) of the pre-culture was measured and the cells were diluted into new CSM medium to reach an OD of 0.5 the next morning. To assay the nuclear enrichment of Hog1 in single cells over time in response to osmotic stress, a yellow-fluorescent protein (YFP) was tagged to the C-terminus of endogenous Hog1 in BY4741 cells through homologous DNA recombination [1] [2].

## 1.2 Microscopy setup for time-lapse and single molecule RNA FISH imaging

Cells were imaged with a Nikon Ti Eclipse epifluorescence microscope equipped with perfect focus (Nikon), a 100x VC DIC lens (Nikon), fluorescent filters for YFP, DAPI, TMR and CY5 (Semrock), an X-cite 120 fluorescent light source (Excelitas), and an Orca Flash 4v2 CMOS camera (Hamamatsu). The microscope was controlled by Micro-Manager program [3].

## 1.3 Image acquisition for time-lapse and single molecule RNA FISH imaging

For live cell time-lapse microscopy the microscope was operated in constant focus mode. Bright field images were taken every 10 s with an exposure time of 10 ms and the YFP fluorescent images are taken every 1 minute with an exposure time of 20 ms. For single molecule RNA-FISH microscopy, z-stacks of images from fixed yeast cells for bright field, DAPI, TMR and CY5 were taken with each image in the z-stack separated by 200 nm. For each sample, multiple positions on the slide were imaged to ensure large numbers of cells.

## 1.4 Sample preparation for live cell time-lapse microscopy

1.5 ml of yeast cells with Hog1-YFP in log-phase growth (OD=0.5) were pelleted by centrifugation, resuspended in 20  $\mu$ l CSM medium, and loaded into a flow chamber as described in [4]. The media passing through the flow chamber was removed through a syringe (New Era Pump Systems) connected to a pump (pump rate 0.1 ml/minute) at the exit of the flow chamber. On the input of the flow chamber, a two-way valve was connected to switch between a beaker with CSM media and a beaker with CSM medium with a fixed concentration of NaCl (0.2M or 0.4M).

## 1.5 Image analysis for time-lapse microscopy

Each image from the fluorescent tagged Hog1-kinase (Hog1-YFP) was used to generate a background image by running a disk smoothing filter over the image. The background image was subtracted from the original YFP image to enhance contrast. This image was then smoothed twice with a median filter. From this image the mean pixel intensity for pixels above 50 counts was computed. This value serves as a threshold to convert the YFP image into a binary image in which high intensity YFP signal that is enriched in the nucleus, is used as a nuclear marker. The bright field image was smoothed with a disk filter to generate a background image. The background image was subtracted from the original brightfield image to enhance contrast. The processed YFP image and the processed brightfield image were combined using morphological reconstruction, and cells were segmented with a watershed algorithm. Cells that are too small, too big, or too close to the image borders were removed. This process was repeated for

each image. After segmentation, the centroid of each cell was computed and stored. Next, the distance between each centroid for each of the two consecutive images was compared. The cells in the two images that have the smallest distance were considered the same cell at two different time points. This whole procedure was repeated for each image resulting in single cell trajectories. For each cell the average per pixel fluorescent intensity of the whole cell ( $I_w$ ) and of the top 100 brightest fluorescent pixels ( $I_t$ ) was recorded as a function of time. In addition, fluorescent signal per pixel of the camera background ( $I_b$ ) was reported. The Hog1 nuclear enrichment was then calculated as  $Hog1(t) = [(I_t(t) - I_b) / (I_w(t) - I_b)]$ . The single cell traces were smoothed and subtracted by the Hog1(t) signal on the beginning of the experiment. Next, each single cell trace was inspected and cells exhibiting large fluctuations due to poor cell segmentation and cell tracking were removed. During the time points when no fluorescent images were taken, the fluorescent signal from the previous time point was used to segment the cell. Taking images every 10 s with an exposure time of 10 ms using bright field imaging did not result in photobleaching of the fluorescent signal and resulted in better tracking reliability because cells had not moved significantly since the previous image. For cell volume measurements, each time trace was removed of outlier points that resulted from segmentation uncertainties. Volume change relative to the volume at the beginning of the experiment was calculated to compare cells of different volumes. For both, the single-cell volume and Hog1(t) fluorescent traces, the median and the average median distance (standard deviation of the median) was computed to put less weight on sporadic outliers due to the image segmentation process. The final time-lapse microscopy data set consist of 246 (0.2M NaCl) and 167 (0.4M NaCl) cells. Each time course was measured in duplicates or triplicates.

## 1.6 Sample preparation for single-molecule RNA-FISH

Yeast cell culture (*BY4741* WT) in log-phase growth ( $OD = 0.5$ ) was concentrated 10X ( $OD = 5$ ) by a glass filter system with a  $0.45 \mu\text{m}$  filter (Millipore). Cells were exposed to a final osmolyte concentration of 0.2 M and 0.4 M NaCl, and then fixed in 4 % formaldehyde at time points 0, 1, 2, 4, 6, 8, 10, 15, 20, 25, 30, 35, 40, 45, 50, 55 minutes. At each time point, cells (5 ml) in the corresponding beaker were poured into a 15 ml falcon tube containing formaldehyde, resulting in cell fixation. Cells were fixed at +20C for 30 minutes, then transferred to +4C and fixed overnight on a shaker. After fixation, cells are centrifuged at 500 xg for 5 minutes, and then the liquid phase was discarded. The cell pellet was resuspended in 5 ml ice-cold Buffer B (1.2 M sorbitol, 0.1 M potassium phosphate dibasic, pH 7.5) and centrifuged again. After discarding the liquid phase, yeast cells were resuspended in 1 ml Buffer B, and transferred to 1.5 ml centrifugation tubes. Cells were then centrifuged again at 500 xg for 5 minutes and the pellet was resuspended in 0.5 ml Spheroplasting Buffer (Buffer B, 0.2 %  $\beta$ mercaptoethanol, 10 mM Vanadyl-ribonucleoside complex). The OD of each sample was measured and the total cell number for each sample was equalized. 10  $\mu\text{l}$  of 2.5 mg/ml Zymolyase (US Biological) was added to each sample on a +4C block. Cells were incubated on a rotor for 20-40 minutes at +30C until the cell wall was digested. The cells turn from an opaque to a black color if they are digested. Cells were monitored under the microscope every 10 minutes after addition of Zymolyase and when 90 % of the cells turned black, cells were transferred to the +4C block to stop Zymolyase activity. Cells were centrifuged for 5 minutes, then the cell pellet was resuspended with 1 ml ice-cold Buffer B and spun down for 5 minutes at 500 xg. After discarding liquid phase, the pellet was gently re-suspended with 1 ml of 70 % ethanol and kept at +4C for at least 12 hours or stored until needed at +4C. Hybridization and RNA-FISH probe preparation conditions were applied as published [5]. Table S1 contains the RNA-FISH probes for *STL1* and *CTT1*. Each time course was measured in duplicate or triplicate.

## 1.7 Image analysis for single-molecule RNA-FISH

To segment cells and to define the cells nuclear and cytoplasmic compartment the following steps were taken. For each DAPI image stack, a maximum intensity projection was generated. A DAPI intensity threshold was picked by eye to identify the maximum number of nuclei in the image. Based on this threshold, the image was then converted into a binary image. Connected regions (nuclei) that were too big or too small were removed. Connected regions in the image were then labeled by individual numbers resulting in individual numbered nuclei. Next, for each connected region three individual DAPI thresholds were computed as 40 (low threshold) and 50 (middle threshold) % of the difference between the maximum DAPI signal minus the background DAPI signal. Through this iterative and cell specific thresholding, cell-to-cell differences in nuclei DNA concentration and DAPI staining were taken into account. For the transcription site analysis, the low threshold was used. For the determination of the nuclear and cytoplasmic joint probability mRNA distribution, the middle threshold was used. For each cell, the entire DAPI image stack was converted into a binary image stack using the cell specific DAPI thresholds resulting in 3D thresholded nucleus and cytoplasm. After the nucleus had been segmented, the last 5 images of the bright field image stack were maximum projected to generate the cell outlines. A background image was generated by running a disk smoothing filter over this image. The background image was subtracted from the maximum projected image to enhance contrast. This image was then combined with the thresholded DAPI image using morphological reconstruction and cells were segmented with a watershed algorithm. Cells that were too small, too big, or too close to the image borders were removed.

To identify RNA spots, fluorescent thresholds for RNA-FISH images were determined for each dye based on a single image plane, for each position imaged and for each sample. For a given dye, the mean threshold value was calculated based on the thresholds identified from each image in the data sets. This threshold was very reproducible from image to image and from person to person. After the threshold had been determined for each dye, each image in the stack was Gaussian filtered to remove noise, and then filtered with a laplacian of a Gaussian filter to detect punctuate in the image. These filtered images were then converted into binary images using the previously determined threshold. For each pixelated signal, the regional maxima was determined, which identifies the xyz-position of the RNA spot within each 3D image stack. This processes was repeated for each of the TMR and CY5 image stacks. The number of RNA spots for each cell in the cytoplasm or the nucleus was determined by applying the mask of segmented nucleus and cytoplasm on the filtered RNA-FISH image stacks in 3D. The numbers of RNA molecules in the nucleus and cytoplasm were counted for each individual cell.

In order to determine the number of transcripts of each transcription site, we determined the total intensity of each RNA spot in the cell. We also fitted each RNA spot with a 2D Gaussian function to determine the RNA spot intensity and found very good agreement between the fitted and the total RNA spot intensities. The total RNA-FISH data set consists of a total of 65454 single cells (25511 at 0.2M NaCl and 39943 at 0.4M NaCl).

## 1.8 RNA-FISH data analysis

For each time point, a distribution of mRNA molecules in single cells was determined as the marginal distribution of total *STL1* and *CTTI* mRNA or as the joint probability distribution of nuclear and cytoplasmic RNA. The distributions were also summarized in a binary data set of ON and OFF cells. Cells with three or more mRNA molecules were considered ON-cells for quantification of the ON-fraction. The population average was computed as the mean marginal cytoplasmic or nuclear RNA for each mRNA species.

To quantify transcription site intensities, we recorded the intensity of all spots in the nuclei for all cells. The brightest nuclear spots of each cell were labeled as potential transcription sites, and were temporarily removed from the data set. We then computed the median intensity for the remaining nuclear spots, and we used this median value to define the equivalent mature nuclear mRNA fluorescence intensity. Next,

we re-examined the brightest RNA spot in each nuclei (i.e., the potential transcription sites), and we computed the fluorescence intensity in units of mature mRNA intensities. Potential transcription sites that had intensities greater than the equivalent of two mature mRNA molecules were labeled as active transcription sites. This approach was applied to all cells from a single experiment. From this analysis, we computed the fraction of cells with an active transcription site as a function of time, the single-cell distributions of full length RNA transcripts per transcription site as a function of time, and the average number of full length RNA transcripts per transcription site as a function of time.

## 2 Methods–Computational

All computational analyses have been performed using Mathworks MATLAB. All analysis codes are downloadable at XXX and required data sets are available at YYY<sup>1</sup>. Once the files have been downloaded, all results and Figures (2-4 and S1-S11) can be generated by (1) opening MATLAB and navigating to the main directory, and running the function MUNSKY\_2017\_MAIN.M. This function will open a simple interface that allows the user to generate all figure and to manipulate system parameters.

### 2.1 Parameterizing the Hog1p signal

To model the temporally-varying Hog1p localization signal, we adopt the empirical model from [5]. In this model, the level for Hog1p(t) enrichment is assumed to have the form:

$$Hog1p^*(t) \equiv \left( \frac{Hog1p(t)}{1 + Hog1p(t)/M} \right)^\eta = A \left( \frac{(1 - e^{-r_1 t}) e^{-r_2 t}}{1 + \frac{(1 - e^{-r_1 t}) e^{-r_2 t}}{M}} \right)^\eta, \quad (1)$$

where  $A$  and  $M$  define the saturation height and midpoint and are the same for all salt levels. See the supplemental information of [5] for the derivation of this function.

The parameters  $\{r_1, \alpha, \eta, A, M\}$  have been fit to match the newly measured Hog1p nuclear enrichment levels as functions of time, and osmolyte concentrations. The parameters are given in Table S2, and the corresponding fits to the new experimental data are shown in Fig. S1. This time-varying signal has been used as an input to the gene regulation models below.

### 2.2 Gene regulation model

To capture the spatial stochastic expression of *STL1* or *CTT1* mRNA, we extend the four-state *Hog1p*-activated gene expression model identified in [5] to account for spatial localization of mRNA in the nucleus or cytoplasm (see Fig. 1A, 1B). The model consists of a single gene that can occupy one of four different transcriptional states ( $S_1, S_2, S_3, S_4$ ) and two chemical species: nuclear mRNA ( $m_{nuc}$ ), and cytoplasmic mRNA ( $m_{cyt}$ ). The gene can transition between the four possible states ( $S_j \rightarrow S_k$ ) with the rates,  $\{k_{jk}\}$ . The rate of the state transition  $S_2 \rightarrow S_1$  depends on the level of Hog1p according to the simple saturated linear form,

$$k_{21} \equiv \max \left\{ 0, k_{21}^{(0)} - k_{21}^{(1)} Hog1p(t - t_0) \right\}, \quad (2)$$

where  $t$  is the time following the addition of NaCl, and  $t_0$  is a time delay required to capture the short period between transcription initiation and dispersion of mature mRNA<sup>2</sup>. All other state transition rates are constant in time. Each state  $S_j$  allows transcription of mRNA in the nucleus with rate,  $k_{i,j}$ . For the spatial model, nuclear mRNA are transported to the cytoplasm with rate,  $\eta_r$ . mRNA are assumed to

<sup>1</sup>A GITHUB download page will be created upon acceptance of this manuscript.

<sup>2</sup>The time offset parameter  $t_0$  is only necessary for the non-spatial model and is identified as nearly zero for the spatial model.



degrade at the rate  $\gamma$ . For the spatial model, a second degradation rate  $\gamma_{\text{nuc}}$  is assumed for the nuclear region.

In total, there are 13 non-spatial or 15 spatial parameters in the model:

$$\Lambda \equiv \left[ k_{12}, k_{21}^{(0)}, k_{21}^{(1)}, k_{23}, k_{32}, k_{34}, k_{43}, k_{i_1}, k_{i_2}, k_{i_3}, k_{i_4}, \gamma, t_0, \eta_r, \gamma_{\text{nuc}} \right]. \quad (3)$$

For parameter uncertainty quantification, we assume an independent, log-uniform prior on all parameters, and all parameter searches are conducted in logarithmic space.

## 2.3 Computation of statistical moments of gene regulation fluctuations

In this section, we provide the sets of ordinary differential equations (ODE's) that describe the moments of the proposed model.

### 2.3.1 First and second moments

The analysis of the first two moments (i.e., the means, variances and covariances) are a special case of the general form for the higher order moments described below in Section 2.3.2. Let  $\mathbf{x}(t)$  denote the state of the system at any given time:

$$\mathbf{x}(t) \equiv [S_1(t), S_2(t), S_3(t), S_4(t), m_{\text{nuc}}(t), m_{\text{cyt}}(t)]^T. \quad (4)$$

For this study,  $\mathbf{x}$  is a vector of five (non-spatial) or six (spatial) discrete, non-negative integers. Chemical reactions are random events that take the system from one state to another:  $\mathbf{x}_i \rightarrow \mathbf{x}_j$ . Each  $\mu^{\text{th}}$  reaction can be described by its stoichiometry vector,  $\mathbf{s}_\mu$ , which describes the state change that occurs for that reaction (i.e.,  $\mathbf{s}_\mu = \mathbf{x}_j - \mathbf{x}_i$  if the  $\mu^{\text{th}}$  reaction goes from  $\mathbf{x}_i$  to  $\mathbf{x}_j$ ) and its propensity function  $w_\mu(\mathbf{x}, t)dt$ , which describes the probability that such a reaction would occur in the infinitesimally small time step,  $dt$ .

For the *non-spatial model*, there are six unique state transition stoichiometries, one transcription reaction, and one degradation reaction, for a total of eight unique stoichiometry vectors. These can be combined into the stoichiometry matrix:

$$\mathbf{S}_{\text{nonspatial}} \equiv \begin{bmatrix} -1 & 1 & 0 & 0 & 0 & 0 & 0 & 0 \\ 1 & -1 & -1 & 1 & 0 & 0 & 0 & 0 \\ 0 & 0 & 1 & -1 & -1 & 1 & 0 & 0 \\ 0 & 0 & 0 & 0 & 1 & -1 & 0 & 0 \\ 0 & 0 & 0 & 0 & 0 & 0 & 1 & -1 \end{bmatrix}, \quad (5)$$

in which each row corresponds to one of the state variables, and each column corresponds to a reaction. The corresponding propensity functions can also be written in matrix-vector form for the *nonspatial models* as:

$$\begin{aligned} \mathbf{w}_{\text{nonspatial}}(\mathbf{x}, t)dt &= \begin{bmatrix} k_{12} & 0 & 0 & 0 & 0 \\ 0 & k_{21}^{(0)} + k_{21}^{(1)} \text{Hog1p}(t) & 0 & 0 & 0 \\ 0 & k_{23} & 0 & 0 & 0 \\ 0 & 0 & k_{32} & 0 & 0 \\ 0 & 0 & k_{34} & 0 & 0 \\ 0 & 0 & 0 & k_{43} & 0 \\ k_{i_1} & k_{i_2} & k_{i_3} & k_{i_4} & 0 \\ 0 & 0 & 0 & 0 & \gamma \end{bmatrix} \begin{bmatrix} S_1(t) \\ S_2(t) \\ S_3(t) \\ S_4(t) \\ m(t) \end{bmatrix} dt \quad (6) \\ &= \mathbf{W}_1(t)\mathbf{x}(t)dt, \quad (7) \end{aligned}$$

Similarly, the spatial model has an additional two reactions corresponding to transport from the nucleus to the cytoplasm and an extra degradation term for the nuclear mRNA. The stoichiometry matrix for the *spatial model* can be written:

$$\mathbf{S}_{\text{spatial}} \equiv \begin{bmatrix} -1 & 1 & 0 & 0 & 0 & 0 & 0 & 0 & 0 & 0 \\ 1 & -1 & -1 & 1 & 0 & 0 & 0 & 0 & 0 & 0 \\ 0 & 0 & 1 & -1 & -1 & 1 & 0 & 0 & 0 & 0 \\ 0 & 0 & 0 & 0 & 1 & -1 & 0 & 0 & 0 & 0 \\ 0 & 0 & 0 & 0 & 0 & 0 & 1 & -1 & -1 & 0 \\ 0 & 0 & 0 & 0 & 0 & 0 & 0 & 0 & 1 & -1 \end{bmatrix}, \quad (8)$$

and the corresponding propensity functions can also be written as:

$$\mathbf{w}_{\text{spatial}}(\mathbf{x}, t) dt = \begin{bmatrix} k_{12} & 0 & 0 & 0 & 0 & 0 \\ 0 & k_{21}^{(0)} + k_{21}^{(1)} \text{Hog1}p(t) & 0 & 0 & 0 & 0 \\ 0 & k_{23} & 0 & 0 & 0 & 0 \\ 0 & 0 & k_{32} & 0 & 0 & 0 \\ 0 & 0 & k_{34} & 0 & 0 & 0 \\ 0 & 0 & 0 & k_{43} & 0 & 0 \\ k_{i_1} & k_{i_2} & k_{i_3} & k_{i_4} & 0 & 0 \\ 0 & 0 & 0 & 0 & \gamma_{\text{nuc}} & 0 \\ 0 & 0 & 0 & 0 & \eta_r & 0 \\ 0 & 0 & 0 & 0 & 0 & \gamma \end{bmatrix} \begin{bmatrix} S_1(t) \\ S_2(t) \\ S_3(t) \\ S_4(t) \\ m_{\text{nuc}}(t) \\ m_{\text{cyt}}(t) \end{bmatrix} dt \quad (9)$$

$$= \mathbf{W}_1(t)\mathbf{x}(t)dt, \quad (10)$$

With these definitions, the time-varying means  $\boldsymbol{\mu}(t) = \mathbb{E}\{\mathbf{x}(t)\}$  of all species and the corresponding covariance matrix  $\boldsymbol{\Sigma}(t) = \mathbb{E}\{[\mathbf{x}(t) - \boldsymbol{\mu}(t)][\mathbf{x}(t) - \boldsymbol{\mu}(t)]^T\}$  can be computed by integrating the linear ordinary differential equations:

$$\frac{d}{dt}\boldsymbol{\mu}(t) = \mathbf{S}\mathbf{W}_1(t)\boldsymbol{\mu}(t) \quad (11)$$

$$\frac{d}{dt}\boldsymbol{\Sigma}(t) = \mathbf{S}\mathbf{W}_1(t)\boldsymbol{\Sigma}(t) + \boldsymbol{\Sigma}(t)\mathbf{W}_1(t)^T\mathbf{S}^T + \mathbf{S}\text{diag}(\mathbf{W}_1\boldsymbol{\mu}(t))\mathbf{S}^T. \quad (12)$$

This integration has been performed using Mathworks MATLAB.

### 2.3.2 Higher moments of gene regulation fluctuations

In order to compute the likelihood to observe the first two moments of gene regulation fluctuations, it is necessary to compute the third and fourth moments of the fluctuations as well. These higher moments can also be described by a set of linear ODEs as follows. Let  $\mathbb{E}\{\mathbf{x}^\beta\}$  denote a higher order uncentered moment of the random vector  $\mathbf{x}$ :

$$\mathbb{E}\{\mathbf{x}^\beta\} \equiv \mathbb{E}\{x_1^{\beta_1} \cdot x_2^{\beta_2} \cdots x_N^{\beta_N}\}. \quad (13)$$

With this definition the dynamics of  $\mathbb{E}\{\mathbf{x}^\beta\}$  can be shown to evolve according to the differential equation [6, 7]:

$$\frac{d}{dt}\mathbb{E}\{\mathbf{x}^\beta\} = \frac{d}{dt}\mathbb{E}\{x_1^{\beta_1} \cdot x_2^{\beta_2} \cdots x_N^{\beta_N}\} = \mathbb{E}\left\{\sum_{\mu} w_{\mu}(\mathbf{x}, t) \left(\prod_i^N (x_i + S_{i,\mu})^{\beta_i} - \prod_i^N x_i^{\beta_i}\right)\right\}. \quad (14)$$

In the special case where all propensity functions are first order, then Eqn. 14 represents a closed system of equations, which can be integrated to solve for the first four uncentered moments.

## 2.4 FSP computation of probability densities of gene regulation fluctuations

To compute the full time varying probability distributions, we use a slightly different notation. Let  $\mathbf{y}(t) = [i, j, k]$  denote the state of the system where  $i$  is the index of the current gene state,  $S_i$ ,  $j$  is the number of nuclear mRNA, and  $k$  is the number of cytoplasmic mRNA. Let  $P(\mathbf{y}(t)|\mathbf{A}, \mathbf{P}_0)$  denote the probability of the state  $\mathbf{y}$  at time  $t$  conditioned upon the model  $\mathbf{A}$  and the initial probability distribution at  $t = 0$ , given by the vector  $\mathbf{P}_0$ . For the 4-state model examined in this study, the index  $i$  can take four different values,  $i \in \{1, 2, 3, 4\}$ , and  $m_{\text{nuc}}$  and  $m_{\text{cyt}}$  could be any non-negative integer value,  $\{0, 1, 2, \dots\}$ . The chemical master equation [8] can be written:

$$\frac{d}{dt}P(\mathbf{y}, t) = - \sum_{\mu} w_{\mu}(\mathbf{y}, t)P(\mathbf{y}, t) + \sum_{\mu} w_{\mu}(\mathbf{y} - \mathbf{s}_{\mu}, t)P(\mathbf{y} - \mathbf{s}_{\mu}, t), \quad (15)$$

where the sum is over all possible reactions.

We enumerate all possible states in the set  $\{\mathbf{y}_1, \mathbf{y}_2, \dots\}$ , and we define the corresponding probability density mass vector as:  $\mathbf{P}(t) = [P_1(t), P_2(t) \dots]^T$ . Using the Finite State Projection analysis [9, 10], we truncate the full probability mass vector to a finite set where the number of mRNA in the nucleus and cytoplasm are each bounded by finite numbers,  $N_{\text{nuc}}$  and  $N_{\text{cyt}}$ . We utilize use a nested enumeration, given by  $\mathbf{y}_{I(i,j,k)} = [i, j, k]$ , where  $I(i, j, k) = N_{\text{states}}(N_{\text{nuc}} + 1)k + N_{\text{states}}j + i$ .

With this enumeration, the Chemical Master Equation can be written in vector form as:  $\frac{d}{dt}\mathbf{P}(t) = \mathbf{Q}(t)\mathbf{P}(t)$ . We solve this equation in MATLAB using the stiff ODE solver, ODE15S. For comparison of the model to the experimental mRNA distributions, it is necessary to convert the  $\mathbf{P}(t)$  into a marginal distribution of nuclear and cytoplasmic mRNA numbers. This is relatively easy to do, since

$$\rho_{\text{nuc,cyt}}(t) \equiv P(mRNA_{\text{nuc}} = j, mRNA_{\text{cyt}} = k|t) = \sum_{i=1}^{N_{\text{states}}} P_{I(i,j,k)}(t). \quad (16)$$

The FSP approach and moments analyses were verified to match all moments up to fourth order, each within 0.002%.

Now with this definition, we can compare model predictions and experimental data as described below.

## 2.5 Computation of Likelihood Functions – Moments Analyses

For a population sample of  $N_S$  cells in which the mRNA has been measured as  $\{x_1, x_2, \dots, x_{N_S}\}$ , the measured sample mean ( $\mu_S$ ) and unbiased sample variance estimate ( $\sigma_S^2$ ) are:

$$\mu_S(t) \equiv \frac{1}{N_S} \sum_{i=1}^{N_S} x_i(t) \quad (17)$$

$$\sigma_S^2(t) \equiv \frac{1}{N_S - 1} \sum_{i=1}^{N_S} (x_i(t) - \mu_S(t))^2. \quad (18)$$

### 2.5.1 Application of Central Limit Theory

The moment analyses discussed in this article (i.e., Eqns. 12 and 14) provide exact expressions for the dynamics of the model's means, variances, covariances and higher moments. Because the reaction rates are all linear, these moment equations are closed, and the moments can be computed with no assumption on the distribution shape. To compare these computed moments to measured experimental data requires computation of the likelihood that the measured moments (e.g., means or covariance matrix) would have been observed by chance given that the model were correct. The standard practice for such a computation

is either to assume Gaussian deviations or to apply the Central Limit Theorem (CLT) as follows. Let  $\tilde{x}_i$  be a set of independent and identically distributed random variables with finite mean,  $\mu$ , and finite variance,  $\sigma^2$ , and let  $\tilde{y}$  be the average of  $N_S$  such random numbers.

According to the CLT, as  $N_S$  becomes very large, the distribution of  $\tilde{y}_{N_S}$  will approach a normal distribution with a mean of  $\mu$  and a variance of  $\sigma^2/N_S$ . The CLT allows us to estimate the likelihood of the observed moments as discussed in the following sections. We note that if  $\tilde{x}_i$  is normally distributed, then  $\tilde{y}_{N_S}$  would be normally distributed for any number of cells. However, in the case where  $\tilde{x}_i$  is very far from normally distributed (e.g., when its distribution has a very long asymmetric tail) then a larger number of cells will be required before the CLT becomes valid. Such is the situation observed for the later time points in Fig. 3, which result in poor estimation of the moments-based likelihood function.

## 2.5.2 Likelihood to observe measured means

### 2.5.2.1. Univariate Case – Non-Spatial Model

Assuming a finite variance,  $\sigma^2(t)$ , and a large numbers of cells,  $N_S$ , the CLT states that the sample mean of a population of cells will have a distribution that can be approximated by a normal distribution with mean  $\mu_m$  and variance  $\sigma^2(t)/N_S$ :

$$P(\mu_S|\mathcal{M}) = \sqrt{\frac{N_S}{2\pi\sigma^2}} \exp\left(\frac{-(\mu_S - \mu_{\mathcal{M}})^2}{2\sigma^2/N_S}\right), \quad (19)$$

where  $\mathcal{M}$  denotes the model under consideration. Taking the logarithm of this likelihood function yields:

$$\log P(\mu_S|\mathcal{M}) = \frac{1}{2} (\log N_S - \log(2\pi) - \log(\sigma^2)) - \frac{(\mu_S - \mu_{\mathcal{M}})^2}{2\sigma^2/N_S}. \quad (20)$$

We can now compute the log likelihood of the averaged data given our model (up to a constant,  $C_1$ ), provided that: (1) we can compute the mean, and (2) the variance is known:

$$\log P(\mu_S|\mathcal{M}) = C_1 - \frac{1}{2} \log(\sigma^2) - \frac{(\mu_S - \mu_{\mathcal{M}})^2}{2\sigma^2/N_S}. \quad (21)$$

In the case where we are only using the average measurements to constrain the model, we replace the variance with the sample variance estimate:

$$\log P_{[\mu \text{ only}]}(\mu_S|\mathcal{M}) \approx C_1 - \frac{1}{2} \log(\sigma_S^2) - \frac{(\mu_S - \mu_{\mathcal{M}})^2}{2\sigma_S^2/N_S} \quad (22)$$

$$= \hat{C}_1 - \frac{(\mu_S - \mu_{\mathcal{M}})^2}{2\sigma_S^2/N_S}. \quad (23)$$

In this expression, all terms that do not depend upon the model mean,  $\mu_{\mathcal{M}}$ , have been lumped into the constant  $\hat{C}_1$ .

### 2.5.2.2. Multivariate Case – Spatial Model

The spatial model has  $n = 2$  observables: nuclear and cytoplasmic mRNA levels, but the analysis is quite similar. When the number of cells in each sample,  $N_S$ , is large, the distribution of the sample mean vector,  $\boldsymbol{\mu}_S$ , given the model can be approximated by a multivariate normal distribution with mean,  $\boldsymbol{\mu}_{\mathcal{M}}$ , and covariance  $(1/N_S)\boldsymbol{\Sigma}$ . The likelihood of observing the measured mean at a given time point can be written

$$P(\boldsymbol{\mu}_S|\mathcal{M}) = \sqrt{\frac{N_S^n}{(2\pi)^n |\boldsymbol{\Sigma}|}} \exp\left(\frac{-N_S}{2} (\boldsymbol{\mu}_S - \boldsymbol{\mu}_{\mathcal{M}})^T \boldsymbol{\Sigma}^{-1} (\boldsymbol{\mu}_S - \boldsymbol{\mu}_{\mathcal{M}})\right), \quad (24)$$

where the notation  $|\Sigma|$  denotes the determinant of the covariance matrix,  $\Sigma$ . Taking the logarithm of this likelihood and collecting terms that do not depend on  $\mu_{\mathcal{M}}$  or  $\Sigma$  into a constant yields:

$$\log P(\mu_S | \mathcal{M}) = C_2 - \frac{1}{2} \log |\Sigma| - \frac{N_S}{2} (\mu_S - \mu_{\mathcal{M}})^T \Sigma^{-1} (\mu_S - \mu_{\mathcal{M}}). \quad (25)$$

To attempt to identify the model without computation of the second moments, we must approximate  $\Sigma$  with the measured sample covariance estimate:

$$\Sigma \approx \Sigma_S = \frac{1}{N_S - 1} \sum_{i=1}^{N_S} (\mathbf{x}_i - \mu_S)(\mathbf{x}_i - \mu_S)^T. \quad (26)$$

For this special case, the likelihood reduces to:

$$\log P_{[\mu \text{ only}]}(\mu_S | \mathcal{M}) \approx C_2 - \frac{1}{2} \log |\Sigma_S| - \frac{N_S}{2} (\mu_S - \mu_{\mathcal{M}})^T \Sigma_S^{-1} (\mu_S - \mu_{\mathcal{M}}). \quad (27)$$

$$= \hat{C}_2 - \frac{N_S}{2} (\mu_S - \mu_{\mathcal{M}})^T \Sigma_S^{-1} (\mu_S - \mu_{\mathcal{M}}). \quad (28)$$

As in the previous case, all terms that do not depend upon the model mean,  $\mu_{\mathcal{M}}$ , have been lumped into the constant  $\hat{C}_2$ .

### 2.5.3 Likelihood to observe measured (co)variances

To estimate model parameters using the gene expression variance, it is necessary to compute the likelihood that we would observe the measured *sample variance* given the model. For a single observable variable (e.g., non-spatial model for a single mRNA species), the sample variance,  $\sigma_S^2$ , will be a random variable that depends upon the distribution of the number of mRNA per cell at the corresponding time-point.

In this work, we consider two different CLT-based approaches to approximate the likelihood to observe the measured sample variances. The first method assumes that the likelihood of the observed sample variance can be well approximated by a  $\chi$ -squared distributed random variable, which is independent of the sample mean. This approximation would be exact if the underlying distribution had a Gaussian distribution. This approximation of the likelihood depends only upon the model's computation of the first two moments. The second method approximates the sample mean and sample (co)variances as multivariate Gaussian random variables [7], whose covariance depends upon the first four moments of the analysis (thus the need for the extended moments analysis described in Section 2.3.2). These analyses are described in greater detail as follows:

#### 2.5.3.1. Univariate Case – $\chi^2$ distribution approximation.

Using the assumption that the sample population is sufficiently large that  $\sum_{i=1}^{N_S} x_i$  has a normal distribution, one could approximate the probability of observing the measured sample variance using the  $\chi$ -squared distribution with  $\kappa = N_S - 1$  degrees of freedom:

$$P(\xi) = \frac{1}{2^{\kappa/2} \Gamma\left(\frac{\kappa}{2}\right)} \xi^{\frac{\kappa}{2}-1} e^{-\frac{\xi}{2}}, \quad (29)$$

where  $\xi = (N_S - 1)\sigma_S^2/\sigma_{\mathcal{M}}^2$ , and  $\kappa = N_S - 1$ . Or by change of variables, this can be written:

$$P(\sigma_S^2 | \mathcal{M}) = \frac{(N_S - 1)}{\sigma_{\mathcal{M}}^2} \frac{1}{2^{(N_S-1)/2} \Gamma\left(\frac{(N_S-1)}{2}\right)} \left(\frac{(N_S - 1)\sigma_S^2}{\sigma_{\mathcal{M}}^2}\right)^{\frac{(N_S-1)}{2}-1} e^{-\left(\frac{(N_S-1)\sigma_S^2}{2\sigma_{\mathcal{M}}^2}\right)} \quad (30)$$

$$= \frac{1}{2^{(N_S-1)/2} \sigma_S^2 \Gamma\left(\frac{(N_S-1)}{2}\right)} \left(\frac{(N_S - 1)\sigma_S^2}{\sigma_{\mathcal{M}}^2}\right)^{\frac{(N_S-1)}{2}} e^{-\left(\frac{(N_S-1)\sigma_S^2}{2\sigma_{\mathcal{M}}^2}\right)} \quad (31)$$

The logarithm of the likelihood of the observed sample variance ( $\sigma_S^2$ ) given the model variance ( $\sigma_M^2$ ) is:

$$\log P_{[\mu \text{ and } \sigma^2]}(\sigma_S^2 | \mathcal{M}) = C_3 - \frac{N_S - 1}{2} \log(\sigma_M^2) - \frac{(N_S - 1)\sigma_S^2}{2\sigma_M^2}, \quad (32)$$

where  $C_3$  is the collection of all terms that do not depend upon  $\mu$  or  $\sigma_M^2$ .

### 2.5.3.2. Multivariate Case – Wishart distribution approximation.

To estimate the likelihood function for the observed variance and covariances in the multivariate case, we use a generalization of the  $\chi$ -squared distribution (Eqn. 31), known as the Wishart distribution [11]. To define this likelihood function, let  $\Sigma_M$  represent the covariance matrix generated by the model. Let  $\mathbf{X}_S$  represent an  $N_S$  by  $n$  centered matrix of the measured data for  $N_S$  different independent measurements of  $n$  distinct chemical species:

$$\mathbf{X}_S = \begin{bmatrix} x_{1,1} - \mu_1 & x_{1,2} - \mu_2 & \dots & x_{1,n} - \mu_n \\ x_{2,1} - \mu_1 & x_{2,2} - \mu_2 & \dots & \vdots \\ \vdots & \vdots & \ddots & \vdots \\ x_{N_S,1} - \mu_1 & x_{N_S,2} - \mu_2 & \dots & x_{N_S,n} - \mu_n \end{bmatrix} \quad (33)$$

Define  $\mathbf{S}_S$  as the  $n \times n$  scatter matrix of the data,  $\mathbf{S}_S = \mathbf{X}_S^T \mathbf{X}_S$ . With these definitions, the Wishart distribution over the range of possible  $\mathbf{S}$  can be written:

$$P(\mathbf{S}_S | \mathcal{M}) = \frac{1}{2^{\kappa n/2} \Gamma_n\left(\frac{\kappa}{2}\right)} \frac{|\mathbf{S}_S|^{\frac{\kappa-n-1}{2}}}{|\Sigma_M|^{\frac{\kappa}{2}}} \exp\left(-\frac{\text{trace}(\Sigma_M^{-1} \mathbf{S}_S)}{2}\right), \quad (34)$$

where  $\kappa = N_S - 1$  is the degrees of freedom.

Taking the logarithm of Eqn. 34 and collecting all terms that are independent of  $\Sigma_M$  yields:

$$\log P_{[\mu \text{ and } \Sigma]}(\mathbf{S}_S | \mathcal{M}) = C_4 - \frac{\kappa}{2} \log |\Sigma_M| - \frac{\text{trace}(\Sigma_M^{-1} \mathbf{S}_S)}{2}. \quad (35)$$

Using the relationship  $\Sigma_S = (N_S - 1)^{-1} \mathbf{S}_S$ , this reduces to a form analogous to that for the univariate case in Equation 32:

$$\log P_{[\mu \text{ and } \Sigma]}(\Sigma_S | \mathcal{M}) = C_4 - \frac{N_S - 1}{2} \log |\Sigma_M| - \frac{(N_S - 1)\text{trace}(\Sigma_M^{-1} \Sigma_S)}{2}. \quad (36)$$

### 2.5.3.3. Likelihood to observe measured means and (co)variances using the $\chi$ -squared/Wishart approximation.

Assuming a (multivariate) normal distribution for the number of nuclear and cytoplasmic mRNA, the sample means and the sample variances (covariance matrix) would be statistically independent. Therefore, the log-likelihood to match both statistics for the univariate case is the sum of Eqns. 21 and 32 over all time points  $k = \{1, 2, \dots, K\}$ :

$$\log P_{[\mu \text{ and } \sigma^2]}(\mu_S, \sigma_S^2 | \mathcal{M}) = C - \sum_{k=1}^K \left( \frac{N_k - 2}{2} \log \sigma_M^2(t_k) + \frac{N_k (\mu_S(t_k) - \mu_M(t_k))^2}{2 \sigma_M^2(t_k)} \dots \right. \\ \left. + \frac{(N_k - 1)\sigma_S^2(t_k)/\sigma_M^2(t_k)}{2} \right). \quad (37)$$

Similarly, in the multivariate case, the log-likelihood to match both the measured sample mean vector,  $\boldsymbol{\mu}_S$ , and the measured sample covariance matrix,  $\boldsymbol{\Sigma}_S$ , can be found from the sum of Eqns. 28 and 36:

$$\log P_{[\boldsymbol{\mu} \text{ and } \boldsymbol{\Sigma}]}(\boldsymbol{\mu}_S, \boldsymbol{\Sigma}_S | \mathcal{M}) = C - \sum_{k=1}^K \left( \frac{N_k - 2}{2} \log |\boldsymbol{\Sigma}_{\mathcal{M}}| + \frac{N_k}{2} (\boldsymbol{\mu}_S - \boldsymbol{\mu}_{\mathcal{M}})^T \boldsymbol{\Sigma}_{\mathcal{M}}^{-1} (\boldsymbol{\mu}_S - \boldsymbol{\mu}_{\mathcal{M}}) \dots + \frac{(N_k - 1) \text{trace}(\boldsymbol{\Sigma}_S \boldsymbol{\Sigma}_{\mathcal{M}}^{-1})}{2} \right). \quad (38)$$

Naturally, Eqn. 38 reduces to Eqn. 37 in the case of a single chemical species.

#### 2.5.3.4. Likelihood to observe measured means and (co)variances using a multivariate Gaussian approximation.

For strongly skewed distributions (e.g., those measured in this study), the sample mean and sample variance both depend strongly upon the experimental sampling of the distribution tails. As a result, these statistics are not statistically independent. To account for this interdependence, the CLT may be used to approximate the joint likelihood of the sample means and sample (co)variances as a multivariate normally-distributed random vector. For two measured species (e.g., nuclear and cytoplasmic mRNA), this vector has five elements ( $\mathbf{z} \equiv [\mu_1, \mu_2, \sigma_{11}, \sigma_{12}, \sigma_{22}]$ ), and its probability distribution can be written in the form [7]:

$$P(\mathbf{z}_S | \mathcal{M}) = (2\pi)^{-5/2} |\mathbf{Q}_{\mathcal{M}}|^{-1/2} \exp \left( -\frac{1}{2} (\mathbf{z}_S - \mathbf{z}_{\mathcal{M}})^T \mathbf{Q}_{\mathcal{M}}^{-1} (\mathbf{z}_S - \mathbf{z}_{\mathcal{M}}) \right) \quad (39)$$

where  $\mathbf{z}_S$  is the vector of measured means, variances and covariances;  $\mathbf{z}_{\mathcal{M}}$  is the corresponding model-predicted average of those statistics; and  $\mathbf{Q}_{\mathcal{M}}$  is the model-predicted covariance matrix for those statistics. The matrix  $\mathbf{Q}_{\mathcal{M}}$  can be defined in terms of the second through fourth order moments as follows [7]:

$$\mathbf{Q}_{\mathcal{M}} \equiv \frac{1}{N_S} \begin{bmatrix} \sigma_{11} & \sigma_{12} & \sigma_{111} & \sigma_{112} & \sigma_{122} \\ \sigma_{12} & \sigma_{22} & \sigma_{112} & \sigma_{122} & \sigma_{222} \\ \sigma_{111} & \sigma_{112} & \sigma_{1111} - \frac{N_S-3}{N_S-1} \sigma_{11}^2 & \sigma_{1112} - \frac{N_S-3}{N_S-1} \sigma_{11} \sigma_{12} & \sigma_{1122} - \frac{N_S-3}{N_S-1} \sigma_{11} \sigma_{22} \\ \sigma_{112} & \sigma_{122} & \sigma_{1112} - \frac{N_S-3}{N_S-1} \sigma_{11} \sigma_{12} & \sigma_{1122} - \frac{N_S-2}{N_S-1} \sigma_{12}^2 + \frac{1}{N_S-1} \sigma_{11} \sigma_{22} & \sigma_{1222} - \frac{N_S-3}{N_S-1} \sigma_{12} \sigma_{22} \\ \sigma_{122} & \sigma_{222} & \sigma_{1122} - \frac{N_S-3}{N_S-1} \sigma_{11} \sigma_{22} & \sigma_{1222} - \frac{N_S-3}{N_S-1} \sigma_{12} \sigma_{22} & \sigma_{2222} - \frac{N_S-3}{N_S-1} \sigma_{22}^2 \end{bmatrix}_{\mathcal{M}}, \quad (40)$$

where  $\sigma_{\beta_1 \dots \beta_N}$  is used to denote the  $(\sum \beta_i)^{\text{th}}$  centered moment:

$$\sigma_{\beta_1 \dots \beta_N} \equiv \mathbb{E} \left\{ \prod_{i=1}^N (x_i - \mathbb{E}\{x_i\})^{\beta_i} \right\}. \quad (41)$$

Under this approximation, the logarithm of the the likelihood can be written:

$$\log(P(\mathbf{z}_S | \mathcal{M})) = C - \frac{1}{2} \log |\mathbf{Q}_{\mathcal{M}}| - \frac{1}{2} (\mathbf{z}_S - \mathbf{z}_{\mathcal{M}})^T \mathbf{Q}_{\mathcal{M}}^{-1} (\mathbf{z}_S - \mathbf{z}_{\mathcal{M}}), \quad (42)$$

and the log-likelihood for all time points,  $k = 1, \dots, K$  can be written:

$$\log P_{\text{MV-Gaussian}}(\{\mathbf{z}(t_k)\} | \mathcal{M}) = C - \frac{1}{2} \sum_{k=1}^K (\log |\mathbf{Q}_{\mathcal{M}}(t_k)| + (\mathbf{z}_S(t_k) - \mathbf{z}_{\mathcal{M}}(t_k))^T \mathbf{Q}_{\mathcal{M}}^{-1}(t_k) (\mathbf{z}_S(t_k) - \mathbf{z}_{\mathcal{M}}(t_k))). \quad (43)$$

#### 2.5.4 Comparison of the $\chi^2$ /Wishart distributions and multivariate Gaussian approaches for the likelihoods of the first two moments.

For the analysis of *CTTI* mRNA, the extension of the moments analyses to include the third and fourth moments led to identification of parameters that were  $10^{93,900}$  times less likely to account for the full

measured mRNA distributions compared to the analysis using the FSP analysis (Table S5 and Section 2.8). Moreover, this result was  $10^{63,300}$  times less likely to account for the distribution data than was the model identified by the much simpler  $\chi^2$  approach (Table S5). Similar deleterious effects were observed for the spatial *STL1* and *CTT1* analyses, although inclusion of the third and fourth moments led to some improvement in the case of non-spatial *STL1* analysis, for which the skewness had the greatest effect as shown in Figs. 3 and S7.

Recall from the main text that the model is unable to fit the means and variances exactly due to the difficulty to estimate those statistics due to high skewness. In order to compensate for this mismatch, the extended first-four moments approach identifies very large 3rd and 4th moments. However, these higher moments are not directly constrained by the data, and they are severely over-estimated (as opposed to under estimated as they were in the  $\chi^2$  and Wishart distribution based approaches). As a result, the extended model provided excellent fits to the means, but fits to all other statistics are much worse as shown in Fig. S6. In principle, this could be corrected by using data from the 3rd and 4th moments to add additional constraints to the model, but such an approach would be problematic for two reasons: (1) the measurement of the 3rd and 4th moments are prone to even greater sampling error than are the first two moments; and (2) in order to compute the likelihood to observe the third and fourth moments requires computation of even higher moments, which increases the computational complexity and makes such analysis impractical for the current model.

Because the extended moments analysis requires greater computational effort to compute while providing worse predictions to the full distributions in most cases, we have restricted the majority of our discussion to the simpler moments-based analyses.

## 2.6 Likelihood to observe measured distributions

Because the FSP approach provides a direct computation of the model's probability distribution, the FSP-based computation of the likelihood of the measured data is much more straightforward, and it does not require any assumptions of the distributions' shapes. To define this likelihood function, suppose that  $n_c$  cells,  $c = [1, 2, \dots, n_c]$ , were measured for a given experiment and time point, and each cell was found to have exactly  $m_{\text{nuc}}(c)$  copies nuclear mRNA and  $m_{\text{cyt}}(c)$  copies cytoplasmic mRNA. Suppose that a model with parameter set  $\mathbf{A}$ , predicts that for each time and experiment, the probability that a given cell has exactly  $m_{\text{nuc}}(c)$  nuclear mRNAs and  $m_{\text{cyt}}(c)$  in the corresponding conditions is  $p(m_{\text{nuc}}(c), m_{\text{cyt}}(c)|\mathbf{A})$ . The total likelihood of all observations,  $L(\mathbf{D}|\mathbf{A})$ , is the product over every cell, or

$$L(\mathbf{D}|\mathbf{A}) = \prod_{c=1}^{n_c} p(m_{\text{nuc}}(c), m_{\text{cyt}}(c)|\mathbf{A}). \quad (44)$$

Now that we know how likely it is that the data comes from a model and a given set of parameters,  $\mathbf{A}$ , our goal is to find the parameter set,  $\mathbf{A}_{\text{Fit}}$ , which maximizes this likelihood (or equivalently the logarithm of this likelihood):

$$\mathbf{A}_{\text{Fit}} = \operatorname{argmax}_{\mathbf{A}} \log(L(\mathbf{D}|\mathbf{A})) \quad (45)$$

$$= \operatorname{argmax}_{\mathbf{A}} \sum_{c=1}^{n_c} \log p(m_{\text{nuc}}(c), m_{\text{cyt}}(c)|\mathbf{A}). \quad (46)$$

Under the assumption that cells are independent, and because each cell is measured only once using the smFISH technique, the log-likelihood that the model matches all experiments at all time points is the sum of the log-likelihoods of the individual experiments and time points.



## 2.7 Parameter searches to maximize likelihood

In order to conduct parameter searches, we use iterative combinations of simplex based searches (e.g., MATLAB's "fminsearch" function) and genetic algorithm based searches. All parameters were defined to have positive values, and searches were conducted in logarithmic space. The searches are run multiple times from different starting parameter guesses leading to many tens of millions of function evaluations ( $> 4 \times 10^7$  evaluations of the means and moments analyses,  $> 5 \times 10^6$  evaluations of the non-spatial FSP distributions, and  $> 1 \times 10^6$  evaluations for the more computationally expensive analyses of extended moments and the spatial FSP distributions). Parallel fits were conducted on clusters of more than 128 processors at a time allowing for the consideration of several millions of model/ parameter/ experiment combinations per day.

## 2.8 Comparison of results for different likelihood functions (Table S5)

Table S5 shows the relative log-likelihood values for different likelihoods that compare the means, means and variances, extended moments, or full distributions. Each row corresponds to a different combination of gene and identification strategy. Each column corresponds to a different likelihood function (i.e., means, means and (co)variances, extended moments, or full distributions). Values presented are  $\log_{10}$  of the actual likelihoods relative to the best value found for that specific objective function.

The 'Distributions' *column* of Table S5 quantifies the relative log-likelihood that the identified parameter set matches *all data* of that type (i.e., spatial or nonspatial). More negative numbers denote worse matches to the full data. For example, in the non-spatial analysis of *CTT1*, the  $\chi^2$  and extended moments-based approaches were respectively  $10^{30,600}$  and  $10^{93,900}$  times less likely to account for the full data than was the model identified by the FSP approach. In other words, the full data was  $10^{63,300}$  times less likely to have come from the model identified using the extended moments than it was to have come from the simpler  $\chi^2$ -based analysis.

The Full FSP distributions *row* of Table S5 shows the relative likelihood of the Full FSP Distribution parameters when compared to the best fit for each of the different likelihood functions. This quantity provides an estimate of the probability that each likelihood function would have discovered the FSP parameters by chance. One interesting observation from this perspective is that although the extended moments analyses produce worse fits to the full data, this effect is somewhat mitigated by the fact that the extended analysis yields greater uncertainties (see also Figs. 4B, S8-S10). In other words, the extended analysis leads to worse fits to the full data, but this is coupled with lower confidence in these poor results.

## 2.9 Metropolis Hastings algorithm to quantify parameter uncertainties

To quantify the parameter uncertainties, we used the Metropolis Hastings algorithm [12], which is a standard Markov Chain Monte Carlo (MCMC) algorithm for parameter uncertainty estimation. All MCMC parameter explorations were conducted in logarithmic parameter space, and all analyses (i.e., means, means and variances, or distributions, both spatial and non-spatial) used the same proposal distribution for the MCMC chains. This proposal distribution was a symmetric normal distribution (in logarithmic space) with a variance of 0.005 (also in logarithmic space). For each parameter proposal, a random selection of parameters were selected to change, where each parameter had a 50% chance to be perturbed. The first half of each chain was discarded as an MCMC burnin period, and all chains were thinned by 90%.

### 2.9.1 Convergence

MCMC chains for the means, simpler moments analyses, and non-spatial FSP analyses were run for MH chains with combined lengths of  $>25,000,000$  parameter evaluations. MCMC analyses for the more

computationally expensive extended moment analyses were run for combined lengths of >1,500,000 parameter evaluations. MCMC analyses for the most computationally expensive spatial distribution analyses were run for a combined length of >3,700,000 parameter evaluations. To evaluate convergence of the MCMC analyses, we have split the multiple MCMC chains into two disjoint sets. To illustrate the achieved convergence, Figures S8 shows the distributions of likelihood values for these two independent MCMC compilations for each analysis and for *STL1* and *CTT1*. Thus, all 32 MHA analyses (2 replicas  $\times$  2 genes  $\times$  4 statistical analyses  $\times$  2 spatial analyses) were confirmed to have sampled similar distributions of log-likelihood space.

## 2.9.2 MCMC Results

Figures S9 and S10 summarize the biases and pairwise parameter uncertainties for the *STL1* and *CTT1* analyses and for each of the eight different analyses (means, means and variances, extended moments, and distributions)  $\times$  (spatial and non-spatial).

The vectors in Figs. S9 and S10 represent the fold over- or under-estimation bias for the corresponding parameter. The matrices in Figs. S9 and S10 represent the variances (diagonal entries) and covariances (off-diagonal entries) of the parameter estimation uncertainty, as estimated using the Metropolis Hastings algorithm. For example, the figure shows that non-spatial means analysis overestimates the  $k_{i_3}$  and  $\gamma$  parameters ('+' symbols in the corresponding biases), is highly uncertain in the estimate of  $k_{i_3}$  (yellow box in the covariance matrix diagonal corresponding to that parameter), and the uncertainties in parameters  $k_{i_3}$  and  $\gamma$  are positively correlated ('+' symbol in corresponding off-diagonal entries of the covariance matrix). The open red ellipse plotted in Figs. 4A visually depicts the same information by plotting the 90% confidence parameter interval, assuming a lognormal posterior distribution with the MCMC-estimated pairwise covariance matrix.

The *total bias* shown in Figs. 4C and S11C was defined by the euclidean distance in logarithmic space according to the expression:

$$d_{\text{bias}} \equiv 10 \sqrt{\sum \left[ \log_{10} \left( \frac{\lambda_i}{\tilde{\lambda}_i} \right) \right]^2}, \quad (47)$$

where  $\{\lambda_i\}$  is the average of the  $i^{\text{th}}$  estimated parameter, and  $\{\tilde{\lambda}_i\}$  is the corresponding 'true' parameters (i.e., the maximum likelihood estimate using all data and the spatial FSP analysis). The summation is taken over all parameters *except*  $k_{21}^{(0)}$  and  $k_{21}^{(1)}$ , which provide a non-unique determination of the Hog1p saturation effect,  $k_{i_1}$ , which is nearly zero and therefore highly uncertain in logarithmic space, and  $t_0$  whose interpretation is different for the spatial and non-spatial models. Conceptually, the value  $d_{\text{bias}}$  provides a quantification of the overall  $\pm$  fold changes for the collective parameters compared to their 'true' values.

The *total uncertainty* shown in Figs. 4B and S11B was defined by the trace of the covariance matrix. As was the case for the total bias quantification, the trace is taken over all parameters *except*  $k_{21}^{(0)}$ ,  $k_{21}^{(1)}$ ,  $k_{i_1}$ , and  $t_0$ .

## 2.10 Fisher Information analysis

The Fisher Information Matrix (FIM),  $\mathcal{I}(\mathbf{A})$ , and its inverse, the Cramér-Rao bound, is an analysis technique that describes the lower bound on the variance of an unbiased estimator. Recent works [7, 13, 14] have applied this tool in a biological context, looking at model sensitivity, robustness, identifiability, and experiment design. Here, we are concerned with the ability to identify models, which (1) only consider the means or the means and variances, and (2) assume a Gaussian likelihood function for the sample means

and variances. The FIM is defined for the parameter vector  $\mathbf{A} \equiv [\lambda_1, \lambda_2, \dots, \lambda_p]$  and likelihood  $L(\mathbf{D}|\mathbf{A})$  as

$$\mathcal{I}(\mathbf{A}) = \mathbb{E} \left\{ \left( \nabla_{\mathbf{A}} \log L(\mathbf{D}|\mathbf{A}) \right)^T \left( \nabla_{\mathbf{A}} \log L(\mathbf{D}|\mathbf{A}) \right) \right\}. \quad (48)$$

In this work, we have compared parameter uncertainties using posterior distributions of the parameters. The Cramér-Rao inequality states that the variances of these distributions must be less than or equal to the inverse of the FIM,  $\mathcal{I}(\mathbf{A})^{-1}$ . A model is unidentifiable if  $\mathcal{I}(\mathbf{A})^{-1}$  does not exist, i.e. if the FIM is singular [15].

For the models that consider means  $\boldsymbol{\mu}$ , means and variances,  $\boldsymbol{\mu}$  and  $\boldsymbol{\Sigma}$ , we have assumed Gaussian forms of the likelihood function, Eqns. 28 and 38. Under this assumption, the FIM is well-known. For a model which only describes the mean of the distribution, it is given by

$$\mathcal{I}(\mathbf{A})_{i,j}^{\boldsymbol{\mu}} = \mathbb{E} \left( \frac{\partial \boldsymbol{\mu}}{\partial \lambda_i} \right)^T \boldsymbol{\Sigma}_S^{-1} \left( \frac{\partial \boldsymbol{\mu}}{\partial \lambda_j} \right), \quad (49)$$

and when both means and variances are to be estimated with the model, the FIM is

$$\mathcal{I}(\mathbf{A})_{i,j}^{\boldsymbol{\mu}, \boldsymbol{\Sigma}} = \mathbb{E} \left\{ \left( \frac{\partial \boldsymbol{\mu}}{\partial \lambda_i} \right)^T \boldsymbol{\Sigma}_{\mathcal{M}}^{-1} \left( \frac{\partial \boldsymbol{\mu}}{\partial \lambda_j} \right) + \frac{1}{2} \text{trace} \left( \boldsymbol{\Sigma}_{\mathcal{M}}^{-1} \frac{\partial \boldsymbol{\Sigma}_{\mathcal{M}}}{\partial \lambda_i} \boldsymbol{\Sigma}_{\mathcal{M}}^{-1} \frac{\partial \boldsymbol{\Sigma}_{\mathcal{M}}}{\partial \lambda_j} \right) \right\}. \quad (50)$$

Given a set of independent samples at each experimentally measured time point, the FIM can be constructed at each time point by integrating Eqns. 11 and 12, and the total information is the sum over all the time points. For models of  $\boldsymbol{\mu}$  and  $\boldsymbol{\mu}$  and  $\boldsymbol{\Sigma}$ , we computed the FIM and found that them to be invertible, indicating that the parameters are in principle able to be identified.

## 2.11 Predictions of Transcription Site activity

We developed two analyses to predict transcription site (TS) activity: a simplified theoretical analysis of average active TS activity and an extended FSP analysis of distributions of polymerases on a given TS. These are described below. For both the data and the model, TS sites were considered to be ON if their predicted or measured intensities were greater than twice the intensity of a single mature mRNA.

### 2.11.1 Simplified theoretical model of average TS polymerase loading

Using the mRNA distribution analyses described above, we identified transcription initiation rates,  $\{k_{i_1}, k_{i_2}, k_{i_3}, k_{i_4}\}$  for the *CTT1* and *STL1* mRNA. For an elongation rate of  $k_{\text{elong}}$  and an mRNA length of  $L$ , each polymerase takes a time of  $\tau_{\text{elong}} = L/k_{\text{elong}}$  to complete transcription. Thus, polymerases that initiate transcription in the time window  $(t - \tau_{\text{elong}}, t)$  will be present at the TS at time  $t$ . For each gene, we selected the fastest identified transcription rate  $k_{i-\text{max}} = \max\{k_{i_1}, k_{i_2}, k_{i_3}, k_{i_4}\}$ . Assuming that an *active* TS is in the state with the maximum transcription rate, the average number of polymerases per active TS,  $\langle n_{\text{pol}} \rangle$ , can be computed as:

$$\langle n_{\text{pol}} \rangle = k_{i-\text{max}} \tau_{\text{elong}} = \frac{k_{i-\text{max}} L}{k_{\text{elong}}}. \quad (51)$$

In practice,  $L$  was chosen as the length from the first smFISH probe on the 5' end of the mRNA to the transcription termination site. In light of the fact that the smFISH probes are nearly equally distributed along the mRNA, we assume that nascent mRNA are on average half the length of their mature counterparts. Under this assumption we related  $n_{\text{pol}} = 2n_{\text{nascent}}$ , which allows us to relate the elongation rate to the observed spot intensities (in terms of mature mRNA) as:

$$\left\langle \frac{I_{\text{TS}}}{I_{\text{mature}}} \right\rangle = \langle n_{\text{nascent}} \rangle = \frac{k_{i-\text{max}} L}{2k_{\text{elong}}}. \quad (52)$$

### 2.11.2 Extended FSP model of nascent transcription

Next, we extended Finite State Projection approach in a form similar to that in [16]. To compute the distribution for the number of polymerases at the TS, we first compute the distribution of the gene states at the earlier time,  $t - \tau_{\text{elong}}$ . Using this distribution of gene states at  $t - \tau_{\text{elong}}$  and ignoring previous initiation events and excluding degradation of partially described mRNA, we use the FSP analysis derived above (but with no degradation or transport) to solve for the distribution of elongating polymerases per TS at the time  $t$ . We assume that each partially transcribed mRNA is at a random location in the gene, and it therefore has an effective intensity uniformly distributed between zero and the equivalent of one mRNA. To find the distribution of TS spot intensities with  $N_{\text{poly}}$  polymerases, we take the convolution of  $N_{\text{poly}}$  independent random variables, each with a uniform distribution between zero and one.

To confirm the FSP analysis, we also simulated the identified models using an adapted form of the Stochastic Simulation Algorithm (SSA, [17]) but with a modification similar to that proven in [18]. In each run of the SSA, we recorded the times of every simulated transcription initiation event. With this simulated information and an assumption of deterministic mRNA elongation with a given elongation rate, we compute the distance traveled by each polymerase as a function of time. If that length is longer than the length of the gene, then that polymerase is assumed to have completed transcription, in which case the mRNA is assumed to have dissociated from the TS. Otherwise, the length of the elongating mRNA and the known smFISH probe placements (Table S1) are used to determine how many probes are located along the partially transcribed nascent mRNA for that particular polymerase. The total TS intensity is then computed as the sum of the intensities for all polymerases on the gene in that cell and at that point in time.

The standard SSA approach [17] assumes constant propensity functions. In order to allow for time varying rates in the propensity functions (i.e., Eqn. 2), we added a fast reaction to the system. The stoichiometry of this reaction was zero, such that each firing of this null reaction does not affect the state of the system [18], but it does allow for frequent updates to the propensity functions. The rate of this reaction was set to  $1s^{-1}$ , which is more than two orders of magnitude faster than the characteristic rates of the Hog1p fluctuations in Eqn. 1. Figure S12 shows excellent agreement between the FSP and SSA analysis of the TS activity for *STL1* and *CTT1* transcription under 0.2M and 0.4M NaCl osmotic shock conditions.

### 2.11.3 Identification of mRNA elongation rate

In order to identify the transcription elongation rate, we computed the TS intensity distribution for *CTT1* at each point in time for 0.2M and 0.4M NaCl osmotic shock using the previously identified parameters (Table S4) and one free constant to describe the average elongation rate,  $k_{\text{elong}}$ . We then computed the probability that the observed distributions of *CTT1* TS intensities could have originated from this model at all time points and conditions. We then maximized this likelihood with respect to the rate  $k_{\text{elong}}$  for the different experimental replicas and NaCl concentrations to determine the uncertainty in this parameter. Using the simplified theoretical model, which does not account for transitions between active and inactive periods, we found an *upper bound* on the *CTT1* elongation rates to be  $91 \pm 9\text{Nt/s}$ . Using the more detailed spatial FSP approach, we found the *CTT1* elongation rates to be  $63 \pm 14\text{Nt/s}$ . For both cases, the uncertainty is given as the standard error of the mean using the five experimental replicas (two for 0.2M NaCl and three for 0.4M NaCl). We then fixed the elongation rate to be  $63\text{Nt/s}$ , and we used this rate in conjunction with the previously identified parameters to predict the TS intensity distributions for *CTT1* and *STL1* as functions of time in both osmotic shock conditions (Figs. 4D and S11D-H).

## Supplemental References

- [1] D. Muzzey, C. A. Gómez-Urbe, J. T. Mettetal, A. van Oudenaarden. ‘A Systems-Level Analysis of Perfect Adaptation in Yeast Osmoregulation’. *Cell*, **138**(1):160–171, 2009.
- [2] P. Ferrigno, F. Posas, D. Koepp, H. Saito, P. A. Silver. ‘Regulated nucleo/cytoplasmic exchange of HOG1 MAPK requires the importin  $\beta$  homologs NMD5 and XPO1’. *Embo J.*, **17**(19):5606–5614, 1998.
- [3] A. D. Edelstein, M. A. Tsuchida, N. Amodaj, H. Pinkard, R. D. Vale, N. Stuurman. ‘Advanced methods of microscope control using  $\mu$ Manager software’. *Journal of Biological Methods*, **1**(2):e10, 2014.
- [4] J. T. Mettetal, D. Muzzey, C. Gomez-Urbe, A. van Oudenaarden. ‘The Frequency Dependence of Osmo-Adaptation in *Saccharomyces cerevisiae*’. *Science*, **319**(5862):482–484, 2008.
- [5] G. Neuert, B. Munsky, R. Z. Tan, L. Teytelman, M. Khammash, A. van Oudenaarden. ‘Systematic Identification of Signal-Activated Stochastic Gene Regulation’. *Science*, **339**(6119):584–587, 2013.
- [6] J. P. Hespanha, A. Singh. ‘Stochastic models for chemically reacting systems using polynomial stochastic hybrid systems’. *International Journal of robust and nonlinear control*, **15**(15):669–690, 2005.
- [7] J. Ruess, A. Miliás-Argeitis, J. Lygeros. ‘Designing experiments to understand the variability in biochemical reaction networks’. *Journal of The Royal Society Interface*, **10**(88):20130588–20130588, 2013.
- [8] D. McQuarrie. ‘Stochastic Approach to Chemical Kinetics’. *J. Applied Probability*, **4**:413–478, 1967.
- [9] B. Munsky, M. Khammash. ‘The Finite State Projection Algorithm for the Solution of the Chemical Master Equation’. *The Journal of Chemical Physics*, **124**(4):044104, 2006.
- [10] B. Munsky, M. Khammash. ‘The Finite State Projection Approach for the Analysis of Stochastic Noise in Gene Networks’. *IEEE Trans. Automat. Contr./IEEE Trans. Circuits and Systems: Part 1*, **52**(1):201–214, 2008.
- [11] J. Wishart. ‘The Generalised Product Moment Distribution in Samples from a Normal Multivariate Population’. *Biometrika*, **20A**(1/2):32, 1928.
- [12] S. Chib, E. Greenberg. ‘Understanding the Metropolis-Hastings Algorithm’. *The American Statistician*, **49**(4):327–335, 1995.
- [13] M. Komorowski, M. J. Costa, D. A. Rand, M. P. H. Stumpf. ‘Sensitivity, robustness, and identifiability in stochastic chemical kinetics models.’ *Proceedings of the National Academy of Sciences*, **108**(21):8645–8650, 2011.
- [14] C. Zimmer. ‘Experimental Design for Stochastic Models of Nonlinear Signaling Pathways Using an Interval-Wise Linear Noise Approximation and State Estimation’. *PloS one*, **11**(9):e0159902, 2016.
- [15] T. J. Rothenberg. ‘Identification in Parametric Models’. *Econometrica*, **39**(3):577–591, 1971.
- [16] A. Senecal, B. Munsky, F. Proux, N. Ly, F. E. Braye, C. Zimmer, F. Mueller, X. Darzacq. ‘Transcription factors modulate c-Fos transcriptional bursts.’ *Cell Reports*, **8**(1):75–83, 2014.

- [17] D. T. Gillespie. ‘Exact stochastic simulation of coupled chemical reactions’. *J. Phys. Chem.*, **81**:2340–2361, 1977.
- [18] M. Voliotis, P. Thomas, R. Grima, C. G. Bowsher. ‘Stochastic Simulation of Biomolecular Networks in Dynamic Environments’. *arXiv:1511.01268*, 2015.

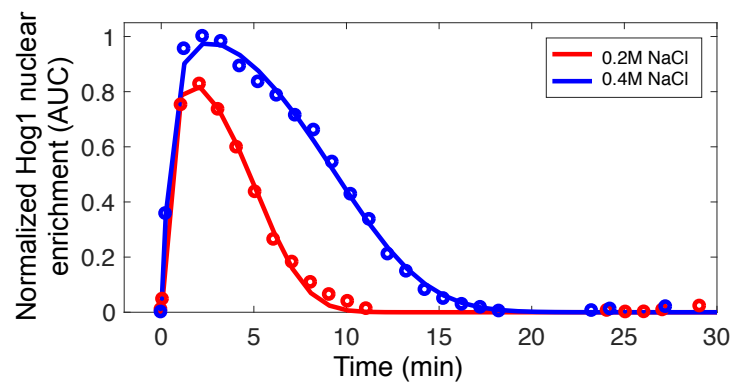

Figure S1: Normalized Hog1 nuclear enrichment after activation of the HOG-pathway with different NaCl concentrations. Solid lines denote the model (Eqns. 1) fit to the data points (symbols) for the two different osmolyte concentrations.

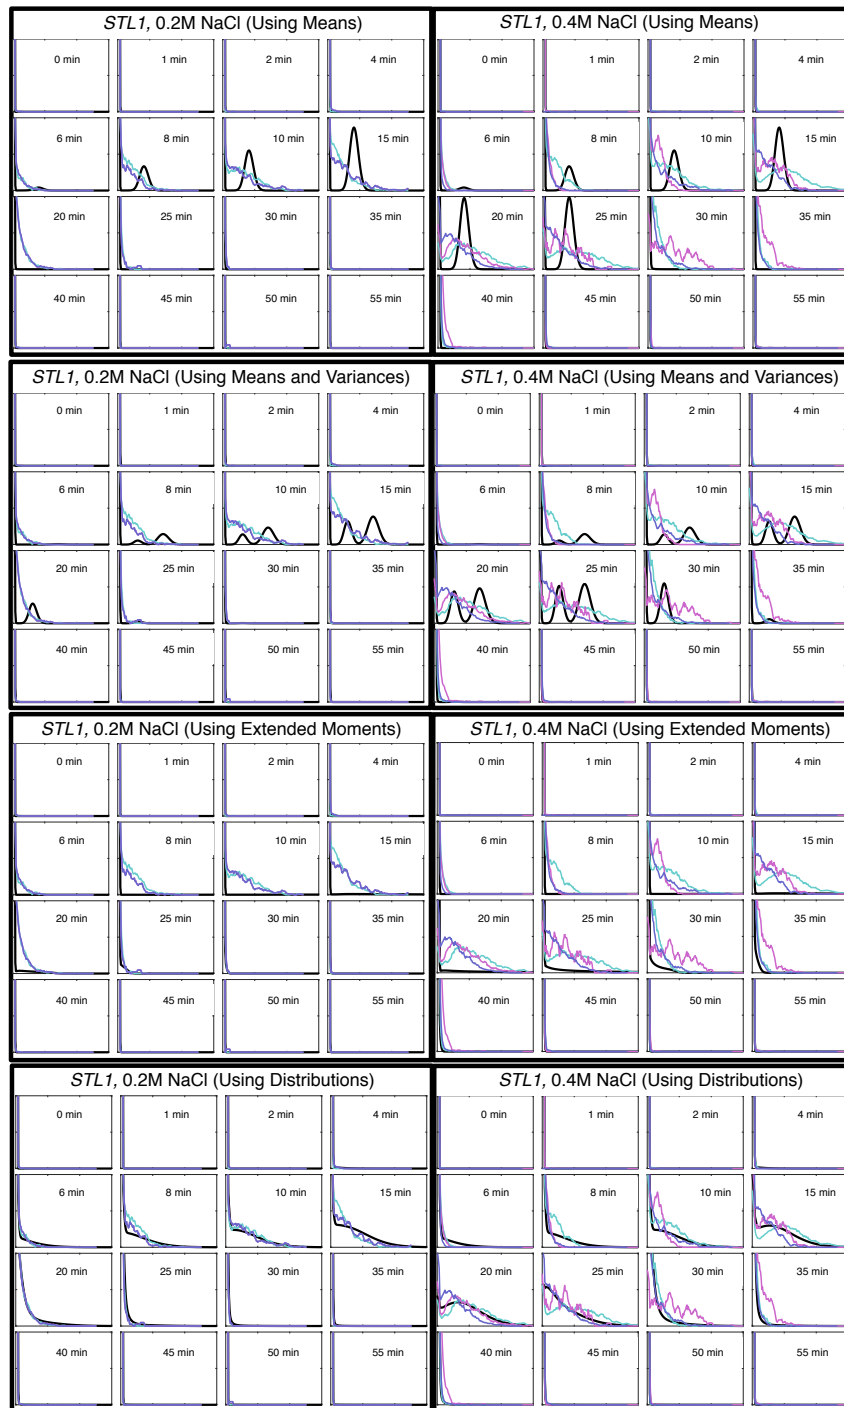

Figure S2: Experimental and model-generated distributions for the number of *STL1* per cell versus time for 0.2M NaCl (left) and 0.4M NaCl (right) osmotic shocks. Distributions have been generated using the models identified using means only (top row), means and variances using the  $\chi^2$  approach (second row), means and variances using the extended moments analysis (third row) or full distributions (bottom row). Model results are shown in black. Experimental data replicates shown in colors. Limits of all x-axes are 0 to 150 copies of mRNA. Limits of all y-axes are probability mass of 0 to 0.04.



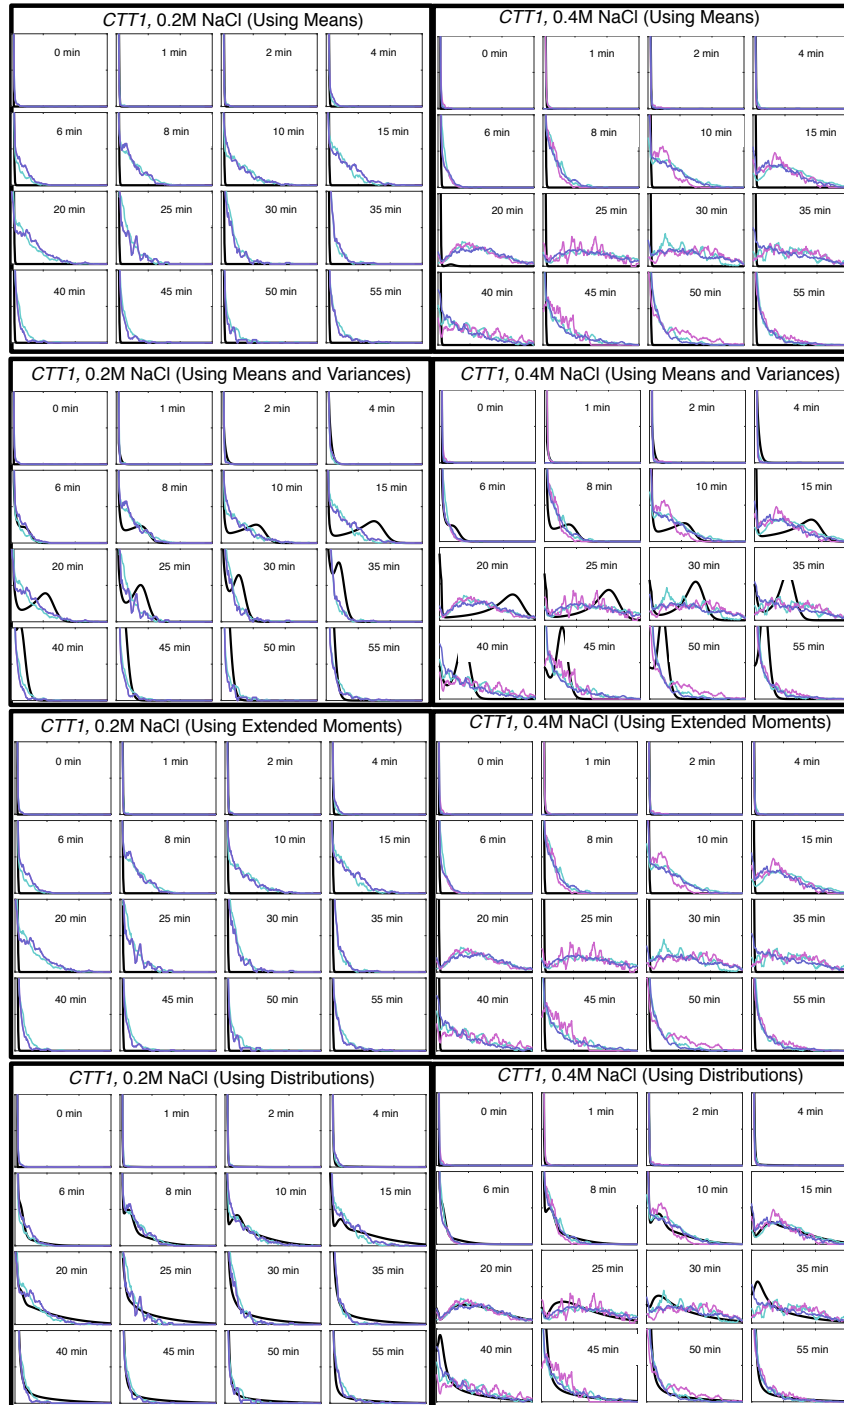

Figure S3: Experimental and model-generated distributions for the number of *CTT1* per cell versus time for 0.2M NaCl (left) and 0.4M NaCl (right) osmotic shocks. Distributions have been generated using the models identified using means only (top row), means and variances using the  $\chi^2$  approach (second row), means and variances using the extended moments analysis (third row) or full distributions (bottom row). Model results are shown in black. Experimental data replicates shown in colors. Limits of all x-axes are 0 to 150 copies of mRNA. Limits of all y-axes are probability mass of 0 to 0.04.

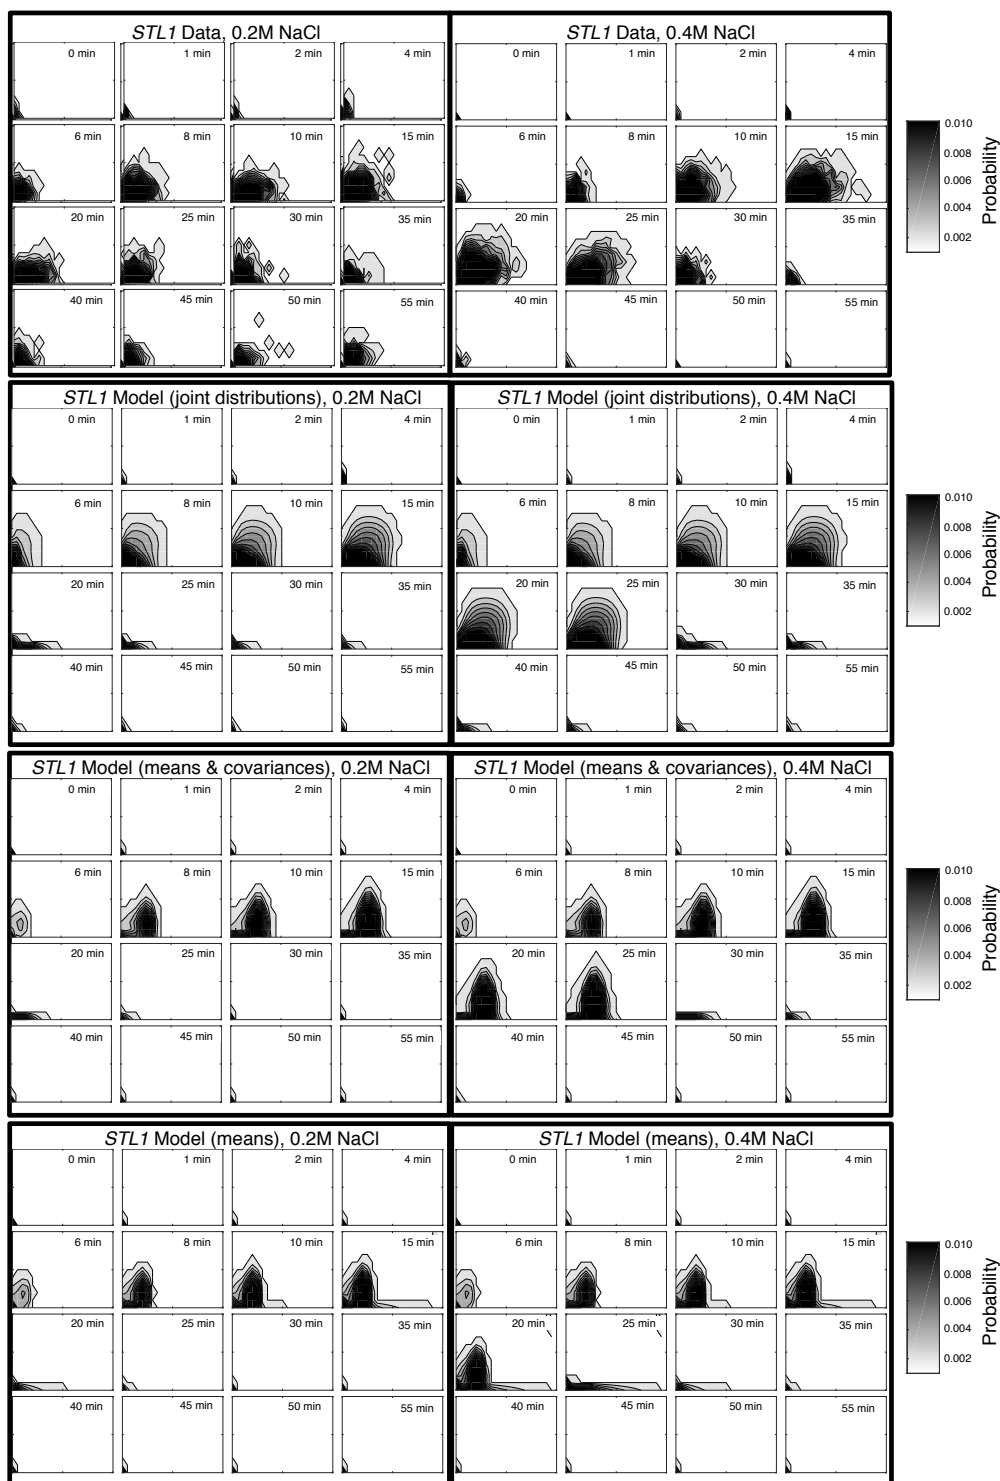

Figure S4: Experimental (top) and model-generated (bottom) joint distributions for *STL1* versus time for 0.2M NaCl (left) and 0.4M NaCl (right) osmotic shocks. Distributions have been generated using the model identified from the full joint distributions (row 2), the means and covariances (row 3) or the joint means (row 4). Limits of all x-axes are 0 to 200 copies of cytoplasmic mRNA. Limits of all y-axes are 0 to 10 copies of nuclear mRNA. All plots use the same contour levels (see legend to right). See Table S3 for the corresponding parameter sets.

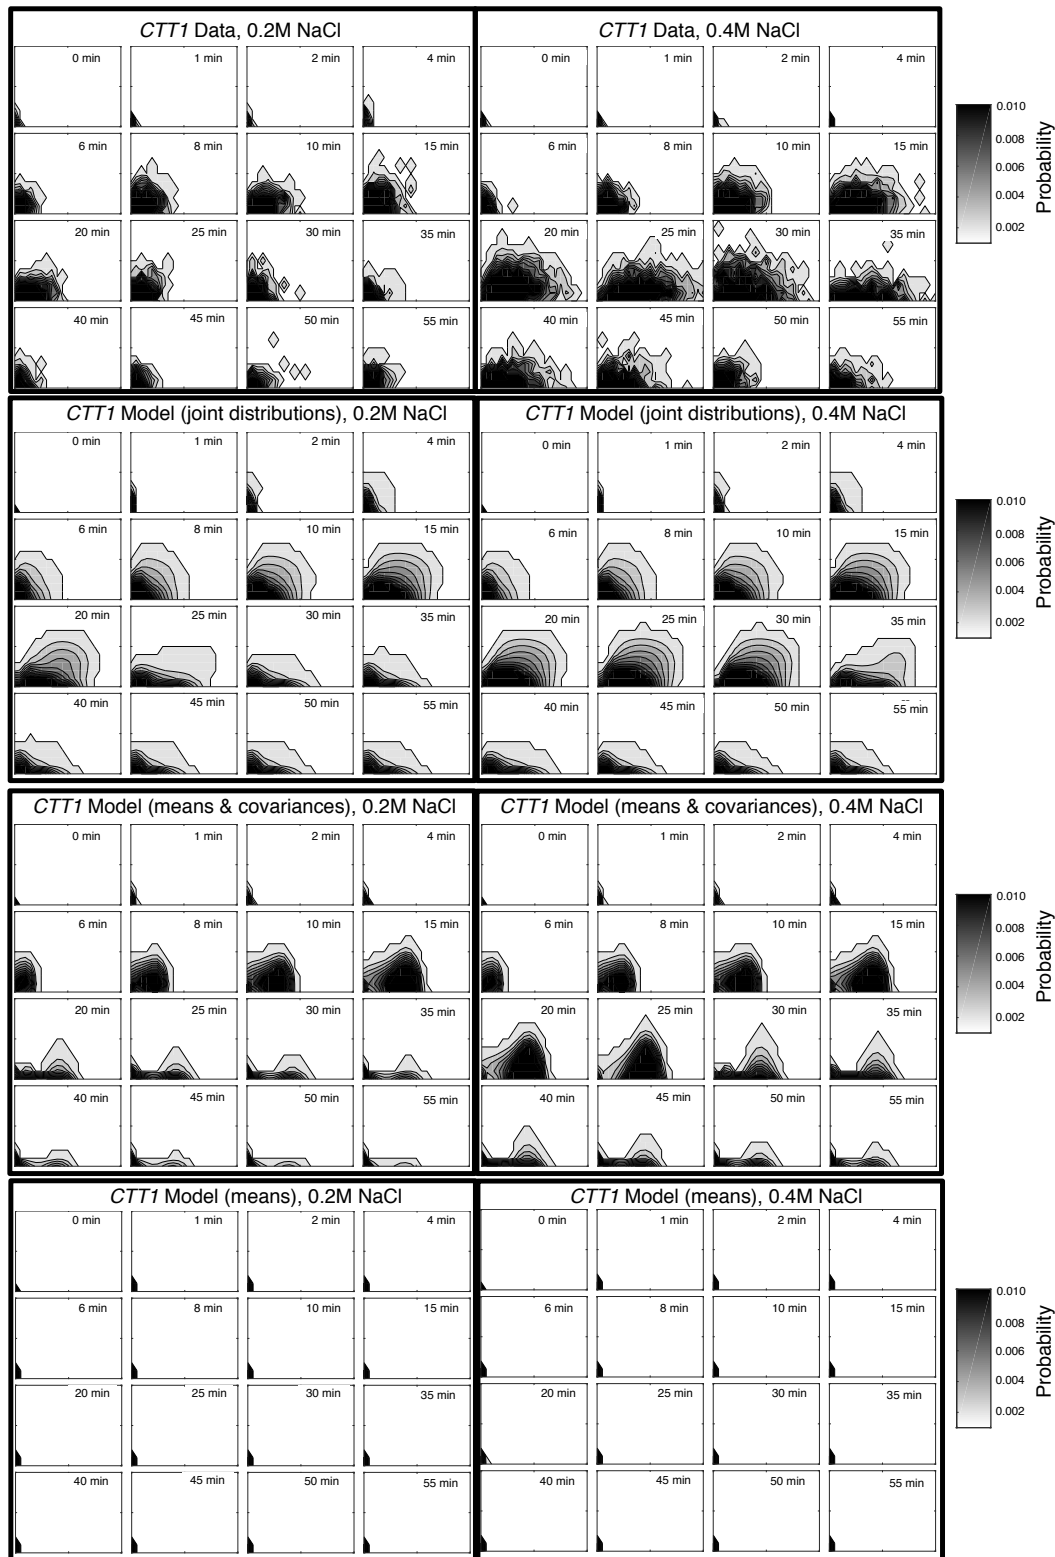

Figure S5: Experimental (row 1) and model-generated (rows 2-4) joint distributions for *CTT1* versus time for 0.2M NaCl (left) and 0.4M NaCl (right) osmotic shocks. Distributions have been generated using the model identified from the full joint distributions (row 2), the means and covariances (row 3) or the joint means (row 4). Limits of all x-axes are 0 to 200 copies of cytoplasmic mRNA. Limits of all y-axes are 0 to 10 copies of nuclear mRNA. All plots use the same contour levels (see legend to right). See Table S4 for the corresponding parameter sets.

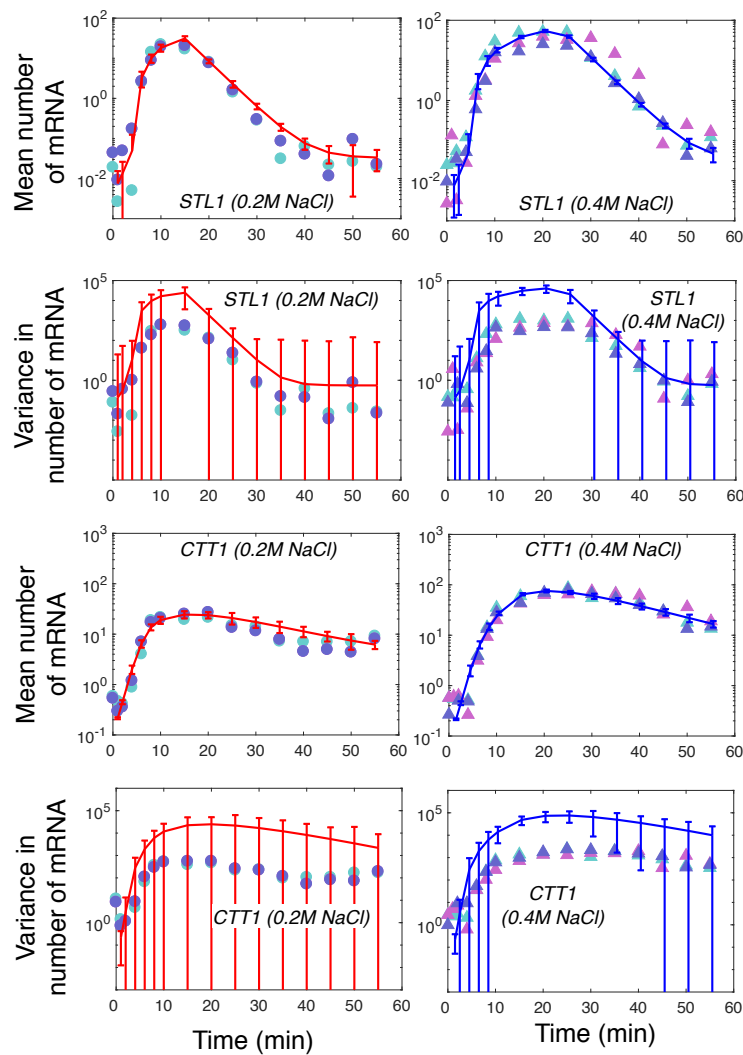

Figure S6: Best fit to the means and variances using the extended moments analysis for *STL1* and *CTT1* for 0.2M NaCl (left, 2 biological replica) and 0.4M NaCl (right, three biological replica) osmotic shock. Error bars denote the expected errors of one standard error above and below the estimated value for the corresponding statistic. According to the likelihood function defined in Section 2.5.3.4, the standard error of the sample mean is given by  $\sqrt{\sigma_{11}/N_S}$ , and the standard error of the sample variance is given by  $\sqrt{(\sigma_{1111} - \frac{N_S-3}{N_S-1}\sigma_{11}^2)/N_S}$ , where  $N_S$  is the sample size corresponding to the total measured number of cells for that time point and condition). Experimental data replicates are shown by the circles and triangles.

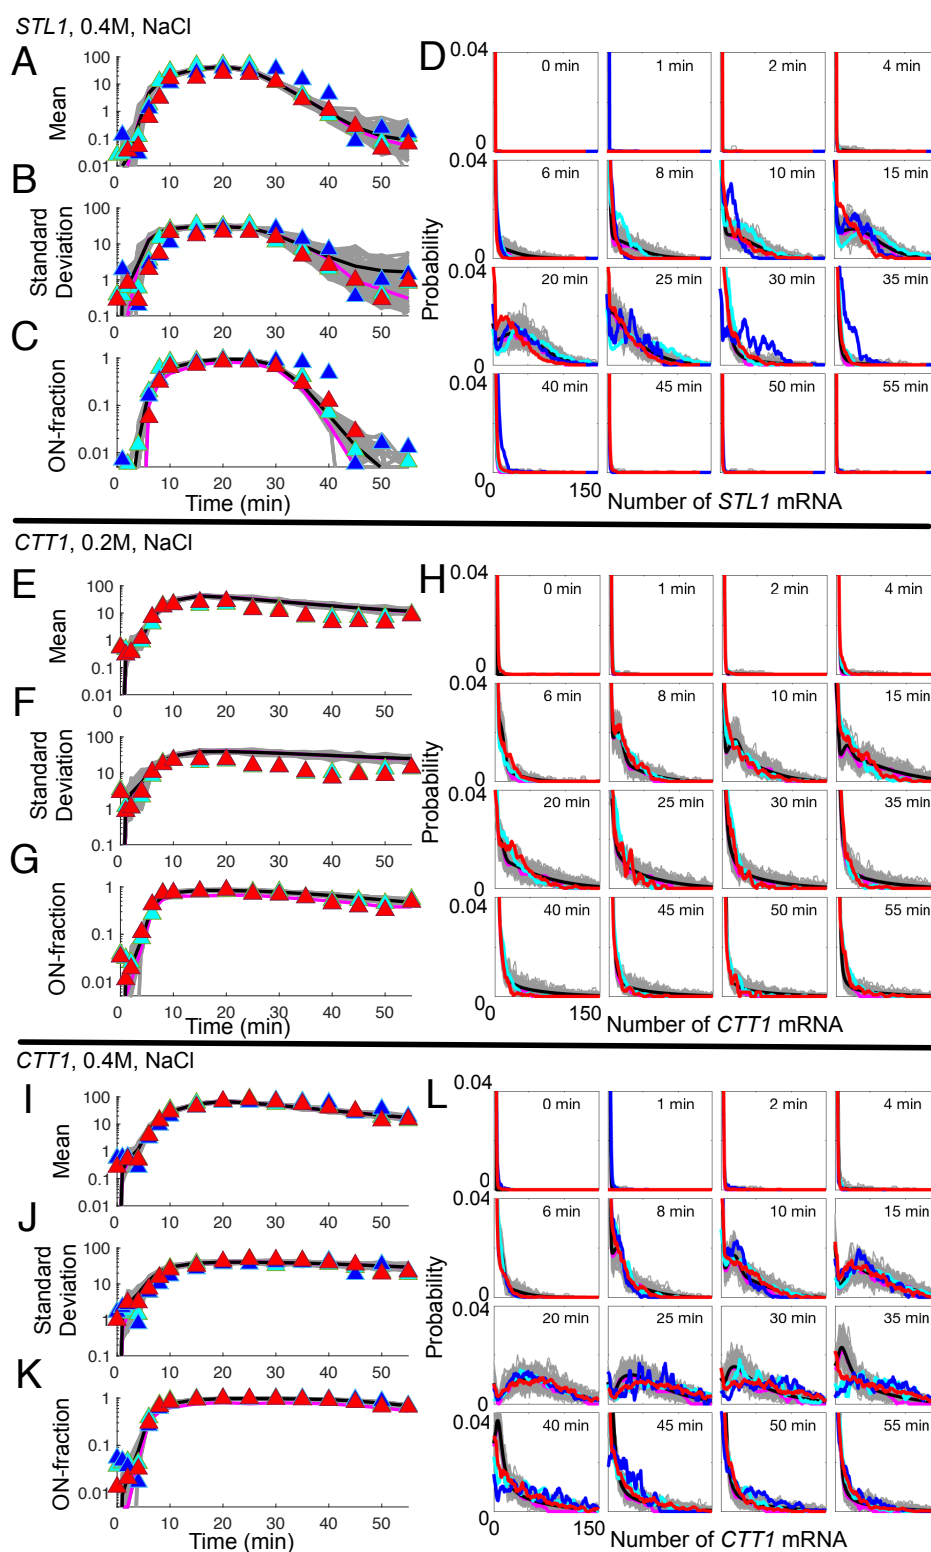

Figure S7: Means (A,E,I), standard deviations (B, F, J), ON-fractions (C, G, K) and probability distributions (D, H, L) for *STL1* at 0.4M NaCl osmotic shock (A-D), *CTT1* at 0.2M NaCl osmotic shock (E-H), and *CTT1* at 0.4M NaCl osmotic shock (I-L). In all panels, theoretical values from the fitted model are in black, representative simulated samples of 200 cells apiece are in gray, median statistics of the simulated samples are in magenta; and experimental data are in red and cyan (and blue for 0.4M NaCl). See also Figure 3 in the main text.

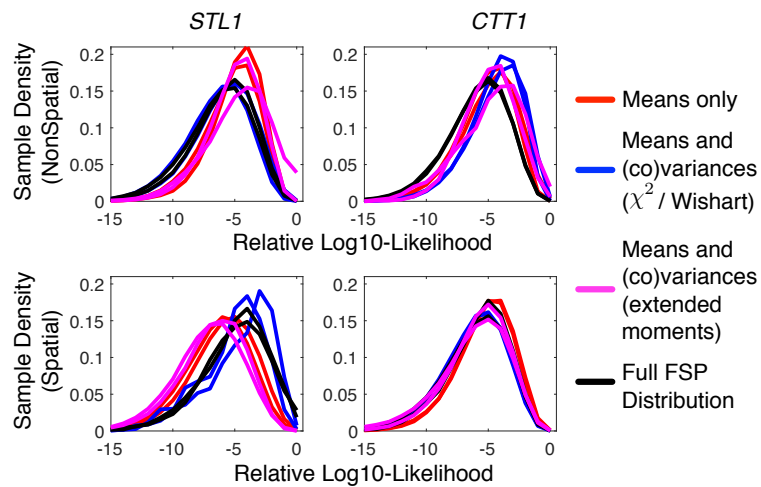

Figure S8: Distributions of  $\log_{10}$ -likelihoods that have been sampled by the Metropolis Hastings analysis for *STL1* (left) and *CTT1* (right) using non-spatial (top) or spatial (bottom) analyses. All likelihoods values are relative to the most likely model under the corresponding analysis. To illustrate convergence, multiple MH chains have been run for each analysis using means only (red,  $> 1.2 \times 10^6$  MH samples per chain), means and variances using the  $\chi^2$  or Wishart approach (blue,  $> 1.0 \times 10^6$  MH samples per chain), means and variances using the extended moments approach (magenta,  $> 3.0 \times 10^5$  MH samples per chain), or distributions (black,  $> 1.4 \times 10^5$  MH samples per chain for non-spatial analyses and  $> 2.0 \times 10^4$  MH samples per chain for spatial analyses).

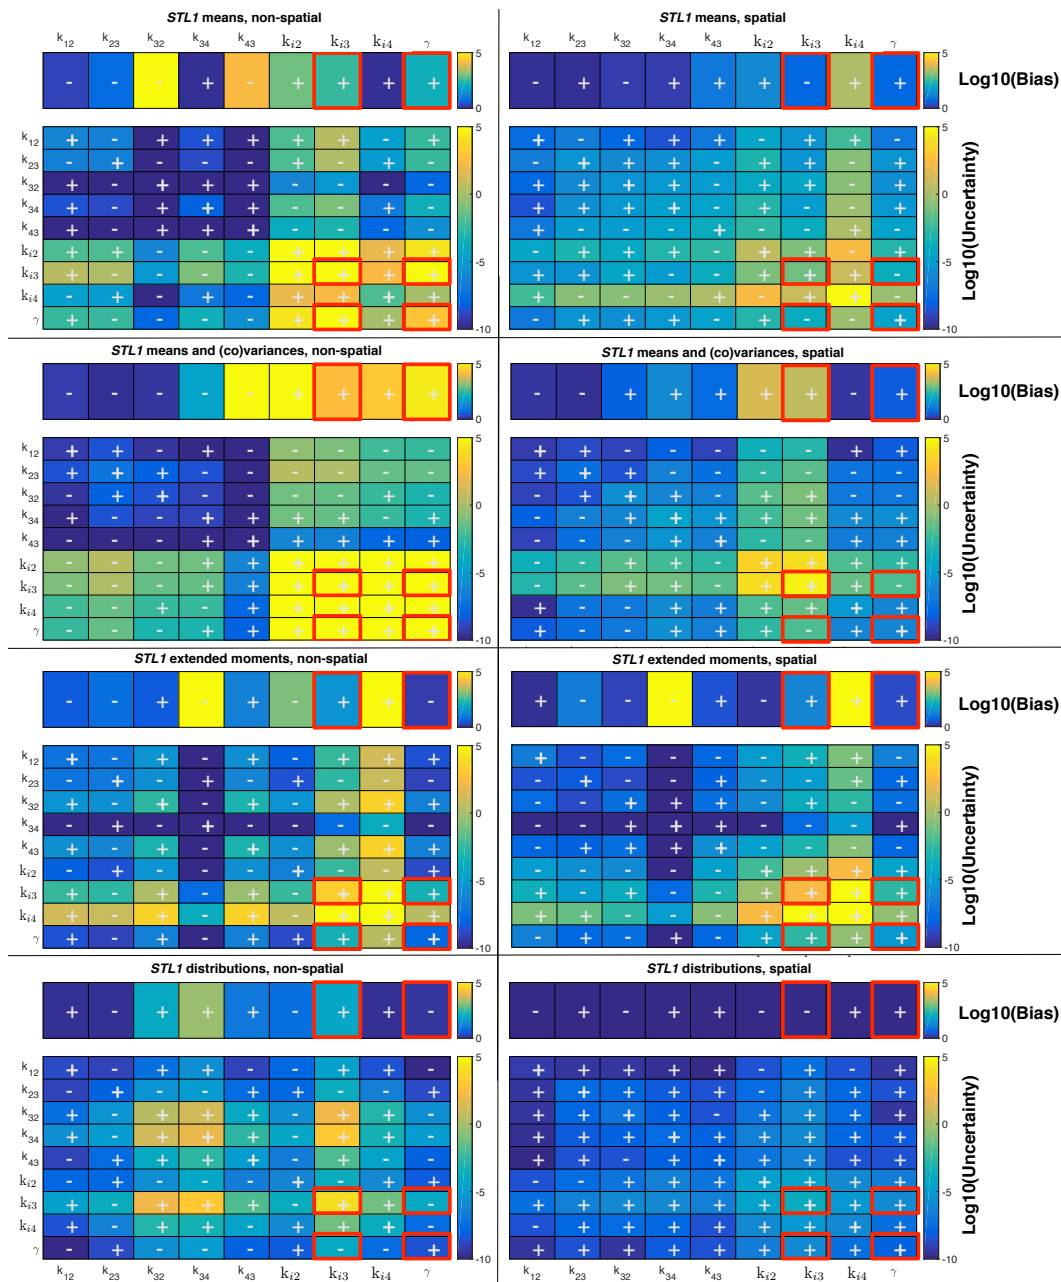

**Figure S9: Bias and Uncertainty in the estimation of parameters for the *STL1* mRNA transcription.**

MCMC results are summarized for the means (top row), means and variances using the  $\chi^2$  or Wishart approach (second row), means and variances using the extended moments analysis (third row), or full FSP distributions (bottom row) using non-spatial (left) or spatial (right) models. For each of the eight panels, the top row illustrates the parameter estimation biases, where the colors denote the fold-change magnitude of the estimation error (in logarithmic scale). Blue boxes represent well estimated parameters and yellow boxes represent poorly estimated parameters. The signs in each box denote whether the parameter is over estimated (+) or underestimated (-). The matrices at the bottom of each panel illustrate the joint uncertainties in all parameter combinations. These are shown in a logarithmic scale from low variance (blue) to high variance (yellow). The signs in each box denote whether the corresponding parameter combination is positively or negatively correlated. The same color scale is used in all panels to illustrate the relative effects of uncertainty and bias for the different analyses. The entries boxed in red correspond to the parameter ellipses for  $k_{i3}$  and  $\gamma$ , which are shown in Fig. 4A.

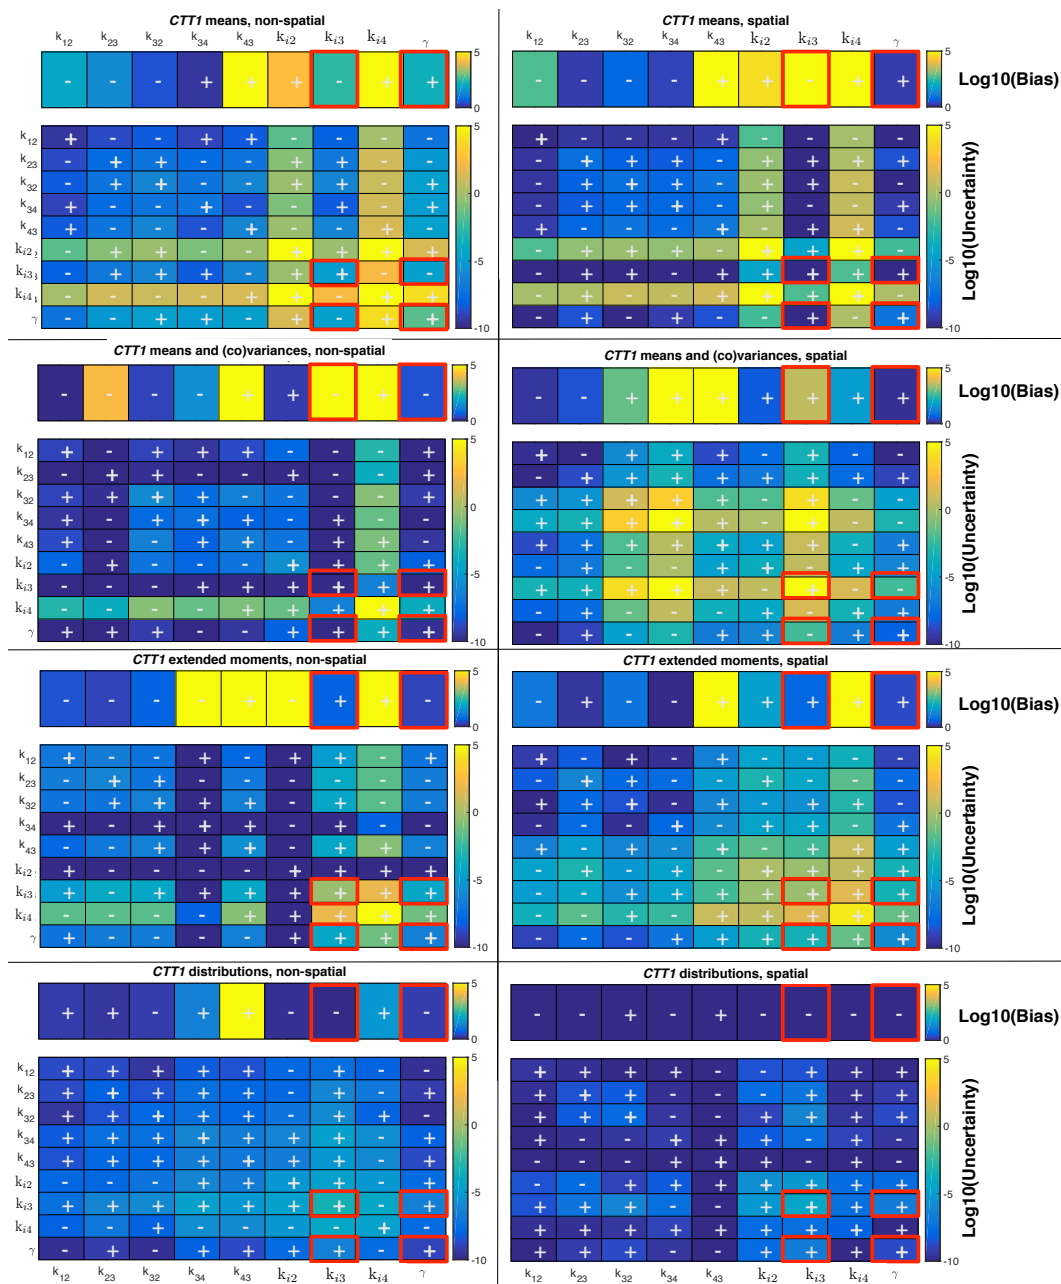

**Figure S10: Bias and Uncertainty in the estimation of parameters for the *CTT1* mRNA transcription.**

MCMC results are summarized for the means (top row), means and variances using the  $\chi^2$  or Wishart approach (second row), means and variances using the extended moments analysis (third row), or full FSP distributions (bottom row) using non-spatial (left) or spatial (right) models. For each panel, the top row illustrates the parameter estimation biases, where the colors denote the fold-change magnitude of the estimation error (in logarithmic scale). Blue boxes represent well estimated parameters and yellow boxes represent poorly estimated parameters. The signs in each box denote whether the parameter is over estimated (+) or underestimated (-). The matrices at the bottom of each panel illustrate the joint uncertainties in all parameter combinations. These are shown in logarithmic scale from low variance (blue) to high variance (yellow). The signs in each box denote whether the corresponding parameter combination is positively or negatively correlated. The same color scale is used in all six panels to illustrate the relative effects of uncertainty and bias for the six different analyses. The entries boxed in red correspond to the parameter ellipses for  $k_{i3}$  and  $\gamma$ , which are shown in Fig. S11A.



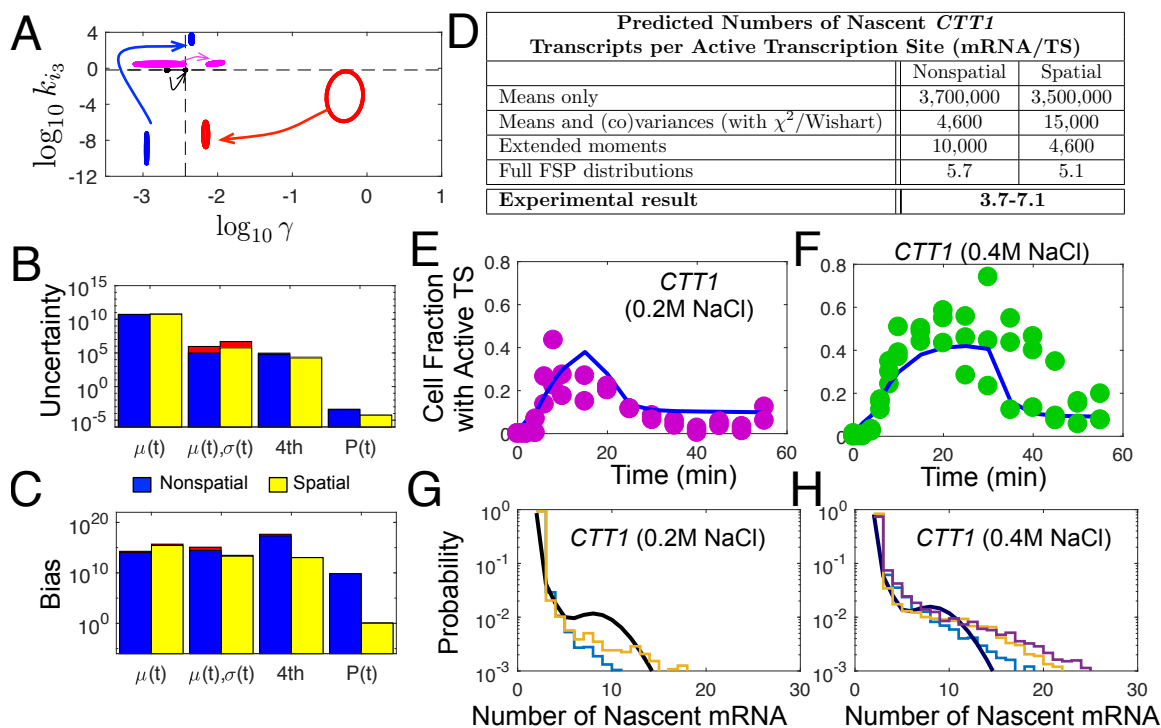

Figure S11: Overall bias and uncertainty quantification for *CTT1* transcription regulation. (A) Ninety percent confidence ellipses for the degradation rate ( $\gamma$ ) and the maximal transcription initiation rate ( $k_{i3}$ ) using the means only ( $\mu(t)$ , red), means and variances ( $\mu(t), \sigma(t)$ , blue), extended moment analyses (4th, magenta), or the full FSP distributions ( $P(t)$ , black). Arrows show the effect of adding spatial information to the analysis. The dashed black lines show the baseline parameter combination corresponding to the best fit parameters for the spatial *CTT1* model. (B) Total uncertainty in parameters for the four methods. (C) Total parameter bias for the four methods. For B and C, the results for non-spatial and spatial analyses are shown in blue and yellow, respectively, and the red regions show the convergence of two independent MHA samples. (D) Prediction for the average number of nascent mRNA per active *CTT1* transcription site using each of the identified models. (E,F) Prediction for the fraction of cells with active *CTT1* TS versus time at (E) 0.2M NaCl and (F) 0.4M NaCl osmotic shock. (G,H) Model fit (black) and biological replicas (blue, orange, purple) for the distributions of nascent *CTT1* mRNA per TS.

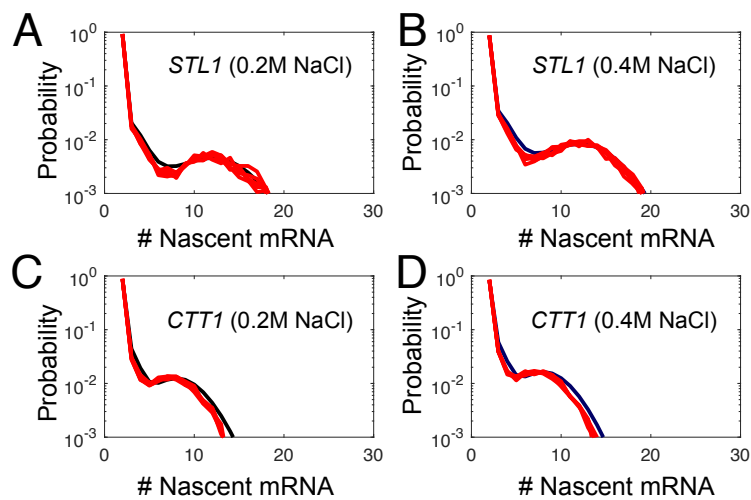

Figure S12: Comparison of FSP-based predictions (black) and several representative sets of 16,000 SSA simulations (red) for *STL1* TS intensity distributions following (A) 0.2M or (B) 0.4M NaCl osmotic shock and *CTT1* TS intensity distributions following (C) 0.2M or (D) 0.4M NaCl osmotic shock. The FSP and SSA analyses both use the best parameters found for the spatial FSP model (Table S3 for *STL1* and S4 for *CTT1*), with an elongation rate of 63nt/s.

| <b><i>CTTI</i> Probe Placement</b> |                                      | <b><i>STLI</i> Probe Placement</b> |                                      |
|------------------------------------|--------------------------------------|------------------------------------|--------------------------------------|
| Probe #                            | 3' base relative to mRNA termination | Probe #                            | 3' base relative to mRNA termination |
| 1                                  | 1618                                 | 1                                  | 1630                                 |
| 2                                  | 1578                                 | 2                                  | 1604                                 |
| 3                                  | 1542                                 | 3                                  | 1577                                 |
| 4                                  | 1507                                 | 4                                  | 1546                                 |
| 5                                  | 1461                                 | 5                                  | 1518                                 |
| 6                                  | 1428                                 | 6                                  | 1493                                 |
| 7                                  | 1403                                 | 7                                  | 1449                                 |
| 8                                  | 1378                                 | 8                                  | 1389                                 |
| 9                                  | 1349                                 | 9                                  | 1364                                 |
| 10                                 | 1320                                 | 10                                 | 1325                                 |
| 11                                 | 1275                                 | 11                                 | 1282                                 |
| 12                                 | 1245                                 | 12                                 | 1250                                 |
| 13                                 | 1199                                 | 13                                 | 1200                                 |
| 14                                 | 1171                                 | 14                                 | 1172                                 |
| 15                                 | 1131                                 | 15                                 | 1144                                 |
| 16                                 | 1091                                 | 16                                 | 1104                                 |
| 17                                 | 1066                                 | 17                                 | 1078                                 |
| 18                                 | 1044                                 | 18                                 | 1035                                 |
| 19                                 | 1014                                 | 19                                 | 1001                                 |
| 20                                 | 987                                  | 20                                 | 971                                  |
| 21                                 | 953                                  | 21                                 | 913                                  |
| 22                                 | 913                                  | 22                                 | 884                                  |
| 23                                 | 884                                  | 23                                 | 856                                  |
| 24                                 | 854                                  | 24                                 | 830                                  |
| 25                                 | 832                                  | 25                                 | 805                                  |
| 26                                 | 810                                  | 26                                 | 768                                  |
| 27                                 | 788                                  | 27                                 | 743                                  |
| 28                                 | 743                                  | 28                                 | 702                                  |
| 29                                 | 693                                  | 29                                 | 670                                  |
| 30                                 | 671                                  | 30                                 | 635                                  |
| 31                                 | 648                                  | 31                                 | 610                                  |
| 32                                 | 615                                  | 32                                 | 574                                  |
| 33                                 | 591                                  | 33                                 | 545                                  |
| 34                                 | 568                                  | 34                                 | 509                                  |
| 35                                 | 546                                  | 35                                 | 472                                  |
| 36                                 | 519                                  | 36                                 | 435                                  |
| 37                                 | 491                                  | 37                                 | 396                                  |
| 38                                 | 468                                  | 38                                 | 356                                  |
| 39                                 | 445                                  | 39                                 | 324                                  |
| 40                                 | 390                                  | 40                                 | 287                                  |
| 41                                 | 313                                  | 41                                 | 250                                  |
| 42                                 | 289                                  | 42                                 | 223                                  |
| 43                                 | 237                                  | 43                                 | 184                                  |
| 44                                 | 166                                  | 44                                 | 138                                  |
| 45                                 | 105                                  | 45                                 | 113                                  |
| 46                                 | 57                                   | 46                                 | 86                                   |
| 47                                 | 27                                   | 47                                 | 59                                   |
| 48                                 | 0                                    | 48                                 | 24                                   |

Table S1: Locations for smRNA-FISH probes.

| Osmotic Shock Condition | Parameter Values      |                       |             |                   |                      |
|-------------------------|-----------------------|-----------------------|-------------|-------------------|----------------------|
|                         | $r_1$<br>( $s^{-1}$ ) | $r_2$<br>( $s^{-1}$ ) | $\eta$<br>- | $A$<br>-          | $M$<br>-             |
| 0.2M NaCl               | $6.1 \times 10^{-3}$  | $6.9 \times 10^{-3}$  | 5.9         | $9.3 \times 10^9$ | $2.2 \times 10^{-2}$ |
| 0.4M NaCl               | $6.1 \times 10^{-3}$  | $3.8 \times 10^{-3}$  | 5.9         | $9.3 \times 10^9$ | $2.2 \times 10^{-2}$ |

Table S2: Parameterization of the Hog1p nuclear enrichment signal at 0.2M and 0.4M NaCl osmotic shock.

| STLI Model Parameter Values – State Transition Rates |         |                   |                   |                   |                   |                   |                   |                   |
|------------------------------------------------------|---------|-------------------|-------------------|-------------------|-------------------|-------------------|-------------------|-------------------|
| Statistics                                           | Spatial | * $k_{12}$        | * $k_{21}^{(0)}$  | * $k_{21}^{(1)}$  | * $k_{23}$        | * $k_{32}$        | * $k_{34}$        | * $k_{43}$        |
| [5]                                                  | No      | 1.3E+00           | 3.2E+03           | 7.7E+03           | 6.7E-03           | 2.7E-02           | 1.3E-01           | 3.8E-02           |
| $\mu$                                                | No      | 1.2E-03 ± 7.9E-04 | 1.6E+01 ± 8.2E+00 | 5.4E+05 ± 2.7E+05 | 1.2E-03 ± 7.9E-04 | 1.1E-08 ± 2.9E-06 | 5.2E-03 ± 9.5E-05 | 2.6E-07 ± 2.8E-06 |
| $\mu, \Sigma (\chi^2)$                               | No      | 1.4E-03 ± 2.7E-05 | 3.0E+01 ± 7.4E-01 | 9.7E+05 ± 2.3E+04 | 5.6E-03 ± 2.8E-04 | 7.5E-03 ± 6.2E-05 | 5.7E-05 ± 2.4E-05 | 8.7E-09 ± 3.5E-06 |
| Extended Moments                                     | No      | 5.6E-04 ± 2.5E-04 | 6.0E+02 ± 1.8E+02 | 7.3E+05 ± 1.7E+05 | 9.6E-04 ± 4.7E-04 | 4.2E-02 ± 3.3E-02 | 1.0E-08 ± 2.8E-06 | 4.4E-02 ± 2.5E-02 |
| FSP                                                  | No      | 3.4E-03 ± 4.6E-05 | 5.1E+00 ± 9.3E-01 | 1.1E+03 ± 2.2E+02 | 6.4E-03 ± 9.6E-05 | 1.5E+00 ± 1.7E+00 | 8.3E+00 ± 9.2E+00 | 3.7E-02 ± 2.9E-03 |
| $\mu$                                                | Yes     | 2.0E-03 ± 1.7E-04 | 2.6E+03 ± 4.1E+02 | 8.1E+05 ± 1.2E+05 | 1.1E-02 ± 2.1E-03 | 7.6E-03 ± 2.1E-03 | 8.6E-03 ± 5.2E-03 | 2.7E-02 ± 9.6E-03 |
| $\mu, \Sigma$ (Wishart)                              | Yes     | 1.6E-03 ± 2.5E-05 | 3.9E+00 ± 1.0E-01 | 7.4E+04 ± 1.7E+03 | 5.7E-03 ± 2.2E-04 | 6.2E-02 ± 1.4E-03 | 1.0E-01 ± 4.7E-03 | 1.9E-02 ± 6.6E-04 |
| Extended Moments                                     | Yes     | 3.4E-03 ± 5.1E-04 | 8.2E+02 ± 1.2E+02 | 8.6E+05 ± 1.0E+05 | 5.2E-04 ± 7.8E-05 | 5.7E-03 ± 2.3E-04 | 3.5E-08 ± 9.9E-06 | 9.7E-03 ± 1.4E-03 |
| FSP                                                  | Yes     | 2.6E-03 ± 2.6E-05 | 1.9E+01 ± 3.0E+00 | 3.2E+04 ± 5.1E+03 | 7.6E-03 ± 1.6E-04 | 1.2E-02 ± 2.8E-04 | 4.0E-03 ± 1.6E-04 | 3.1E-03 ± 8.9E-05 |

| STLI Model Parameter Values – Transcription and Degradation Rates |         |                   |                   |                   |                   |                   |                   |
|-------------------------------------------------------------------|---------|-------------------|-------------------|-------------------|-------------------|-------------------|-------------------|
| Statistics                                                        | Spatial | * $k_{i1}$        | * $k_{i2}$        | * $k_{i3}$        | * $k_{i4}$        | # $\gamma$        | $t_0$             |
| [5]                                                               | No      | 7.8E-04           | 1.2E-02           | 9.9E-01           | 5.4E-02           | 4.9E-03           | 1.9E+02           |
| $\mu$                                                             | No      | 1.6E-02 ± 1.1E-02 | 1.5E+02 ± 1.2E+02 | 3.3E+02 ± 2.5E+02 | 3.7E-02 ± 3.6E-02 | 1.3E+00 ± 1.1E+00 | 3.4E+02 ± 1.7E+00 |
| $\mu, \Sigma (\chi^2)$                                            | No      | 2.6E+01 ± 1.5E+01 | 3.8E+04 ± 2.3E+04 | 1.6E+04 ± 1.0E+04 | 7.1E+02 ± 4.4E+02 | 5.2E+02 ± 3.2E+02 | 3.6E+02 ± 8.8E-01 |
| Extended Moments                                                  | No      | 1.1E-04 ± 2.4E-05 | 3.9E-04 ± 8.8E-04 | 3.3E+01 ± 2.2E+01 | 2.1E+04 ± 2.4E+04 | 4.3E-03 ± 1.1E-04 | 1.0E+02 ± 4.7E+00 |
| FSP                                                               | No      | 9.0E-05 ± 1.2E-05 | 2.0E-02 ± 7.7E-04 | 1.1E+02 ± 1.2E+02 | 4.1E-02 ± 1.4E-02 | 5.3E-03 ± 5.9E-05 | 2.0E+02 ± 2.3E+00 |
| $\mu$                                                             | Yes     | 2.0E-03 ± 1.1E-03 | 3.8E+00 ± 2.0E+00 | 1.5E-01 ± 3.1E-01 | 2.6E+01 ± 3.1E+01 | 4.5E-02 ± 6.2E-03 | 1.0E+00 ± 1.3E-01 |
| $\mu, \Sigma$ (Wishart)                                           | Yes     | 6.1E-01 ± 5.0E-02 | 1.1E+03 ± 5.2E+01 | 3.4E+03 ± 1.9E+02 | 1.9E-02 ± 2.6E-03 | 3.2E-02 ± 7.9E-04 | 8.9E-01 ± 2.1E-02 |
| Extended Moments                                                  | Yes     | 1.2E-03 ± 4.3E-04 | 1.0E-01 ± 6.4E-02 | 1.8E+01 ± 5.9E+00 | 3.6E+03 ± 2.7E+03 | 2.4E-02 ± 2.5E-03 | 5.9E-01 ± 6.1E-02 |
| FSP                                                               | Yes     | 5.9E-04 ± 2.6E-05 | 1.7E-01 ± 4.4E-03 | 1.0E+00 ± 1.4E-02 | 3.0E-02 ± 1.1E-03 | 8.3E-03 ± 1.0E-04 | 2.6E-01 ± 4.0E-03 |

| STLI Model Parameter Values – Spatial Rates |         |                   |                   |                   |
|---------------------------------------------|---------|-------------------|-------------------|-------------------|
| Statistics                                  | Spatial | # $\gamma_{nuc}$  | # $\gamma_{cyt}$  | # $k_{transport}$ |
| $\mu$                                       | Yes     | 7.5E-01 ± 9.6E-01 | 4.5E-02 ± 6.2E-03 | 1.0E+00 ± 1.3E-01 |
| $\mu, \Sigma (\chi^2)$                      | Yes     | 5.2E+02 ± 2.5E+01 | 3.2E-02 ± 7.9E-04 | 8.9E-01 ± 2.1E-02 |
| Extended Moments                            | Yes     | 2.1E-01 ± 2.6E-01 | 2.4E-02 ± 2.5E-03 | 5.9E-01 ± 6.1E-02 |
| FSP                                         | Yes     | 2.2E-06 ± 2.0E-05 | 8.3E-03 ± 1.0E-04 | 2.6E-01 ± 4.0E-03 |

Table S3: Parameter values (and uncertainty) for the final model for *STLI*. Each parameter set was identified using a different fluctuation analysis: means ( $\mu$ ), means and (co)variances ( $\mu$  and  $\sigma/\Sigma$  with  $\chi^2$  or Wishart formulation), the extended moments-based analysis using the means and covariances and a likelihood function defined by the first four moments, or distributions; and a different assumption on the spatial fluctuations: non-spatial or spatial). Parameter uncertainties were identified using the Metropolis Hastings algorithm on the corresponding likelihood function and are listed as plus or minus one standard deviation. Units of all parameters denoted by (\*) are  $s^{-1}$ . Units of all parameters denoted by (#) are  $Molecules^{-1}s^{-1}$ . Units of  $k_{21}^{(1)}$  are  $AUC^{-1}s^{-1}$ , where  $AUC$  is arbitrary units of Hog1p concentration. Units of  $t_0$  are  $s$ .

| CTTI Model Parameter Values – State Transition Rates |         |                   |                   |                   |                   |                   |                   |                   |
|------------------------------------------------------|---------|-------------------|-------------------|-------------------|-------------------|-------------------|-------------------|-------------------|
| Statistics                                           | Spatial | * $k_{12}$        | * $k_{21}^{(0)}$  | $k_{21}^{(1)}$    | * $k_{23}$        | * $k_{32}$        | * $k_{34}$        | * $k_{43}$        |
| [5]                                                  | No      | 1.3E+00           | 3.2E+03           | 7.7E+03           | 1.9E-02           | 1.8E-02           | 1.3E-01           | 8.3E-03           |
| $\mu$                                                | No      | 2.5E-05 ± 2.3E-05 | 2.0E+03 ± 1.2E+03 | 3.8E+04 ± 2.1E+04 | 2.6E-04 ± 2.3E-04 | 3.0E-03 ± 8.7E-04 | 8.2E-04 ± 3.3E-04 | 1.8E-03 ± 6.2E-04 |
| $\mu, \Sigma (\chi^2)$                               | No      | 1.9E-03 ± 2.9E-05 | 7.1E-02 ± 9.5E-04 | 5.9E+00 ± 4.8E-01 | 5.3E-07 ± 6.8E-06 | 3.4E-03 ± 1.2E-03 | 3.1E-06 ± 7.7E-06 | 2.5E-03 ± 5.6E-04 |
| Extended Moments                                     | No      | 7.2E-04 ± 5.2E-04 | 7.6E+02 ± 2.0E+02 | 2.9E+03 ± 6.6E+02 | 1.4E-03 ± 8.2E-04 | 1.4E-03 ± 5.2E-04 | 6.1E-08 ± 5.9E-06 | 6.1E-03 ± 1.5E-03 |
| FSP                                                  | No      | 3.8E-03 ± 4.9E-05 | 2.3E-01 ± 9.6E-03 | 3.5E+00 ± 3.7E-01 | 5.0E-03 ± 1.1E-04 | 4.0E-03 ± 1.2E-04 | 9.4E-03 ± 8.4E-04 | 4.4E-03 ± 3.1E-04 |
| $\mu$                                                | Yes     | 7.2E-06 ± 1.0E-05 | 1.6E+03 ± 7.2E+02 | 3.8E+03 ± 1.7E+03 | 1.5E-03 ± 2.1E-04 | 1.3E-03 ± 1.6E-04 | 2.1E-04 ± 9.3E-05 | 2.5E-03 ± 2.6E-04 |
| $\mu, \Sigma$ (Wishart)                              | Yes     | 1.5E-03 ± 1.6E-05 | 1.5E-01 ± 3.3E-03 | 1.2E+02 ± 4.3E+00 | 9.2E-04 ± 4.2E-05 | 3.8E+00 ± 1.7E+00 | 4.2E+02 ± 1.8E+02 | 1.0E-01 ± 8.5E-03 |
| Extended Moments                                     | Yes     | 1.7E-04 ± 2.4E-05 | 2.7E+00 ± 1.0E+00 | 3.3E+03 ± 1.3E+03 | 4.5E-03 ± 9.7E-04 | 7.5E-04 ± 5.7E-05 | 5.3E-04 ± 1.4E-04 | 2.2E-01 ± 6.5E-02 |
| FSP                                                  | Yes     | 2.1E-03 ± 2.2E-05 | 9.2E-03 ± 2.1E-04 | 2.7E+03 ± 4.1E+02 | 3.1E-03 ± 5.2E-05 | 7.4E-03 ± 1.7E-04 | 5.6E-04 ± 2.6E-05 | 1.0E-07 ± 1.5E-05 |

| CTTI Model Parameter Values – Transcription and Degradation Rates |         |                   |                   |                   |                   |                   |                   |
|-------------------------------------------------------------------|---------|-------------------|-------------------|-------------------|-------------------|-------------------|-------------------|
| Statistics                                                        | Spatial | * $k_{i1}$        | * $k_{i2}$        | * $k_{i3}$        | * $k_{i4}$        | # $\gamma$        | $t_0$             |
| [5]                                                               | No      | 6.2E-04           | 9.8E-03           | 1.0E+00           | 1.6E-03           | 2.0E-03           | 1.9E+02           |
| $\mu$                                                             | No      | 2.6E-01 ± 6.4E-02 | 2.2E+03 ± 1.3E+03 | 4.7E-03 ± 3.6E-03 | 4.2E+05 ± 2.3E+05 | 5.5E-01 ± 1.4E-01 | 2.6E+02 ± 4.0E+00 |
| $\mu, \Sigma (\chi^2)$                                            | No      | 6.3E-05 ± 1.0E-04 | 2.1E-01 ± 1.8E-03 | 2.4E-08 ± 6.8E-06 | 5.2E+02 ± 3.1E+02 | 1.1E-03 ± 1.3E-05 | 2.2E+02 ± 1.6E+00 |
| Extended Moments                                                  | No      | 3.3E-03 ± 7.9E-04 | 6.2E-08 ± 5.9E-06 | 3.1E+00 ± 6.8E-01 | 1.2E+03 ± 3.1E+02 | 1.9E-03 ± 6.4E-04 | 4.9E+01 ± 1.3E+01 |
| FSP                                                               | No      | 1.1E-03 ± 3.9E-05 | 9.9E-02 ± 2.7E-03 | 6.1E-01 ± 1.9E-02 | 2.4E-02 ± 3.8E-03 | 2.1E-03 ± 3.8E-05 | 2.1E+02 ± 2.1E+00 |
| $\mu$                                                             | Yes     | 1.1E-01 ± 3.5E-02 | 4.4E+03 ± 2.8E+03 | 1.5E-07 ± 4.1E-07 | 4.0E+05 ± 2.3E+05 | 6.9E-03 ± 2.6E-04 | 3.0E-01 ± 1.0E-02 |
| $\mu, \Sigma$ (Wishart)                                           | Yes     | 3.1E-03 ± 2.1E-04 | 4.6E-01 ± 1.1E-02 | 1.7E+03 ± 7.3E+02 | 1.6E-02 ± 1.4E-02 | 4.5E-03 ± 9.0E-05 | 2.6E-01 ± 3.9E-03 |
| Extended Moments                                                  | Yes     | 5.6E-03 ± 5.8E-04 | 6.7E+00 ± 1.4E+00 | 3.5E+00 ± 6.4E-01 | 5.2E+02 ± 1.3E+02 | 9.4E-03 ± 1.0E-03 | 3.8E-01 ± 3.5E-02 |
| FSP                                                               | Yes     | 2.5E-03 ± 5.0E-05 | 1.2E-01 ± 1.8E-03 | 6.5E-01 ± 8.6E-03 | 5.5E-04 ± 9.2E-05 | 3.7E-03 ± 4.2E-05 | 1.8E-01 ± 2.4E-03 |

| CTTI Model Parameter Values – Spatial Rates |         |                   |                   |                   |
|---------------------------------------------|---------|-------------------|-------------------|-------------------|
| Statistics                                  | Spatial | # $\gamma_{nuc}$  | # $\gamma_{cyt}$  | # $k_{transport}$ |
| $\mu$                                       | Yes     | 4.9E+00 ± 1.7E+00 | 6.9E-03 ± 2.6E-04 | 3.0E-01 ± 1.0E-02 |
| $\mu, \Sigma (\chi^2)$                      | Yes     | 4.2E-03 ± 4.5E-03 | 4.5E-03 ± 9.0E-05 | 2.6E-01 ± 3.9E-03 |
| Extended Moments                            | Yes     | 6.8E-07 ± 2.2E-06 | 9.4E-03 ± 1.0E-03 | 3.8E-01 ± 3.5E-02 |
| FSP                                         | Yes     | 1.0E-07 ± 1.5E-05 | 3.7E-03 ± 4.2E-05 | 1.8E-01 ± 2.4E-03 |

Table S4: Parameter values (and uncertainty) for the final model for CTTI. Each parameter set was identified using a different fluctuation analysis: means ( $\mu$ ), means and (co)variances ( $\mu$  and  $\sigma / \Sigma$  with  $\chi^2$  or Wishart formulation), the extended moments-based analysis using the means and covariances and a likelihood function defined by the first four moments, or distributions computed with the FSP approach; and a different assumption on the spatial fluctuations: non-spatial or spatial). Parameter uncertainties were identified using the Metropolis Hastings algorithm on the corresponding likelihood function and are listed as plus or minus one standard deviation. Units of all parameters denoted by (\*) are  $s^{-1}$ . Units of all parameters denoted by (#) are  $Molecules^{-1}s^{-1}$ . Units of  $k_{21}^{(1)}$  are  $AUC^{-1}s^{-1}$ , where  $AUC$  is arbitrary units of Hog1p concentration. Units of  $t_0$  are  $s$ .

| <b>STLI Relative -Log<sub>10</sub>-Likelihood Values</b> |         |                            |                      |                   |               |
|----------------------------------------------------------|---------|----------------------------|----------------------|-------------------|---------------|
|                                                          |         | <b>Likelihood Function</b> |                      |                   |               |
| Fitting Data                                             | Spatial | $\mu^*$                    | $\mu$ and $\Sigma^*$ | Extended Moments* | Distributions |
| Means only                                               | No      | 0                          | -1.72E+04            | -1.64E+04         | -6.97E+04     |
| Means and variances ( $chi^2$ )                          | No      | -4.46E+02                  | 0                    | -1.85E+04         | -6.26E+04     |
| Extended moments                                         | No      | -6.83E+02                  | -3.71E+04            | 0                 | -4.94E+04     |
| Full FSP Distributions                                   | No      | -2.75E+03                  | -1.45E+04            | -6.64E+02         | 0             |
| Means only                                               | Yes     | 0                          | -6.46E+04            | -7.32E+03         | -2.72E+04     |
| Means and variances (Wishart)                            | Yes     | -7.62E+02                  | 0                    | -7.20E+03         | -1.77E+04     |
| Extended moments                                         | Yes     | -1.88E+03                  | -4.75E+04            | 0                 | -8.15E+04     |
| Full FSP Distributions                                   | Yes     | -1.03E+04                  | -2.40E+04            | -3.45E+03         | 0             |
| <b>CTTI Relative -Log<sub>10</sub>-Likelihood Values</b> |         |                            |                      |                   |               |
|                                                          |         | <b>Likelihood Function</b> |                      |                   |               |
| Fitting Statistics                                       | Spatial | $\mu^*$                    | $\mu$ and $\Sigma^*$ | Extended Moments* | Distributions |
| Means only                                               | No      | 0                          | -1.83E+05            | -1.48E+03         | -3.62E+05     |
| Means and variances ( $chi^2$ )                          | No      | -1.61E+03                  | 0                    | -2.29E+03         | -3.06E+04     |
| Extended moments                                         | No      | -9.49E+02                  | -5.24E+04            | 0                 | -9.39E+04     |
| Full FSP Distributions                                   | No      | -4.76E+03                  | -5.62E+03            | -1.83E+03         | 0             |
| Means only                                               | Yes     | 0                          | -3.85E+05            | -1.94E+03         | -3.57E+05     |
| Means and variances (Wishart)                            | Yes     | -3.11E+03                  | 0                    | -1.94E+04         | -2.45E+04     |
| Extended moments                                         | Yes     | -4.13E+03                  | -1.25E+05            | 0                 | -2.36E+05     |
| Full FSP Distributions                                   | Yes     | -1.56E+04                  | -1.60E+04            | -6.65E+03         | 0             |

Table S5: Relative log-likelihood values for different likelihoods that compare the means ( $\mu$ ), means and (co)variances ( $\mu$  and  $\sigma/\Sigma$  with  $\chi^2$  or Wishart formulation), the extended moments-based approach, or full distributions. Each row corresponds to a different combination of gene and identification strategy. Each column corresponds to a different likelihood function. Values presented are  $\log_{10}$  of the actual likelihoods relative to the best value found for that objective function. For example, a value of zero states that the corresponding parameter set (Tables S4,S3) maximizes that likelihood function. A value  $-x_{ij}$ , in the  $i$ -row and  $j$ -column states that the parameters identified using the  $i^{\text{th}}$  likelihood yields  $10^{x_{ij}}$ -fold worse fit to the  $j^{\text{th}}$  likelihood function. See Section 2.8 for detailed instructions on how to interpret this table. \*The moment-based likelihood functions are approximated using the Central Limit Theorem as discussed in the Materials and Methods.

| <b>Estimation of <i>CTTI</i> Transcription Elongation Rates (Nt/s)</b> |                |                          |                     |
|------------------------------------------------------------------------|----------------|--------------------------|---------------------|
| <b>Analysis</b>                                                        | <b>Spatial</b> | <b>Simplified Theory</b> | <b>Detailed FSP</b> |
| Means only                                                             | No             | 5.93E+07 ± 5.9E+06       | N/A                 |
| Means and variances ( $\chi^2$ )                                       | No             | 7.25E+04 ± 7.3E+03       | N/A                 |
| Extended moments                                                       | No             | 1.65E+05 ± 1.7E+04       | N/A                 |
| Full FSP Distributions                                                 | No             | 85.8 ± 8.6               | 45 ± 14             |
| Means only                                                             | Yes            | 5.54E+07 ± 5.6E+06       | N/A                 |
| Means and (co)variances (Wishart)                                      | Yes            | 2.39E+05 ± 2.4E+04       | N/A                 |
| Extended moments                                                       | Yes            | 7.27E+04 ± 7.3E+03       | N/A                 |
| Full FSP Distributions                                                 | Yes            | 91.2 ± 9.1               | <b>*63 ± 13</b>     |

Table S6: Elongation rates identified for *CTTI* transcription using the best parameters identified in Tables S4 and the measured TS intensity data. For each case – means ( $\mu$ ), means and (co)variances ( $\mu$  and  $\Sigma$ ), extended moments, or distributions – we present the upper bound on the rates using the simplified theoretical model and the more precise rates using the detailed FSP-TS analysis, when possible. Uncertainty in these rates is given as the standard error of the mean computed from the five biological replicates. (\*Figs. 1D, 4D, and S11 use the rate identified from *CTTI* TS intensity measurements and the corresponding fit of the elongation rate with the spatial FSP analysis.)
